# Supplementary material for: Effect of peptide secondary structure on calcium phosphate mineralization for bone regeneration
Source: Royal Society of Chemistry journal article supplement (doi:10.1039/d4nj04145c), 2025-01-01
Supplement: d4nj04145c1.xlsx [file d4nj04145c1.xlsx]

## Sheet: Fig. 1
b					c					e					f					g
260	-0.83337	-0.24572	-0.02112		260	0.05332	-0.02112	-0.08514		260	-0.32412	-0.25322	-0.20767		260	-0.51292	-0.40283	-0.497		260	-0.36769	-0.13835	-0.34817
259	-0.95816	-0.3606	0.0287		259	0.19128	0.0287	-0.18814		259	-0.33413	-0.26518	-0.23788		259	-0.48282	-0.45364	-0.49185		259	-0.35282	-0.09442	-0.34899
258	-0.84771	-0.37928	-0.0231		258	0.12882	-0.0231	-0.16707		258	-0.33292	-0.27049	-0.2617		258	-0.45539	-0.48817	-0.48277		258	-0.34021	-0.06173	-0.34482
257	-0.81725	-0.30987	-0.00627		257	0.10025	-0.00627	-0.15266		257	-0.32047	-0.26914	-0.27914		257	-0.43062	-0.50644	-0.46976		257	-0.32987	-0.04029	-0.33568
256	-0.89431	-0.28449	-0.0067		256	0.04865	-0.0067	-0.16419		256	-0.2968	-0.26114	-0.29019		256	-0.40852	-0.50844	-0.45282		256	-0.32179	-0.03009	-0.32156
255	-0.8881	-0.26606	-0.00954		255	0.04223	-0.00954	-0.15896		255	-0.22144	-0.25048	-0.29725		255	-0.38919	-0.48964	-0.42607		255	-0.31484	-0.03449	-0.30215
254	-0.89471	-0.2459	0.00449		254	0.04992	0.00449	-0.14361		254	-0.20246	-0.2289	-0.296		254	-0.37625	-0.45471	-0.39383		254	-0.31204	-0.04833	-0.27691
253	-0.87174	-0.24851	-0.01255		253	0.09802	-0.01255	-0.09673		253	-0.1545	-0.19372	-0.28451		253	-0.3641	-0.40636	-0.36293		253	-0.31406	-0.07684	-0.24742
252	-0.86113	-0.2879	-0.02593		252	0.11129	-0.02593	-0.07001		252	-0.1835	-0.15088	-0.26216		252	-0.33879	-0.36312	-0.35859		252	-0.31968	-0.09744	-0.21616
251	-0.85846	-0.3058	0.03504		251	0.11684	0.03504	-0.07893		251	-0.20868	-0.10658	-0.23287		251	-0.30409	-0.33202	-0.31676		251	-0.32542	-0.10823	-0.18599
250	-0.84209	-0.29702	0.03976		250	0.09291	0.03976	-0.0758		250	-0.20972	-0.07491	-0.20097		250	-0.23966	-0.33204	-0.29923		250	-0.3234	-0.09814	-0.15913
249	-0.88009	-0.2977	0.07809		249	0.06029	0.07809	-0.14596		249	-0.25955	-0.06244	-0.16509		249	-0.18386	-0.35103	-0.18236		249	-0.30261	-0.07317	-0.13444
248	-0.86721	-0.27488	0.12925		248	0.05282	0.12925	-0.16969		248	-0.22144	-0.06468	-0.12941		248	-0.12755	-0.38177	-0.12884		248	-0.2556	-0.04139	-0.10938
247	-0.83236	-0.23463	0.15149		247	0.0815	0.15149	-0.18847		247	-0.18356	-0.06986	-0.0906		247	-0.07276	-0.41575	-0.000752303		247	-0.18614	-0.00545	-0.08134
246	-0.79493	-0.22455	0.14877		246	0.09946	0.14877	-0.1727		246	-0.20224	-0.06808	-0.04714		246	-0.01833	-0.45209	0.05908		246	-0.10374	0.01167	-0.05
245	-0.80534	-0.25296	0.1226		245	0.16643	0.1226	-0.11268		245	-0.19102	-0.05271	-0.00236		245	0.02763	-0.46781	0.05355		245	-0.02632	-0.00322	-0.01886
244	-0.81577	-0.26298	0.10226		244	0.15944	0.10226	-0.08194		244	-0.25141	-0.03191	0.03645		244	0.07196	-0.48564	0.04944		244	0.02828	-0.02223	0.00611
243	-0.86959	-0.28426	0.09069		243	0.13818	0.09069	-0.05327		243	-0.27508	-0.01306	0.06055		243	0.09621	-0.4862	0.11271		243	0.05068	-0.04418	0.01759
242	-0.91838	-0.29269	0.06734		242	0.14413	0.06734	-0.05218		242	-0.32672	-0.00888	0.06773		242	0.09617	-0.48812	0.10304		242	0.04191	-0.06838	0.0105
241	-0.95556	-0.30975	0.10324		241	0.18659	0.10324	-0.06892		241	-0.41984	-0.02525	0.0626		241	0.06086	-0.48727	0.1095		241	0.0132	-0.07996	-0.01528
240	-0.99521	-0.35605	0.14718		240	0.23274	0.14718	-0.0212		240	-0.49615	-0.05655	0.0458		240	-0.000762098	-0.50428	0.04926		240	-0.02012	-0.10424	-0.05616
239	-1.01122	-0.35662	0.1482		239	0.24501	0.1482	0.01218		239	-0.6566	-0.09364	0.03011		239	-0.06558	-0.54885	0.07521		239	-0.04816	-0.13066	-0.10488
238	-1.07144	-0.42454	0.18202		238	0.27208	0.18202	0.03665		238	-0.70143	-0.12286	0.02488		238	-0.10913	-0.62198	-0.000691056		238	-0.06621	-0.18296	-0.15371
237	-1.11277	-0.46672	0.19879		237	0.25729	0.19879	0.05599		237	-0.80393	-0.14347	0.02703		237	-0.15165	-0.70637	-0.05443		237	-0.08477	-0.25672	-0.19454
236	-1.14611	-0.44724	0.2045		236	0.2125	0.2045	0.06978		236	-0.92402	-0.16633	0.02987		236	-0.18975	-0.81203	-0.16487		236	-0.11485	-0.32439	-0.2231
235	-1.20712	-0.44541	0.21969		235	0.22742	0.21969	0.07481		235	-0.92864	-0.20167	0.0289		235	-0.24757	-0.90136	-0.19948		235	-0.16883	-0.37237	-0.24067
234	-1.24641	-0.36367	0.2954		234	0.278	0.2954	0.04985		234	-0.93954	-0.26434	0.01424		234	-0.34373	-0.98688	-0.31259		234	-0.26263	-0.42063	-0.25439
233	-1.28748	-0.28853	0.33435		233	0.38261	0.33435	0.09269		233	-0.98092	-0.36987	-0.02213		233	-0.46708	-1.0835	-0.5761		233	-0.39942	-0.45791	-0.27502
232	-1.40752	-0.22037	0.41429		232	0.55676	0.41429	0.19027		232	-1.01243	-0.52561	-0.08825		232	-0.62122	-1.22518	-0.92568		232	-0.5768	-0.51972	-0.31762
231	-1.52897	-0.07279	0.48559		231	0.69795	0.48559	0.24955		231	-1.14802	-0.72906	-0.17562		231	-0.78058	-1.41435	-1.38317		231	-0.7846	-0.57904	-0.39586
230	-1.78487	0.04939	0.58867		230	0.8837	0.58867	0.34323		230	-1.28525	-0.962	-0.27612		230	-0.91986	-1.64329	-1.92665		230	-1.01641	-0.65465	-0.51802
229	-1.99816	0.1624	0.66729		229	1.03106	0.66729	0.41744		229	-1.49873	-1.2173	-0.38139		229	-1.06445	-1.92808	-2.44885		229	-1.26463	-0.74774	-0.67982
228	-2.31152	0.24188	0.7664		228	1.18357	0.7664	0.53563		228	-1.65335	-1.48168	-0.4756		228	-1.21108	-2.24059	-3.0287		228	-1.51719	-0.8499	-0.86773
227	-2.64371	0.25883	0.88149		227	1.34289	0.88149	0.51234		227	-1.87406	-1.7338	-0.54629		227	-1.36436	-2.54712	-3.48416		227	-1.77397	-0.94943	-1.05958
226	-2.97606	0.2683	0.99551		226	1.46379	0.99551	0.51357		226	-2.02533	-1.95992	-0.59814		226	-1.54106	-2.82751	-3.89987		226	-2.03659	-1.06006	-1.23161
225	-3.28575	0.28365	1.00282		225	1.60552	1.00282	0.53431		225	-2.22688	-2.15766	-0.6419		225	-1.71217	-3.05967	-4.32503		225	-2.29447	-1.17536	-1.36645
224	-3.62711	0.2155	1.15164		224	1.82466	1.15164	0.47795		224	-2.30418	-2.33012	-0.69398		224	-1.86964	-3.23649	-4.62987		224	-2.53734	-1.30851	-1.46327
223	-3.90223	0.23089	1.2221		223	1.89649	1.2221	0.4324		223	-2.48215	-2.47288	-0.76273		223	-1.98017	-3.34981	-4.8789		223	-2.75375	-1.45712	-1.53532
222	-4.21627	0.14933	1.26206		222	1.92869	1.26206	0.42075		222	-2.71551	-2.59951	-0.86045		222	-2.05112	-3.41039	-5.08424		222	-2.95223	-1.62792	-1.60473
221	-4.39917	-0.04787	1.26197		221	1.93442	1.26197	0.37557		221	-2.82351	-2.73485	-0.98059		221	-2.10468	-3.46949	-5.18662		221	-3.13068	-1.83726	-1.692
220	-4.62578	-0.26475	1.19193		220	1.85595	1.19193	0.32372		220	-2.91027	-2.89723	-1.10773		220	-2.15842	-3.53274	-5.2802		220	-3.29526	-2.09218	-1.81287
219	-4.72532	-0.67471	1.05449		219	1.61751	1.05449	0.11603		219	-3.23089	-3.09508	-1.23588		219	-2.19309	-3.60829	-5.40106		219	-3.46726	-2.38404	-1.9682
218	-4.79277	-1.16641	0.83846		218	1.37628	0.83846	-0.09561		218	-3.4812	-3.33036	-1.36441		218	-2.23156	-3.69198	-5.46669		218	-3.6547	-2.68689	-2.14668
217	-4.7726	-1.73151	0.61175		217	1.0946	0.61175	-0.38815		217	-3.81034	-3.59754	-1.49976		217	-2.26237	-3.75534	-5.49877		217	-3.84551	-3.00414	-2.33147
216	-4.76032	-2.27451	0.43009		216	0.82899	0.43009	-0.72942		216	-4.13471	-3.86476	-1.64868		216	-2.28151	-3.77756	-5.48025		216	-4.01547	-3.31019	-2.50888
215	-4.75561	-2.79807	0.21153		215	0.52403	0.21153	-1.02838		215	-4.45832	-4.081	-1.81391		215	-2.27661	-3.74926	-5.40824		215	-4.13797	-3.63157	-2.66784
214	-4.7102	-3.21383	0.04595		214	0.29218	0.04595	-1.31834		214	-4.74031	-4.23507	-1.99501		214	-2.26707	-3.68407	-5.32419		214	-4.20448	-3.90901	-2.80203
213	-4.63308	-3.71032	-0.1335		213	0.06782	-0.1335	-1.58011		213	-4.90486	-4.32091	-2.17615		213	-2.25899	-3.59708	-5.07127		213	-4.19173	-4.14521	-2.91059
212	-4.53473	-4.03746	-0.31911		212	-0.11559	-0.31911	-1.89361		212	-4.96837	-4.3584	-2.34366		212	-2.24298	-3.48354	-4.69403		212	-4.11487	-4.33553	-3.00311
211	-4.30401	-4.54329	-0.49931		211	-0.4288	-0.49931	-2.19104		211	-5.16225	-4.38706	-2.49984		211	-2.17306	-3.3392	-4.39315		211	-4.01743	-4.52523	-3.08939
210	-4.02775	-5.19867	-0.68234		210	-0.69698	-0.68234	-2.51697		210	-5.28252	-4.45026	-2.65244		210	-2.07516	-3.20611	-3.96922		210	-3.9352	-4.72556	-3.18205
209	-3.66657	-5.91831	-0.92027		209	-1.11144	-0.92027	-2.94881		209	-5.56072	-4.58206	-2.82856		209	-1.9771	-3.04628	-3.5654		209	-3.88581	-4.97162	-3.29662
208	-3.3254	-6.47812	-1.25662		208	-1.56009	-1.25662	-3.44943		208	-5.73356	-4.77115	-3.04818		208	-1.8915	-2.87395	-3.26271		208	-3.87928	-5.2584	-3.44887
207	-2.90844	-7.28303	-1.60564		207	-2.07151	-1.60564	-3.93402		207	-6.07882	-5.00382	-3.33358		207	-1.8306	-2.69598	-2.98389		207	-3.90359	-5.59137	-3.64897
206	-2.43256	-7.93793	-1.95889		206	-2.65523	-1.95889	-4.45855		206	-6.39856	-5.27559	-3.68811		206	-1.8055	-2.54673	-2.80327		206	-3.94844	-5.90024	-3.89165
205	-2.03207	-8.79888	-2.37568		205	-3.30723	-2.37568	-4.95055		205	-6.68468	-5.56009	-4.09174		205	-1.82412	-2.40517	-2.50895		205	-3.9762	-6.19763	-4.15953
204	-1.60378	-9.59593	-2.74267		204	-3.83447	-2.74267	-5.48895		204	-6.85891	-5.8235	-4.49789		204	-1.85171	-2.25008	-2.29376		204	-4.0024	-6.45404	-4.42697
203	-1.288	-10.4544	-3.0959		203	-4.33507	-3.0959	-5.78638		203	-7.13494	-6.05638	-4.84622		203	-1.88803	-2.0897	-2.13163		203	-4.02375	-6.63189	-4.65059
202	-0.93971	-11.1436	-3.36856		202	-4.65813	-3.36856	-6.09685		202	-7.19277	-6.20981	-5.07478		202	-1.92009	-1.93986	-2.04676		202	-4.03259	-6.7448	-4.78164
201	-0.6551	-11.3611	-3.54949		201	-4.89775	-3.54949	-6.29135		201	-7.30789	-6.16873	-5.16333		201	-1.93597	-1.74073	-1.79242		201	-3.93621	-6.7365	-4.77873
200	-0.38426	-11.2654	-3.62263		200	-4.84432	-3.62263	-6.19634		200	-7.06301	-5.90187	-5.10632		200	-1.9087	-1.40846	-1.53225		200	-3.74547	-6.53513	-4.61815
199	-0.03085	-10.4609	-3.42767		199	-4.56406	-3.42767	-5.92791		199	-6.2045	-5.48035	-4.93224		199	-1.76843	-1.00625	-1.32984		199	-3.50967	-6.01136	-4.30672
198	0.26898	-9.12143	-3.0403		198	-4.23024	-3.0403	-5.48126		198	-5.2417	-4.99321	-4.66538		198	-1.60945	-0.62197	-1.1176		198	-3.30439	-5.44883	-3.87592
197	0.64634	-8.32656	-2.61037		197	-3.77946	-2.61037	-4.62869		197	-4.66743	-4.54389	-4.31116		197	-1.55385	-0.29332	-0.80472		197	-3.21151	-4.33413	-3.38744
196	1.02727	-8.66261	-2.23293		196	-3.25395	-2.23293	-4.01089		196	-3.92188	-3.99586	-3.82032		196	-1.48189	-0.0041	-0.69201		196	-3.09711	-2.90068	-2.93272
195	1.44307	-7.02694	-2.03461		195	-2.85452	-2.03461	-3.75196		195	-4.02582	-3.17213	-3.12148		195	-1.264	0.27088	-0.09854		195	-2.74051	-1.44911	-2.59193
194	0.94705	-4.5476	-1.87063		194	-2.50361	-1.87063	-3.84649		194	-1.12961	-1.81471	-2.14269		194	-0.70832	0.59886	-0.37361		194	-1.89127	-0.38466	-2.42508
193	1.02557	-2.6701	-1.94639		193	-2.41612	-1.94639	-3.96964		193	1.36949	0.59611	-0.79493		193	0.59254	1.20055	-0.18707		193	-0.01671	-0.42974	-2.5005
192	0.83292	2.48627	-1.92641		192	-2.47583	-1.92641	-4.72157		192	4.46548	3.73686	0.85625		192	2.37857	1.95208	0.04361		192	2.55081	-1.09475	-2.76215
191	0.57415	2.32135	-1.74871		191	-2.68133	-1.74871	-3.75133		191	8.15836	7.60754	2.81087		191	4.64978	2.85345	0.31845		191	5.81128	-2.37968	-3.21004
190	8.42608	-0.84756	-2.26542		190	-4.01556	-2.26542	-2.83038		190	12.4481	12.2081	5.06891		190	7.40615	3.90468	0.63744		190	9.76471	-4.28454	-3.84417

## Sheet: Fig. 2
a1													a2						a3						a4
20.0091	281		20.0091	288		20.0091	311		20.0115	380.612			20.0115	61299		20.0115	4756.76		20.0115	1220.21	317.195	-94.8514	-429.614		20.0115	745.037	149.543	31.8141	-58.0396
20.0222	330		20.0222	267		20.0222	301		20.0246	382.412			20.0246	57549		20.0246	6490.1		20.0246	1202.21	290.195	-58.8514	-447.614		20.0246	748.37	139.543	23.3141	-58.0396
20.0353	264		20.0353	287		20.0353	300		20.0377	380.912			20.0377	63049		20.0377	3690.1		20.0377	1253.21	317.195	-109.851	-398.114		20.0377	716.703	123.543	9.31409	-65.373
20.0485	303		20.0485	273		20.0485	330		20.0509	377.012			20.0509	55299		20.0509	7690.1		20.0509	1241.21	297.695	-93.3514	-407.114		20.0509	718.37	137.043	1.31409	-56.7063
20.0616	274		20.0616	280		20.0616	301		20.064	380.312			20.064	63049		20.064	5423.43		20.064	1226.21	314.195	-112.851	-419.114		20.064	766.703	142.043	10.8141	-62.7063
20.0747	292		20.0747	278		20.0747	296		20.0771	378.512			20.0771	61549		20.0771	5023.43		20.0771	1292.21	311.195	-115.851	-420.614		20.0771	731.703	133.543	25.8141	-56.7063
20.0879	313		20.0879	274		20.0879	297		20.0903	380.612			20.0903	59799		20.0903	1823.43		20.0903	1259.21	296.195	-78.3514	-423.614		20.0903	738.37	139.043	40.3141	-61.373
20.101	308		20.101	279		20.101	314		20.1034	379.112			20.1034	53049		20.1034	2356.76		20.1034	1196.21	329.195	-123.351	-339.614		20.1034	703.37	145.543	23.3141	-58.0396
20.1141	321		20.1141	297		20.1141	321		20.1165	380.312			20.1165	58799		20.1165	4090.1		20.1165	1268.21	279.695	-142.851	-419.114		20.1165	711.703	136.043	23.3141	-62.0396
20.1273	311		20.1273	272		20.1273	293		20.1297	381.512			20.1297	61799		20.1297	5823.43		20.1297	1298.21	311.195	-132.351	-395.114		20.1297	725.037	123.543	20.3141	-68.7063
20.1404	263		20.1404	268		20.1404	289		20.1428	379.412			20.1428	61799		20.1428	7556.76		20.1428	1223.21	278.195	-94.8514	-368.114		20.1428	735.037	140.543	26.3141	-63.373
20.1535	270		20.1535	295		20.1535	295		20.1559	377.312			20.1559	57049		20.1559	4356.76		20.1559	1226.21	341.195	-69.3514	-387.614		20.1559	728.37	142.543	26.3141	-63.7063
20.1666	275		20.1666	283		20.1666	303		20.169	369.512			20.169	63299		20.169	6223.43		20.169	1202.21	291.695	-153.351	-386.114		20.169	730.037	137.543	28.8141	-62.373
20.1798	274		20.1798	268		20.1798	302		20.1822	380.912			20.1822	54799		20.1822	5023.43		20.1822	1244.21	293.195	-48.3514	-414.614		20.1822	711.703	117.043	10.3141	-63.373
20.1929	301		20.1929	301		20.1929	290		20.1953	378.512			20.1953	57549		20.1953	7023.43		20.1953	1217.21	264.695	-57.3514	-384.614		20.1953	728.37	133.543	8.31409	-50.7063
20.206	330		20.206	300		20.206	270		20.2084	377.612			20.2084	63049		20.2084	3690.1		20.2084	1232.21	306.695	-58.8514	-365.114		20.2084	735.037	146.543	18.3141	-67.7063
20.2192	309		20.2192	291		20.2192	259		20.2216	374.012			20.2216	66799		20.2216	3156.76		20.2216	1256.21	297.695	-63.3514	-390.614		20.2216	701.703	137.043	1.31409	-67.7063
20.2323	302		20.2323	279		20.2323	282		20.2347	377.012			20.2347	60299		20.2347	4490.1		20.2347	1193.21	315.695	-79.8514	-363.614		20.2347	716.703	129.043	24.3141	-75.7063
20.2454	271		20.2454	260		20.2454	327		20.2478	375.512			20.2478	58549		20.2478	9690.1		20.2478	1232.21	312.695	-94.8514	-381.614		20.2478	731.703	138.043	15.3141	-55.7063
20.2585	308		20.2585	255		20.2585	297		20.261	382.712			20.261	63549		20.261	2490.1		20.261	1244.21	315.695	-118.851	-383.114		20.261	720.037	130.543	28.8141	-70.7063
20.2717	299		20.2717	293		20.2717	295		20.2741	376.712			20.2741	56299		20.2741	9956.76		20.2741	1241.21	320.195	-90.3514	-402.614		20.2741	741.703	139.543	20.3141	-65.373
20.2848	280		20.2848	292		20.2848	284		20.2872	374.312			20.2872	62799		20.2872	7023.43		20.2872	1223.21	324.695	-154.851	-365.114		20.2872	745.037	116.543	21.8141	-64.7063
20.2979	326		20.2979	259		20.2979	310		20.3003	374.312			20.3003	63299		20.3003	6623.43		20.3003	1202.21	330.695	-79.8514	-384.614		20.3003	735.037	154.043	19.8141	-63.7063
20.3111	293		20.3111	286		20.3111	317		20.3135	376.712			20.3135	59299		20.3135	5556.76		20.3135	1226.21	290.195	-90.3514	-398.114		20.3135	743.37	137.043	25.3141	-64.7063
20.3242	308		20.3242	298		20.3242	319		20.3266	370.112			20.3266	54549		20.3266	6890.1		20.3266	1253.21	321.695	-72.3514	-426.614		20.3266	721.703	153.043	23.3141	-63.7063
20.3373	276		20.3373	277		20.3373	305		20.3397	380.012			20.3397	58299		20.3397	3956.76		20.3397	1247.21	320.195	-85.8514	-362.114		20.3397	746.703	146.543	3.81409	-64.7063
20.3505	280		20.3505	258		20.3505	288		20.3529	379.112			20.3529	57299		20.3529	9823.43		20.3529	1253.21	318.695	-127.851	-414.614		20.3529	715.037	132.543	33.3141	-71.0396
20.3636	294		20.3636	290		20.3636	286		20.366	386.612			20.366	63049		20.366	6490.1		20.366	1247.21	308.195	-126.351	-371.114		20.366	743.37	142.543	10.3141	-62.373
20.3767	305		20.3767	269		20.3767	313		20.3791	375.512			20.3791	57799		20.3791	3290.1		20.3791	1232.21	345.695	-69.3514	-395.114		20.3791	703.37	140.043	22.8141	-63.0396
20.3899	303		20.3899	270		20.3899	308		20.3923	377.312			20.3923	58549		20.3923	6223.43		20.3923	1241.21	365.195	-114.351	-359.114		20.3923	740.037	136.043	11.8141	-66.7063
20.403	303		20.403	286		20.403	275		20.4054	378.212			20.4054	60049		20.4054	1156.76		20.4054	1229.21	327.695	-61.8514	-387.614		20.4054	723.37	152.543	7.31409	-63.7063
20.4161	287		20.4161	290		20.4161	283		20.4185	379.112			20.4185	55549		20.4185	6890.1		20.4185	1241.21	330.695	-91.8514	-386.114		20.4185	720.037	142.043	24.3141	-60.373
20.4292	336		20.4292	248		20.4292	303		20.4317	379.712			20.4317	54049		20.4317	5290.1		20.4317	1298.21	347.195	-118.851	-413.114		20.4317	741.703	149.543	0.31409	-68.7063
20.4424	289		20.4424	242		20.4424	340		20.4448	380.612			20.4448	55299		20.4448	756.763		20.4448	1253.21	323.195	-87.3514	-434.114		20.4448	780.037	146.043	21.8141	-68.0396
20.4555	291		20.4555	256		20.4555	286		20.4579	386.912			20.4579	58549		20.4579	2756.76		20.4579	1211.21	309.695	-85.8514	-350.114		20.4579	726.703	137.543	9.31409	-70.0396
20.4686	284		20.4686	264		20.4686	277		20.471	381.812			20.471	58549		20.471	6223.43		20.471	1235.21	347.195	-124.851	-435.614		20.471	718.37	129.543	-1.68591	-69.373
20.4818	274		20.4818	235		20.4818	300		20.4842	372.512			20.4842	58049		20.4842	5423.43		20.4842	1220.21	314.195	-91.8514	-417.614		20.4842	733.37	143.543	24.3141	-68.0396
20.4949	326		20.4949	278		20.4949	279		20.4973	378.812			20.4973	59549		20.4973	3290.1		20.4973	1241.21	353.195	-108.351	-365.114		20.4973	733.37	145.543	34.8141	-61.373
20.508	286		20.508	301		20.508	305		20.5104	377.312			20.5104	54549		20.5104	9823.43		20.5104	1193.21	312.695	-127.851	-354.614		20.5104	721.703	146.543	25.3141	-67.7063
20.5212	301		20.5212	283		20.5212	302		20.5236	384.812			20.5236	63049		20.5236	3690.1		20.5236	1202.21	344.195	-103.851	-333.614		20.5236	721.703	136.043	29.8141	-68.0396
20.5343	293		20.5343	259		20.5343	285		20.5367	379.712			20.5367	59049		20.5367	2490.1		20.5367	1235.21	332.195	-88.8514	-368.114		20.5367	725.037	128.543	25.8141	-65.7063
20.5474	300		20.5474	260		20.5474	319		20.5498	381.212			20.5498	59049		20.5498	756.763		20.5498	1232.21	366.695	-85.8514	-432.614		20.5498	710.037	149.543	19.3141	-65.0396
20.5605	275		20.5605	319		20.5605	304		20.563	376.712			20.563	62299		20.563	4490.1		20.563	1226.21	311.195	-135.351	-351.614		20.563	728.37	150.043	30.3141	-61.373
20.5737	295		20.5737	261		20.5737	265		20.5761	379.112			20.5761	58299		20.5761	2356.76		20.5761	1205.21	287.195	-87.3514	-411.614		20.5761	730.037	137.543	10.3141	-62.373
20.5868	256		20.5868	301		20.5868	289		20.5892	381.812			20.5892	59799		20.5892	6356.76		20.5892	1232.21	342.695	-85.8514	-371.114		20.5892	721.703	147.043	13.3141	-66.373
20.5999	304		20.5999	260		20.5999	282		20.6023	382.112			20.6023	62799		20.6023	1690.1		20.6023	1217.21	342.695	-78.3514	-398.114		20.6023	706.703	146.043	9.31409	-66.7063
20.6131	305		20.6131	240		20.6131	314		20.6155	377.612			20.6155	60049		20.6155	4223.43		20.6155	1283.21	378.695	-79.8514	-339.614		20.6155	711.703	136.043	13.3141	-63.373
20.6262	307		20.6262	278		20.6262	300		20.6286	377.012			20.6286	59299		20.6286	3690.1		20.6286	1181.21	317.195	-120.351	-312.614		20.6286	691.703	139.043	13.3141	-63.373
20.6393	304		20.6393	241		20.6393	271		20.6417	375.212			20.6417	57299		20.6417	3823.43		20.6417	1250.21	375.695	-82.8514	-362.114		20.6417	733.37	142.543	6.81409	-67.7063
20.6525	352		20.6525	272		20.6525	294		20.6549	383.012			20.6549	56299		20.6549	3956.76		20.6549	1238.21	354.695	-90.3514	-363.614		20.6549	691.703	161.043	24.8141	-62.373
20.6656	289		20.6656	267		20.6656	286		20.668	388.712			20.668	53049		20.668	6756.76		20.668	1208.21	335.195	-108.351	-383.114		20.668	725.037	129.043	29.3141	-66.0396
20.6787	248		20.6787	274		20.6787	305		20.6811	380.612			20.6811	58299		20.6811	9156.76		20.6811	1229.21	380.195	-109.851	-320.114		20.6811	725.037	152.543	21.3141	-62.373
20.6918	299		20.6918	289		20.6918	310		20.6943	376.712			20.6943	57299		20.6943	5823.43		20.6943	1262.21	339.695	-118.851	-344.114		20.6943	705.037	152.043	29.3141	-75.373
20.705	302		20.705	266		20.705	287		20.7074	381.212			20.7074	54799		20.7074	2623.43		20.7074	1220.21	335.195	-79.8514	-357.614		20.7074	716.703	149.543	24.8141	-62.373
20.7181	315		20.7181	294		20.7181	277		20.7205	384.212			20.7205	61549		20.7205	6490.1		20.7205	1196.21	371.195	-94.8514	-396.614		20.7205	733.37	136.043	26.3141	-63.0396
20.7312	294		20.7312	292		20.7312	318		20.7336	381.812			20.7336	59299		20.7336	2356.76		20.7336	1193.21	363.695	-108.351	-354.614		20.7336	683.37	140.543	12.8141	-67.373
20.7444	304		20.7444	280		20.7444	284		20.7468	379.412			20.7468	55799		20.7468	1156.76		20.7468	1244.21	363.695	-163.851	-324.614		20.7468	716.703	138.043	34.8141	-56.7063
20.7575	283		20.7575	289		20.7575	292		20.7599	380.612			20.7599	60299		20.7599	2756.76		20.7599	1208.21	368.195	-72.3514	-362.114		20.7599	725.037	143.043	32.8141	-62.7063
20.7706	275		20.7706	313		20.7706	285		20.773	383.912			20.773	61049		20.773	7556.76		20.773	1202.21	338.195	-69.3514	-351.614		20.773	758.37	129.043	27.8141	-59.373
20.7838	328		20.7838	260		20.7838	334		20.7862	381.512			20.7862	54049		20.7862	7690.1		20.7862	1226.21	332.195	-51.3514	-308.114		20.7862	723.37	139.543	21.3141	-56.373
20.7969	280		20.7969	264		20.7969	307		20.7993	381.212			20.7993	58799		20.7993	2356.76		20.7993	1274.21	332.195	-75.3514	-297.614		20.7993	706.703	157.543	11.3141	-62.0396
20.81	283		20.81	284		20.81	312		20.8124	382.412			20.8124	56049		20.8124	6756.76		20.8124	1214.21	347.195	-130.851	-342.614		20.8124	728.37	141.043	23.3141	-65.373
20.8232	269		20.8232	256		20.8232	280		20.8256	374.012			20.8256	53549		20.8256	5023.43		20.8256	1220.21	359.195	-76.8514	-365.114		20.8256	730.037	157.043	20.3141	-58.0396
20.8363	294		20.8363	232		20.8363	300		20.8387	380.012			20.8387	53799		20.8387	6890.1		20.8387	1232.21	366.695	-139.851	-350.114		20.8387	731.703	140.043	26.8141	-57.7063
20.8494	262		20.8494	259		20.8494	304		20.8518	379.112			20.8518	61049		20.8518	7956.76		20.8518	1238.21	354.695	-124.851	-360.614		20.8518	731.703	135.043	9.81409	-65.373
20.8625	292		20.8625	269		20.8625	283		20.865	388.712			20.865	60549		20.865	6623.43		20.865	1253.21	411.695	-55.8514	-369.614		20.865	713.37	121.543	9.31409	-61.7063
20.8757	266		20.8757	272		20.8757	298		20.8781	380.612			20.8781	62799		20.8781	4623.43		20.8781	1175.21	353.195	-123.351	-368.114		20.8781	728.37	141.543	15.3141	-58.373
20.8888	262		20.8888	283		20.8888	313		20.8912	383.612			20.8912	57299		20.8912	8623.43		20.8912	1241.21	354.695	-79.8514	-362.114		20.8912	698.37	143.543	29.8141	-69.0396
20.9019	300		20.9019	264		20.9019	286		20.9043	380.012			20.9043	63299		20.9043	6223.43		20.9043	1199.21	350.195	-79.8514	-371.114		20.9043	710.037	140.543	22.3141	-54.373
20.9151	283		20.9151	274		20.9151	291		20.9175	374.312			20.9175	58799		20.9175	6356.76		20.9175	1187.21	360.695	-93.3514	-393.614		20.9175	736.703	130.543	42.8141	-59.373
20.9282	271		20.9282	236		20.9282	284		20.9306	381.212			20.9306	56799		20.9306	4356.76		20.9306	1229.21	362.195	-109.851	-417.614		20.9306	738.37	146.043	29.8141	-65.7063
20.9413	298		20.9413	291		20.9413	288		20.9437	382.112			20.9437	57799		20.9437	-309.904		20.9437	1166.21	359.195	-94.8514	-359.114		20.9437	756.703	144.043	22.3141	-62.7063
20.9545	300		20.9545	282		20.9545	287		20.9569	379.112			20.9569	57299		20.9569	5156.76		20.9569	1226.21	350.195	-75.3514	-357.614		20.9569	711.703	150.543	21.3141	-66.7063
20.9676	296		20.9676	290		20.9676	280		20.97	380.312			20.97	60049		20.97	3823.43		20.97	1253.21	372.695	-91.8514	-342.614		20.97	771.703	136.543	28.8141	-63.7063
20.9807	319		20.9807	274		20.9807	268		20.9831	384.812			20.9831	55799		20.9831	4223.43		20.9831	1235.21	333.695	-103.851	-410.114		20.9831	741.703	130.543	25.8141	-55.7063
20.9938	265		20.9938	265		20.9938	306		20.9962	385.412			20.9962	65549		20.9962	4490.1		20.9962	1256.21	351.695	-91.8514	-354.614		20.9962	711.703	142.543	14.8141	-64.373
21.007	278		21.007	256		21.007	284		21.0094	380.012			21.0094	53549		21.0094	11156.8		21.0094	1214.21	344.195	-85.8514	-369.614		21.0094	745.037	140.543	30.8141	-62.0396
21.0201	300		21.0201	237		21.0201	283		21.0225	384.512			21.0225	54299		21.0225	6756.76		21.0225	1271.21	314.195	-103.851	-384.614		21.0225	738.37	145.043	28.8141	-62.7063
21.0332	308		21.0332	291		21.0332	279		21.0356	380.612			21.0356	54549		21.0356	5956.76		21.0356	1202.21	348.695	-51.3514	-354.614		21.0356	750.037	146.543	23.3141	-67.7063
21.0464	268		21.0464	269		21.0464	310		21.0488	376.112			21.0488	59049		21.0488	7690.1		21.0488	1235.21	329.195	-120.351	-354.614		21.0488	731.703	144.543	9.31409	-64.7063
21.0595	295		21.0595	256		21.0595	285		21.0619	380.012			21.0619	62049		21.0619	5023.43		21.0619	1250.21	327.695	-73.8514	-351.614		21.0619	733.37	134.043	18.8141	-60.373
21.0726	297		21.0726	283		21.0726	289		21.075	386.912			21.075	53299		21.075	5556.76		21.075	1196.21	350.195	-84.3514	-332.114		21.075	710.037	138.043	31.8141	-61.373
21.0858	298		21.0858	244		21.0858	290		21.0882	380.312			21.0882	52049		21.0882	7956.76		21.0882	1235.21	315.695	-136.851	-407.114		21.0882	696.703	114.543	22.3141	-64.7063
21.0989	261		21.0989	267		21.0989	274		21.1013	380.312			21.1013	58049		21.1013	5823.43		21.1013	1247.21	351.695	-61.8514	-371.114		21.1013	713.37	150.043	21.3141	-62.7063
21.112	293		21.112	263		21.112	291		21.1144	381.812			21.1144	58549		21.1144	8090.1		21.1144	1211.21	350.195	-70.8514	-420.614		21.1144	713.37	145.543	25.3141	-60.7063
21.1252	256		21.1252	268		21.1252	288		21.1275	379.712			21.1275	55299		21.1275	3956.76		21.1275	1181.21	297.695	-87.3514	-353.114		21.1275	710.037	135.043	19.3141	-64.373
21.1383	263		21.1383	259		21.1383	256		21.1407	383.012			21.1407	52549		21.1407	6356.76		21.1407	1229.21	320.195	-121.851	-390.614		21.1407	733.37	134.543	11.3141	-53.7063
21.1514	297		21.1514	274		21.1514	278		21.1538	381.212			21.1538	62299		21.1538	2090.1		21.1538	1235.21	318.695	-61.8514	-363.614		21.1538	725.037	149.043	29.8141	-64.0396
21.1645	298		21.1645	282		21.1645	318		21.1669	374.012			21.1669	59799		21.1669	11556.8		21.1669	1199.21	335.195	-55.8514	-359.114		21.1669	708.37	140.043	22.8141	-58.7063
21.1777	281		21.1777	279		21.1777	290		21.1801	377.912			21.1801	61799		21.1801	8890.1		21.1801	1160.21	353.195	-75.3514	-381.614		21.1801	728.37	136.543	25.8141	-61.373
21.1908	295		21.1908	249		21.1908	290		21.1932	385.712			21.1932	57549		21.1932	5823.43		21.1932	1196.21	369.695	-90.3514	-441.614		21.1932	735.037	137.543	27.3141	-65.0396
21.2039	324		21.2039	260		21.2039	299		21.2063	377.012			21.2063	58049		21.2063	5290.1		21.2063	1202.21	285.695	-106.851	-371.114		21.2063	741.703	133.543	15.3141	-64.7063
21.2171	294		21.2171	259		21.2171	287		21.2195	386.012			21.2195	57799		21.2195	7290.1		21.2195	1217.21	359.195	-106.851	-425.114		21.2195	705.037	147.043	22.3141	-60.373
21.2302	263		21.2302	246		21.2302	294		21.2326	384.512			21.2326	54799		21.2326	4890.1		21.2326	1199.21	342.695	-118.851	-392.114		21.2326	720.037	130.043	13.3141	-66.7063
21.2433	272		21.2433	246		21.2433	274		21.2457	377.312			21.2457	65549		21.2457	6490.1		21.2457	1223.21	348.695	-135.351	-414.614		21.2457	735.037	132.043	22.3141	-65.373
21.2565	292		21.2565	248		21.2565	282		21.2589	378.812			21.2589	56049		21.2589	8890.1		21.2589	1208.21	296.195	-139.851	-387.614		21.2589	713.37	144.543	25.3141	-71.0396
21.2696	274		21.2696	271		21.2696	292		21.272	379.112			21.272	55799		21.272	7023.43		21.272	1217.21	326.195	-151.851	-393.614		21.272	725.037	140.043	35.8141	-59.373
21.2827	238		21.2827	269		21.2827	265		21.2851	377.912			21.2851	55549		21.2851	6756.76		21.2851	1190.21	348.695	-108.351	-395.114		21.2851	745.037	129.543	15.3141	-62.7063
21.2959	256		21.2959	257		21.2959	292		21.2982	389.612			21.2982	57299		21.2982	3156.76		21.2982	1256.21	308.195	-151.851	-366.614		21.2982	718.37	130.543	8.81409	-66.0396
21.309	276		21.309	269		21.309	273		21.3114	375.812			21.3114	55549		21.3114	7690.1		21.3114	1244.21	347.195	-64.8514	-452.114		21.3114	730.037	136.543	14.3141	-66.0396
21.3221	292		21.3221	267		21.3221	328		21.3245	383.012			21.3245	58299		21.3245	10356.8		21.3245	1208.21	303.695	-88.8514	-408.614		21.3245	695.037	121.543	0.81409	-63.7063
21.3352	286		21.3352	266		21.3352	296		21.3376	387.212			21.3376	53799		21.3376	6490.1		21.3376	1181.21	303.695	-138.351	-432.614		21.3376	733.37	133.043	8.81409	-71.0396
21.3484	278		21.3484	276		21.3484	314		21.3508	378.812			21.3508	60299		21.3508	5423.43		21.3508	1232.21	257.195	-114.351	-417.614		21.3508	705.037	149.543	31.3141	-63.0396
21.3615	290		21.3615	265		21.3615	297		21.3639	389.012			21.3639	57549		21.3639	10490.1		21.3639	1181.21	299.195	-154.851	-416.114		21.3639	703.37	144.043	36.3141	-64.373
21.3746	275		21.3746	260		21.3746	250		21.377	384.812			21.377	61799		21.377	2756.76		21.377	1244.21	281.195	-90.3514	-374.114		21.377	713.37	150.543	20.8141	-60.7063
21.3878	278		21.3878	261		21.3878	287		21.3902	381.512			21.3902	54799		21.3902	6623.43		21.3902	1244.21	294.695	-139.851	-374.114		21.3902	731.703	142.543	21.3141	-61.373
21.4009	291		21.4009	235		21.4009	296		21.4033	378.512			21.4033	56549		21.4033	5156.76		21.4033	1190.21	294.695	-175.851	-410.114		21.4033	716.703	134.043	14.3141	-71.7063
21.414	294		21.414	279		21.414	305		21.4164	382.712			21.4164	57299		21.4164	5290.1		21.4164	1175.21	270.695	-75.3514	-398.114		21.4164	716.703	131.543	13.3141	-62.0396
21.4272	274		21.4272	256		21.4272	290		21.4295	380.612			21.4295	57049		21.4295	7156.76		21.4295	1223.21	266.195	-85.8514	-447.614		21.4295	721.703	117.043	31.3141	-65.373
21.4403	323		21.4403	276		21.4403	296		21.4427	383.612			21.4427	58049		21.4427	4223.43		21.4427	1187.21	263.195	-147.351	-435.614		21.4427	690.037	157.543	25.3141	-63.0396
21.4534	265		21.4534	272		21.4534	278		21.4558	378.212			21.4558	57049		21.4558	5556.76		21.4558	1217.21	290.195	-105.351	-392.114		21.4558	741.703	135.543	25.3141	-64.373
21.4665	321		21.4665	270		21.4665	286		21.4689	376.712			21.4689	63049		21.4689	6756.76		21.4689	1286.21	266.195	-141.351	-407.114		21.4689	715.037	140.043	3.31409	-70.0396
21.4797	280		21.4797	269		21.4797	279		21.4821	381.512			21.4821	51799		21.4821	7023.43		21.4821	1187.21	287.195	-114.351	-417.614		21.4821	750.037	139.043	28.3141	-61.373
21.4928	264		21.4928	246		21.4928	280		21.4952	377.012			21.4952	53799		21.4952	5023.43		21.4952	1256.21	335.195	-108.351	-395.114		21.4952	690.037	141.543	20.3141	-65.7063
21.5059	300		21.5059	268		21.5059	303		21.5083	378.812			21.5083	61299		21.5083	11156.8		21.5083	1190.21	255.695	-111.351	-425.114		21.5083	696.703	131.543	23.8141	-70.7063
21.5191	308		21.5191	272		21.5191	300		21.5215	386.012			21.5215	56049		21.5215	7823.43		21.5215	1175.21	275.195	-82.8514	-356.114		21.5215	701.703	130.043	19.3141	-61.373
21.5322	265		21.5322	283		21.5322	286		21.5346	382.412			21.5346	57299		21.5346	7156.76		21.5346	1193.21	281.195	-121.851	-440.114		21.5346	768.37	148.043	19.8141	-69.7063
21.5453	275		21.5453	260		21.5453	309		21.5477	376.712			21.5477	53799		21.5477	10223.4		21.5477	1199.21	276.695	-132.351	-443.114		21.5477	685.037	131.543	15.3141	-64.0396
21.5585	289		21.5585	245		21.5585	314		21.5608	380.012			21.5608	57799		21.5608	7290.1		21.5608	1220.21	309.695	-139.851	-440.114		21.5608	703.37	141.043	33.8141	-64.0396
21.5716	290		21.5716	247		21.5716	290		21.574	383.912			21.574	52299		21.574	9156.76		21.574	1193.21	264.695	-138.351	-404.114		21.574	723.37	129.043	11.3141	-61.7063
21.5847	268		21.5847	236		21.5847	301		21.5871	381.812			21.5871	59299		21.5871	8623.43		21.5871	1196.21	266.195	-78.3514	-440.114		21.5871	708.37	148.543	15.3141	-62.7063
21.5978	295		21.5978	273		21.5978	300		21.6002	379.112			21.6002	59799		21.6002	7023.43		21.6002	1202.21	272.195	-145.851	-420.614		21.6002	723.37	120.043	13.3141	-58.0396
21.611	258		21.611	264		21.611	303		21.6134	383.612			21.6134	56549		21.6134	5423.43		21.6134	1217.21	273.695	-120.351	-426.614		21.6134	711.703	138.543	18.3141	-69.0396
21.6241	309		21.6241	226		21.6241	307		21.6265	381.212			21.6265	57299		21.6265	5556.76		21.6265	1238.21	239.195	-136.851	-428.114		21.6265	698.37	123.043	20.3141	-64.7063
21.6372	303		21.6372	255		21.6372	321		21.6396	386.012			21.6396	54549		21.6396	6223.43		21.6396	1133.21	260.195	-136.851	-480.614		21.6396	700.037	132.043	27.8141	-70.373
21.6504	284		21.6504	263		21.6504	317		21.6528	390.212			21.6528	54799		21.6528	6090.1		21.6528	1199.21	255.695	-114.351	-453.614		21.6528	683.37	144.543	22.8141	-67.373
21.6635	240		21.6635	262		21.6635	238		21.6659	378.212			21.6659	52549		21.6659	6756.76		21.6659	1244.21	291.695	-112.851	-435.614		21.6659	718.37	136.543	22.8141	-66.373
21.6766	294		21.6766	274		21.6766	294		21.679	373.412			21.679	54799		21.679	4223.43		21.679	1190.21	266.195	-127.851	-441.614		21.679	715.037	123.043	13.3141	-67.0396
21.6898	275		21.6898	263		21.6898	283		21.6922	389.312			21.6922	52799		21.6922	4356.76		21.6922	1250.21	270.695	-124.851	-365.114		21.6922	720.037	138.043	18.3141	-62.7063
21.7029	277		21.7029	257		21.7029	288		21.7053	379.712			21.7053	56049		21.7053	10623.4		21.7053	1238.21	246.695	-78.3514	-459.614		21.7053	710.037	143.043	18.8141	-65.373
21.716	275		21.716	261		21.716	288		21.7184	379.112			21.7184	60549		21.7184	7556.76		21.7184	1244.21	237.695	-123.351	-443.114		21.7184	700.037	144.043	18.8141	-71.0396
21.7292	301		21.7292	267		21.7292	266		21.7315	384.812			21.7315	54299		21.7315	4223.43		21.7315	1214.21	234.695	-132.351	-440.114		21.7315	731.703	131.543	12.8141	-75.7063
21.7423	290		21.7423	295		21.7423	297		21.7447	382.712			21.7447	60299		21.7447	7956.76		21.7447	1205.21	315.695	-141.351	-446.114		21.7447	698.37	117.543	23.8141	-68.7063
21.7554	270		21.7554	273		21.7554	264		21.7578	376.412			21.7578	58549		21.7578	2223.43		21.7578	1220.21	276.695	-120.351	-425.114		21.7578	718.37	122.043	3.81409	-69.0396
21.7685	263		21.7685	299		21.7685	291		21.7709	381.512			21.7709	55799		21.7709	10356.8		21.7709	1205.21	237.695	-127.851	-449.114		21.7709	705.037	123.543	20.3141	-69.7063
21.7817	255		21.7817	275		21.7817	286		21.7841	379.712			21.7841	59049		21.7841	5156.76		21.7841	1202.21	251.195	-115.851	-452.114		21.7841	711.703	132.043	9.31409	-72.7063
21.7948	279		21.7948	264		21.7948	260		21.7972	374.912			21.7972	57549		21.7972	10356.8		21.7972	1262.21	267.695	-142.851	-437.114		21.7972	713.37	119.543	13.8141	-63.0396
21.8079	283		21.8079	273		21.8079	261		21.8103	378.512			21.8103	56549		21.8103	4623.43		21.8103	1226.21	303.695	-87.3514	-422.114		21.8103	685.037	133.043	19.8141	-64.0396
21.8211	260		21.8211	261		21.8211	275		21.8235	380.912			21.8235	60049		21.8235	4623.43		21.8235	1205.21	288.695	-145.851	-414.614		21.8235	688.37	132.543	33.3141	-61.373
21.8342	301		21.8342	265		21.8342	295		21.8366	378.512			21.8366	52549		21.8366	6356.76		21.8366	1226.21	282.695	-121.851	-456.614		21.8366	703.37	138.043	4.31409	-65.7063
21.8473	302		21.8473	298		21.8473	274		21.8497	383.012			21.8497	49799		21.8497	7556.76		21.8497	1214.21	234.695	-115.851	-435.614		21.8497	701.703	115.543	21.8141	-65.0396
21.8605	301		21.8605	287		21.8605	281		21.8629	376.112			21.8629	56049		21.8629	3956.76		21.8629	1199.21	303.695	-124.851	-437.114		21.8629	716.703	138.543	26.3141	-63.373
21.8736	266		21.8736	249		21.8736	285		21.876	381.812			21.876	55799		21.876	4090.1		21.876	1217.21	284.195	-118.851	-455.114		21.876	718.37	135.043	8.31409	-65.7063
21.8867	269		21.8867	289		21.8867	283		21.8891	381.812			21.8891	51549		21.8891	6356.76		21.8891	1232.21	266.195	-112.851	-444.614		21.8891	705.037	140.543	33.8141	-68.0396
21.8998	280		21.8998	289		21.8998	266		21.9022	377.912			21.9022	57799		21.9022	10356.8		21.9022	1214.21	230.195	-111.351	-426.614		21.9022	728.37	135.043	35.8141	-61.373
21.913	273		21.913	258		21.913	281		21.9154	373.112			21.9154	60049		21.9154	6223.43		21.9154	1175.21	249.695	-159.351	-471.614		21.9154	731.703	113.043	20.8141	-68.7063
21.9261	283		21.9261	225		21.9261	241		21.9285	380.912			21.9285	57299		21.9285	4090.1		21.9285	1151.21	260.195	-172.851	-414.614		21.9285	720.037	124.043	14.8141	-76.0396
21.9392	277		21.9392	266		21.9392	258		21.9416	382.712			21.9416	53799		21.9416	7556.76		21.9416	1190.21	248.195	-147.351	-471.614		21.9416	693.37	130.043	13.3141	-66.7063
21.9524	319		21.9524	265		21.9524	311		21.9548	382.112			21.9548	63049		21.9548	9290.1		21.9548	1226.21	255.695	-154.851	-453.614		21.9548	733.37	137.543	11.3141	-71.373
21.9655	310		21.9655	267		21.9655	306		21.9679	381.512			21.9679	56049		21.9679	5423.43		21.9679	1202.21	263.195	-175.851	-422.114		21.9679	690.037	138.543	10.8141	-69.373
21.9786	294		21.9786	224		21.9786	282		21.981	389.012			21.981	63299		21.981	3023.43		21.981	1211.21	260.195	-145.851	-452.114		21.981	715.037	131.043	26.3141	-57.7063
21.9917	248		21.9917	268		21.9917	290		21.9942	379.412			21.9942	51549		21.9942	5423.43		21.9942	1217.21	272.195	-126.351	-456.614		21.9942	696.703	143.043	31.3141	-73.7063
22.0049	272		22.0049	269		22.0049	262		22.0073	383.612			22.0073	54799		22.0073	6223.43		22.0073	1202.21	245.195	-127.851	-417.614		22.0073	711.703	119.543	5.31409	-66.373
22.018	231		22.018	286		22.018	285		22.0204	387.212			22.0204	54049		22.0204	8356.76		22.0204	1190.21	224.195	-127.851	-443.114		22.0204	718.37	120.043	1.81409	-60.0396
22.0311	269		22.0311	274		22.0311	295		22.0335	379.112			22.0335	60049		22.0335	8356.76		22.0335	1229.21	237.695	-88.8514	-447.614		22.0335	711.703	134.043	7.31409	-67.0396
22.0443	303		22.0443	276		22.0443	287		22.0467	381.512			22.0467	50549		22.0467	9956.76		22.0467	1199.21	285.695	-145.851	-441.614		22.0467	736.703	137.543	26.3141	-67.0396
22.0574	292		22.0574	261		22.0574	277		22.0598	372.812			22.0598	52549		22.0598	5156.76		22.0598	1199.21	245.195	-109.851	-474.614		22.0598	706.703	140.543	11.8141	-69.7063
22.0705	299		22.0705	304		22.0705	322		22.0729	376.412			22.0729	54299		22.0729	4090.1		22.0729	1223.21	282.695	-135.351	-443.114		22.0729	731.703	131.043	26.3141	-71.0396
22.0837	279		22.0837	264		22.0837	300		22.0861	378.812			22.0861	56299		22.0861	4623.43		22.0861	1214.21	236.195	-111.351	-477.614		22.0861	720.037	128.543	22.8141	-75.373
22.0968	322		22.0968	225		22.0968	302		22.0992	376.112			22.0992	57549		22.0992	12756.8		22.0992	1178.21	239.195	-126.351	-419.114		22.0992	708.37	122.043	22.8141	-65.373
22.1099	300		22.1099	281		22.1099	284		22.1123	372.812			22.1123	56799		22.1123	10356.8		22.1123	1193.21	249.695	-145.851	-464.114		22.1123	718.37	128.043	18.8141	-65.0396
22.123	273		22.123	263		22.123	259		22.1255	377.012			22.1255	57299		22.1255	3290.1		22.1255	1238.21	239.195	-103.851	-485.114		22.1255	698.37	124.043	22.8141	-73.7063
22.1362	282		22.1362	245		22.1362	287		22.1386	383.312			22.1386	59299		22.1386	9023.43		22.1386	1247.21	276.695	-108.351	-471.614		22.1386	728.37	116.543	23.8141	-65.373
22.1493	303		22.1493	280		22.1493	287		22.1517	382.112			22.1517	61049		22.1517	7023.43		22.1517	1181.21	222.695	-141.351	-450.614		22.1517	703.37	119.543	31.8141	-70.373
22.1624	275		22.1624	279		22.1624	297		22.1648	377.012			22.1648	57549		22.1648	7023.43		22.1648	1268.21	230.195	-115.851	-471.614		22.1648	715.037	120.043	18.3141	-64.0396
22.1756	245		22.1756	237		22.1756	297		22.178	382.712			22.178	53299		22.178	2223.43		22.178	1193.21	288.695	-129.351	-435.614		22.178	731.703	111.543	8.31409	-69.7063
22.1887	273		22.1887	268		22.1887	302		22.1911	384.812			22.1911	57799		22.1911	6890.1		22.1911	1199.21	281.195	-114.351	-429.614		22.1911	710.037	133.543	21.3141	-72.7063
22.2018	258		22.2018	246		22.2018	290		22.2042	388.712			22.2042	48049		22.2042	6090.1		22.2042	1157.21	224.195	-133.851	-497.114		22.2042	686.703	123.043	28.3141	-72.373
22.215	258		22.215	267		22.215	284		22.2174	382.412			22.2174	55299		22.2174	6623.43		22.2174	1193.21	275.195	-87.3514	-461.114		22.2174	711.703	134.043	24.3141	-67.0396
22.2281	305		22.2281	234		22.2281	275		22.2305	383.612			22.2305	60799		22.2305	7690.1		22.2305	1187.21	245.195	-105.351	-449.114		22.2305	696.703	137.543	10.8141	-71.7063
22.2412	258		22.2412	228		22.2412	302		22.2436	386.912			22.2436	53299		22.2436	11823.4		22.2436	1193.21	251.195	-127.851	-468.614		22.2436	696.703	137.543	20.3141	-70.373
22.2544	256		22.2544	274		22.2544	271		22.2568	389.312			22.2568	56049		22.2568	8623.43		22.2568	1199.21	273.695	-90.3514	-411.614		22.2568	741.703	113.043	27.8141	-65.7063
22.2675	289		22.2675	269		22.2675	267		22.2699	390.812			22.2699	57299		22.2699	8623.43		22.2699	1163.21	234.695	-126.351	-476.114		22.2699	706.703	136.543	8.81409	-69.373
22.2806	249		22.2806	241		22.2806	282		22.283	382.112			22.283	55799		22.283	9556.76		22.283	1178.21	239.195	-130.851	-446.114		22.283	721.703	123.043	20.3141	-65.0396
22.2937	280		22.2937	222		22.2937	304		22.2962	376.712			22.2962	52799		22.2962	7290.1		22.2962	1184.21	294.695	-112.851	-420.614		22.2962	698.37	133.043	21.3141	-61.373
22.3069	264		22.3069	263		22.3069	280		22.3093	389.312			22.3093	54799		22.3093	11690.1		22.3093	1217.21	255.695	-103.851	-467.114		22.3093	708.37	138.543	11.3141	-69.373
22.32	299		22.32	262		22.32	295		22.3224	387.512			22.3224	59299		22.3224	8356.76		22.3224	1184.21	293.195	-117.351	-413.114		22.3224	678.37	132.543	26.3141	-64.373
22.3331	286		22.3331	305		22.3331	282		22.3355	384.812			22.3355	59799		22.3355	5956.76		22.3355	1163.21	264.695	-88.8514	-440.114		22.3355	698.37	137.543	22.8141	-69.0396
22.3463	265		22.3463	292		22.3463	293		22.3487	385.412			22.3487	54299		22.3487	5156.76		22.3487	1196.21	239.195	-139.851	-464.114		22.3487	706.703	136.043	12.8141	-69.7063
22.3594	317		22.3594	238		22.3594	262		22.3618	379.412			22.3618	54799		22.3618	10223.4		22.3618	1202.21	251.195	-145.851	-435.614		22.3618	691.703	139.043	19.8141	-65.7063
22.3725	283		22.3725	241		22.3725	290		22.3749	377.612			22.3749	59549		22.3749	5690.1		22.3749	1154.21	249.695	-127.851	-446.114		22.3749	685.037	138.043	21.3141	-70.373
22.3857	272		22.3857	272		22.3857	300		22.3881	375.812			22.3881	53049		22.3881	11156.8		22.3881	1202.21	219.695	-103.851	-473.114		22.3881	725.037	123.043	12.3141	-59.7063
22.3988	270		22.3988	283		22.3988	316		22.4012	384.212			22.4012	58299		22.4012	7956.76		22.4012	1247.21	236.195	-115.851	-444.614		22.4012	680.037	116.543	26.8141	-69.373
22.4119	286		22.4119	281		22.4119	271		22.4143	383.312			22.4143	54299		22.4143	5156.76		22.4143	1202.21	228.695	-150.351	-485.114		22.4143	710.037	129.543	31.8141	-66.7063
22.425	293		22.425	273		22.425	302		22.4275	384.212			22.4275	61049		22.4275	9556.76		22.4275	1157.21	239.195	-126.351	-431.114		22.4275	713.37	139.043	28.8141	-65.7063
22.4382	293		22.4382	235		22.4382	236		22.4406	384.212			22.4406	56049		22.4406	6623.43		22.4406	1253.21	261.695	-162.351	-434.114		22.4406	730.037	135.543	14.8141	-71.373
22.4513	272		22.4513	302		22.4513	281		22.4537	383.912			22.4537	54549		22.4537	7823.43		22.4537	1187.21	261.695	-120.351	-461.114		22.4537	688.37	135.543	26.8141	-70.373
22.4644	296		22.4644	281		22.4644	279		22.4668	383.612			22.4668	56549		22.4668	11556.8		22.4668	1229.21	257.195	-94.8514	-429.614		22.4668	696.703	131.043	20.3141	-64.7063
22.4776	282		22.4776	249		22.4776	279		22.48	380.912			22.48	58049		22.48	8090.1		22.48	1229.21	248.195	-135.351	-411.614		22.48	721.703	145.043	12.8141	-68.7063
22.4907	269		22.4907	261		22.4907	316		22.4931	382.112			22.4931	57799		22.4931	10090.1		22.4931	1220.21	252.695	-106.851	-416.114		22.4931	740.037	153.543	19.3141	-67.0396
22.5038	300		22.5038	272		22.5038	269		22.5062	389.312			22.5062	57049		22.5062	3690.1		22.5062	1175.21	263.195	-120.351	-423.614		22.5062	706.703	138.043	25.8141	-76.0396
22.517	276		22.517	246		22.517	306		22.5194	386.612			22.5194	57549		22.5194	4623.43		22.5194	1211.21	224.195	-127.851	-414.614		22.5194	710.037	122.543	26.8141	-63.373
22.5301	316		22.5301	245		22.5301	273		22.5325	378.812			22.5325	56299		22.5325	8223.43		22.5325	1199.21	251.195	-138.351	-401.114		22.5325	696.703	138.043	28.3141	-68.0396
22.5432	311		22.5432	222		22.5432	256		22.5456	385.112			22.5456	53049		22.5456	8223.43		22.5456	1211.21	243.695	-123.351	-423.614		22.5456	696.703	133.043	25.8141	-66.0396
22.5563	272		22.5563	274		22.5563	307		22.5587	388.712			22.5587	51049		22.5587	9156.76		22.5587	1199.21	285.695	-117.351	-444.614		22.5587	731.703	121.043	32.8141	-66.0396
22.5695	274		22.5695	230		22.5695	295		22.5719	383.612			22.5719	59549		22.5719	11290.1		22.5719	1235.21	261.695	-148.851	-447.614		22.5719	711.703	148.043	29.3141	-63.0396
22.5826	297		22.5826	280		22.5826	304		22.585	377.912			22.585	56549		22.585	10490.1		22.585	1178.21	273.695	-130.851	-429.614		22.585	720.037	141.043	14.3141	-66.7063
22.5957	262		22.5957	263		22.5957	318		22.5981	384.812			22.5981	55799		22.5981	8756.76		22.5981	1214.21	252.695	-133.851	-414.614		22.5981	676.703	133.043	32.8141	-65.7063
22.6089	248		22.6089	269		22.6089	278		22.6113	385.112			22.6113	57299		22.6113	8756.76		22.6113	1241.21	281.195	-141.351	-446.114		22.6113	730.037	139.543	28.8141	-68.373
22.622	305		22.622	273		22.622	310		22.6244	387.512			22.6244	56549		22.6244	9823.43		22.6244	1163.21	261.695	-93.3514	-428.114		22.6244	715.037	122.543	15.3141	-62.373
22.6351	303		22.6351	286		22.6351	277		22.6375	385.712			22.6375	61049		22.6375	7556.76		22.6375	1202.21	264.695	-145.851	-447.614		22.6375	713.37	133.043	11.8141	-63.7063
22.6483	259		22.6483	275		22.6483	255		22.6507	384.812			22.6507	53049		22.6507	5823.43		22.6507	1214.21	233.195	-160.851	-465.614		22.6507	730.037	139.043	14.3141	-61.7063
22.6614	276		22.6614	261		22.6614	279		22.6638	387.512			22.6638	54799		22.6638	1823.43		22.6638	1217.21	219.695	-121.851	-474.614		22.6638	703.37	152.043	30.8141	-78.0396
22.6745	236		22.6745	274		22.6745	270		22.6769	382.112			22.6769	57549		22.6769	4756.76		22.6769	1199.21	255.695	-133.851	-407.114		22.6769	723.37	142.043	26.8141	-66.373
22.6877	305		22.6877	262		22.6877	309		22.6901	383.912			22.6901	57549		22.6901	9023.43		22.6901	1247.21	260.195	-103.851	-435.614		22.6901	698.37	137.543	41.8141	-65.373
22.7008	302		22.7008	283		22.7008	310		22.7032	383.612			22.7032	57049		22.7032	6223.43		22.7032	1175.21	245.195	-145.851	-441.614		22.7032	718.37	141.043	25.3141	-73.373
22.7139	271		22.7139	305		22.7139	289		22.7163	383.912			22.7163	58299		22.7163	11023.4		22.7163	1205.21	254.195	-135.351	-458.114		22.7163	701.703	130.043	25.8141	-63.7063
22.727	260		22.727	270		22.727	292		22.7294	390.212			22.7294	59549		22.7294	6756.76		22.7294	1196.21	236.195	-153.351	-422.114		22.7294	733.37	131.043	18.3141	-64.373
22.7402	293		22.7402	268		22.7402	279		22.7426	392.012			22.7426	53049		22.7426	5023.43		22.7426	1184.21	281.195	-159.351	-464.114		22.7426	735.037	150.543	13.8141	-66.373
22.7533	296		22.7533	243		22.7533	276		22.7557	388.412			22.7557	59799		22.7557	5556.76		22.7557	1202.21	252.695	-168.351	-455.114		22.7557	713.37	131.543	29.8141	-66.373
22.7664	284		22.7664	272		22.7664	275		22.7688	378.512			22.7688	60549		22.7688	9690.1		22.7688	1163.21	276.695	-106.851	-420.614		22.7688	746.703	146.043	24.8141	-69.373
22.7796	287		22.7796	261		22.7796	287		22.782	387.212			22.782	52549		22.782	9023.43		22.782	1190.21	260.195	-148.851	-432.614		22.782	698.37	150.543	25.3141	-67.373
22.7927	242		22.7927	243		22.7927	301		22.7951	383.012			22.7951	56299		22.7951	6490.1		22.7951	1265.21	264.695	-136.851	-434.114		22.7951	710.037	120.543	22.8141	-76.0396
22.8058	265		22.8058	270		22.8058	276		22.8082	388.712			22.8082	55049		22.8082	10356.8		22.8082	1217.21	257.195	-121.851	-419.114		22.8082	715.037	144.043	11.3141	-65.0396
22.819	290		22.819	225		22.819	292		22.8214	390.212			22.8214	55799		22.8214	7956.76		22.8214	1172.21	257.195	-124.851	-393.614		22.8214	685.037	137.543	22.3141	-69.7063
22.8321	288		22.8321	262		22.8321	285		22.8345	386.312			22.8345	57299		22.8345	7556.76		22.8345	1190.21	266.195	-136.851	-440.114		22.8345	700.037	141.043	22.8141	-67.373
22.8452	308		22.8452	266		22.8452	287		22.8476	388.712			22.8476	58549		22.8476	9956.76		22.8476	1211.21	264.695	-112.851	-417.614		22.8476	693.37	124.543	8.31409	-62.0396
22.8584	289		22.8584	232		22.8584	269		22.8607	386.312			22.8607	54549		22.8607	9290.1		22.8607	1172.21	285.695	-139.851	-417.614		22.8607	708.37	146.043	36.8141	-72.373
22.8715	299		22.8715	282		22.8715	286		22.8739	384.812			22.8739	55799		22.8739	8623.43		22.8739	1235.21	261.695	-118.851	-452.114		22.8739	701.703	144.043	32.3141	-60.7063
22.8846	277		22.8846	261		22.8846	261		22.887	381.512			22.887	59549		22.887	7156.76		22.887	1184.21	248.195	-108.351	-435.614		22.887	710.037	155.043	14.3141	-63.7063
22.8977	284		22.8977	277		22.8977	292		22.9001	384.812			22.9001	55799		22.9001	13556.8		22.9001	1163.21	287.195	-79.8514	-456.614		22.9001	728.37	133.543	28.3141	-71.373
22.9109	247		22.9109	281		22.9109	289		22.9133	383.912			22.9133	56549		22.9133	9023.43		22.9133	1187.21	242.195	-67.8514	-410.114		22.9133	695.037	135.543	35.3141	-63.0396
22.924	256		22.924	265		22.924	289		22.9264	379.712			22.9264	55799		22.9264	6890.1		22.9264	1175.21	294.695	-114.351	-435.614		22.9264	713.37	138.543	12.3141	-67.373
22.9371	288		22.9371	287		22.9371	271		22.9395	381.512			22.9395	57799		22.9395	5823.43		22.9395	1214.21	282.695	-129.351	-422.114		22.9395	686.703	139.043	13.8141	-63.0396
22.9503	277		22.9503	205		22.9503	302		22.9527	383.012			22.9527	57299		22.9527	7423.43		22.9527	1199.21	290.195	-118.851	-473.114		22.9527	688.37	131.043	22.3141	-71.0396
22.9634	280		22.9634	287		22.9634	292		22.9658	383.012			22.9658	50799		22.9658	12623.4		22.9658	1208.21	252.695	-148.851	-440.114		22.9658	715.037	134.043	35.8141	-71.0396
22.9765	269		22.9765	277		22.9765	265		22.9789	377.912			22.9789	55549		22.9789	10756.8		22.9789	1169.21	249.695	-148.851	-422.114		22.9789	720.037	151.043	31.3141	-63.7063
22.9897	300		22.9897	263		22.9897	277		22.992	381.212			22.992	54299		22.992	12223.4		22.992	1178.21	270.695	-153.351	-429.614		22.992	705.037	129.543	41.3141	-65.7063
23.0028	270		23.0028	269		23.0028	283		23.0052	388.712			23.0052	54549		23.0052	10756.8		23.0052	1199.21	276.695	-112.851	-441.614		23.0052	720.037	151.043	23.8141	-65.0396
23.0159	255		23.0159	256		23.0159	257		23.0183	384.812			23.0183	58799		23.0183	8090.1		23.0183	1229.21	267.695	-129.351	-438.614		23.0183	708.37	152.043	19.3141	-62.373
23.029	283		23.029	244		23.029	235		23.0314	382.112			23.0314	52799		23.0314	5956.76		23.0314	1205.21	248.195	-159.351	-441.614		23.0314	711.703	141.043	35.3141	-60.7063
23.0422	258		23.0422	262		23.0422	230		23.0446	388.112			23.0446	58049		23.0446	10490.1		23.0446	1175.21	258.695	-139.851	-470.114		23.0446	698.37	143.043	33.8141	-67.373
23.0553	288		23.0553	316		23.0553	261		23.0577	380.012			23.0577	58049		23.0577	5690.1		23.0577	1253.21	273.695	-91.8514	-428.114		23.0577	685.037	148.043	31.8141	-68.7063
23.0684	283		23.0684	263		23.0684	261		23.0708	384.812			23.0708	50299		23.0708	12223.4		23.0708	1193.21	275.195	-93.3514	-417.614		23.0708	718.37	146.543	34.3141	-69.373
23.0816	268		23.0816	269		23.0816	287		23.084	383.612			23.084	56549		23.084	15290.1		23.084	1223.21	291.695	-126.351	-414.614		23.084	690.037	135.043	42.3141	-70.0396
23.0947	272		23.0947	294		23.0947	274		23.0971	379.112			23.0971	54299		23.0971	10490.1		23.0971	1193.21	249.695	-121.851	-449.114		23.0971	715.037	130.043	26.8141	-64.0396
23.1078	293		23.1078	248		23.1078	292		23.1102	385.112			23.1102	55299		23.1102	7823.43		23.1102	1232.21	287.195	-135.351	-420.614		23.1102	685.037	143.543	11.8141	-61.7063
23.121	258		23.121	266		23.121	296		23.1234	386.012			23.1234	55049		23.1234	6890.1		23.1234	1181.21	246.695	-103.851	-431.114		23.1234	728.37	133.543	24.3141	-65.373
23.1341	299		23.1341	270		23.1341	278		23.1365	379.712			23.1365	54299		23.1365	8756.76		23.1365	1175.21	281.195	-115.851	-411.614		23.1365	731.703	144.043	26.8141	-71.7063
23.1472	297		23.1472	258		23.1472	249		23.1496	382.712			23.1496	54549		23.1496	10756.8		23.1496	1169.21	287.195	-187.851	-432.614		23.1496	696.703	136.543	41.8141	-69.373
23.1604	270		23.1604	228		23.1604	271		23.1627	386.912			23.1627	52799		23.1627	9023.43		23.1627	1184.21	254.195	-115.851	-392.114		23.1627	705.037	154.043	28.8141	-68.7063
23.1735	290		23.1735	258		23.1735	268		23.1759	387.812			23.1759	56549		23.1759	3023.43		23.1759	1196.21	281.195	-138.351	-440.114		23.1759	711.703	133.043	27.3141	-73.0396
23.1866	278		23.1866	279		23.1866	312		23.189	384.212			23.189	57299		23.189	14090.1		23.189	1154.21	242.195	-64.8514	-428.114		23.189	715.037	133.543	41.8141	-69.373
23.1997	276		23.1997	276		23.1997	287		23.2021	379.412			23.2021	56299		23.2021	8890.1		23.2021	1142.21	242.195	-121.851	-419.114		23.2021	695.037	144.043	45.8141	-66.373
23.2129	265		23.2129	304		23.2129	286		23.2153	382.112			23.2153	60799		23.2153	9690.1		23.2153	1169.21	290.195	-106.851	-417.614		23.2153	701.703	140.543	14.8141	-65.7063
23.226	278		23.226	264		23.226	259		23.2284	380.312			23.2284	55299		23.2284	7556.76		23.2284	1232.21	240.695	-105.351	-428.114		23.2284	696.703	129.543	33.3141	-61.373
23.2391	273		23.2391	233		23.2391	264		23.2415	380.012			23.2415	56049		23.2415	8356.76		23.2415	1163.21	294.695	-129.351	-437.114		23.2415	706.703	143.543	26.8141	-67.0396
23.2523	308		23.2523	240		23.2523	259		23.2547	386.012			23.2547	55799		23.2547	5956.76		23.2547	1154.21	278.195	-127.851	-404.114		23.2547	688.37	140.043	21.3141	-68.0396
23.2654	267		23.2654	235		23.2654	302		23.2678	379.412			23.2678	54549		23.2678	10623.4		23.2678	1202.21	293.195	-109.851	-435.614		23.2678	715.037	140.043	22.3141	-70.7063
23.2785	241		23.2785	259		23.2785	290		23.2809	384.812			23.2809	58549		23.2809	7956.76		23.2809	1190.21	279.695	-112.851	-416.114		23.2809	705.037	154.543	33.3141	-62.373
23.2917	280		23.2917	260		23.2917	255		23.294	388.112			23.294	53049		23.294	6890.1		23.294	1145.21	272.195	-106.851	-449.114		23.294	703.37	143.543	35.8141	-65.7063
23.3048	214		23.3048	242		23.3048	258		23.3072	382.112			23.3072	55299		23.3072	13023.4		23.3072	1190.21	254.195	-94.8514	-425.114		23.3072	680.037	156.043	36.3141	-72.0396
23.3179	273		23.3179	226		23.3179	275		23.3203	386.612			23.3203	55799		23.3203	14223.4		23.3203	1178.21	329.195	-126.351	-461.114		23.3203	708.37	141.543	39.3141	-65.0396
23.331	279		23.331	277		23.331	289		23.3334	386.612			23.3334	57549		23.3334	11023.4		23.3334	1211.21	296.195	-84.3514	-405.614		23.3334	696.703	127.043	38.3141	-56.373
23.3442	272		23.3442	255		23.3442	226		23.3466	386.312			23.3466	51299		23.3466	5690.1		23.3466	1289.21	260.195	-94.8514	-435.614		23.3466	701.703	142.043	18.3141	-60.0396
23.3573	280		23.3573	264		23.3573	275		23.3597	380.912			23.3597	58799		23.3597	8890.1		23.3597	1178.21	279.695	-142.851	-429.614		23.3597	698.37	137.543	32.3141	-70.7063
23.3704	300		23.3704	237		23.3704	265		23.3728	390.512			23.3728	60299		23.3728	7023.43		23.3728	1142.21	269.195	-109.851	-444.614		23.3728	706.703	121.043	42.3141	-68.0396
23.3836	291		23.3836	242		23.3836	269		23.386	377.912			23.386	58799		23.386	9156.76		23.386	1211.21	269.195	-133.851	-446.114		23.386	676.703	137.543	22.3141	-65.373
23.3967	271		23.3967	264		23.3967	245		23.3991	382.112			23.3991	54799		23.3991	11290.1		23.3991	1193.21	305.195	-105.351	-413.114		23.3991	720.037	145.543	24.3141	-59.7063
23.4098	297		23.4098	256		23.4098	255		23.4122	377.912			23.4122	57299		23.4122	11690.1		23.4122	1184.21	294.695	-141.351	-425.114		23.4122	711.703	149.043	36.3141	-63.0396
23.423	264		23.423	222		23.423	249		23.4254	375.212			23.4254	48049		23.4254	12356.8		23.4254	1166.21	275.195	-87.3514	-414.614		23.4254	703.37	142.543	34.8141	-64.0396
23.4361	259		23.4361	257		23.4361	264		23.4385	379.412			23.4385	53549		23.4385	13023.4		23.4385	1202.21	285.695	-177.351	-444.614		23.4385	713.37	138.543	38.3141	-62.7063
23.4492	262		23.4492	228		23.4492	272		23.4516	382.112			23.4516	60799		23.4516	7290.1		23.4516	1166.21	278.195	-123.351	-399.614		23.4516	718.37	147.043	24.3141	-60.0396
23.4623	235		23.4623	269		23.4623	281		23.4647	383.012			23.4647	50549		23.4647	9823.43		23.4647	1166.21	279.695	-111.351	-404.114		23.4647	696.703	153.543	33.3141	-65.7063
23.4755	248		23.4755	271		23.4755	243		23.4779	376.712			23.4779	52799		23.4779	10223.4		23.4779	1169.21	263.195	-109.851	-447.614		23.4779	740.037	136.043	25.8141	-63.373
23.4886	224		23.4886	266		23.4886	269		23.491	384.812			23.491	52049		23.491	10356.8		23.491	1199.21	311.195	-88.8514	-444.614		23.491	706.703	144.043	48.3141	-67.373
23.5017	235		23.5017	228		23.5017	257		23.5041	387.212			23.5041	58799		23.5041	6890.1		23.5041	1202.21	251.195	-121.851	-414.614		23.5041	716.703	144.543	27.8141	-66.373
23.5149	248		23.5149	260		23.5149	272		23.5173	375.812			23.5173	57299		23.5173	9156.76		23.5173	1193.21	309.695	-133.851	-431.114		23.5173	725.037	146.543	24.3141	-68.373
23.528	276		23.528	261		23.528	260		23.5304	386.612			23.5304	55799		23.5304	11423.4		23.5304	1202.21	285.695	-150.351	-449.114		23.5304	701.703	142.543	14.3141	-60.0396
23.5411	278		23.5411	203		23.5411	295		23.5435	386.012			23.5435	54549		23.5435	7690.1		23.5435	1205.21	288.695	-94.8514	-420.614		23.5435	708.37	135.043	25.3141	-70.0396
23.5542	256		23.5542	226		23.5542	270		23.5567	379.412			23.5567	53049		23.5567	17023.4		23.5567	1187.21	290.195	-114.351	-425.114		23.5567	700.037	151.543	47.8141	-66.7063
23.5674	266		23.5674	245		23.5674	284		23.5698	384.812			23.5698	49299		23.5698	10890.1		23.5698	1208.21	272.195	-91.8514	-456.614		23.5698	688.37	132.543	40.3141	-64.0396
23.5805	246		23.5805	263		23.5805	264		23.5829	383.912			23.5829	53049		23.5829	11956.8		23.5829	1199.21	309.695	-120.351	-417.614		23.5829	696.703	136.543	41.8141	-59.7063
23.5937	279		23.5937	237		23.5937	258		23.5961	377.012			23.5961	53549		23.5961	9556.76		23.5961	1163.21	287.195	-138.351	-441.614		23.5961	683.37	140.043	37.8141	-65.373
23.6068	284		23.6068	280		23.6068	301		23.6092	383.012			23.6092	53049		23.6092	11956.8		23.6092	1268.21	321.695	-130.851	-438.614		23.6092	698.37	123.543	31.3141	-59.7063
23.6199	243		23.6199	242		23.6199	271		23.6223	380.312			23.6223	58299		23.6223	5290.1		23.6223	1220.21	276.695	-81.3514	-437.114		23.6223	715.037	145.543	26.8141	-65.373
23.633	294		23.633	247		23.633	264		23.6354	380.012			23.6354	56049		23.6354	8890.1		23.6354	1205.21	258.695	-148.851	-429.614		23.6354	690.037	129.043	49.8141	-66.0396
23.6462	258		23.6462	213		23.6462	258		23.6486	382.112			23.6486	60299		23.6486	9956.76		23.6486	1175.21	297.695	-129.351	-450.614		23.6486	700.037	124.043	39.3141	-61.0396
23.6593	245		23.6593	267		23.6593	295		23.6617	383.312			23.6617	57299		23.6617	12756.8		23.6617	1175.21	239.195	-102.351	-360.614		23.6617	711.703	129.543	42.3141	-63.373
23.6724	283		23.6724	234		23.6724	259		23.6748	371.312			23.6748	58049		23.6748	7023.43		23.6748	1178.21	255.695	-142.851	-411.614		23.6748	710.037	135.543	23.3141	-58.373
23.6856	288		23.6856	261		23.6856	245		23.688	373.712			23.688	54049		23.688	12223.4		23.688	1196.21	293.195	-163.851	-402.614		23.688	708.37	123.543	31.3141	-65.0396
23.6987	258		23.6987	247		23.6987	278		23.7011	386.912			23.7011	52049		23.7011	7690.1		23.7011	1169.21	251.195	-139.851	-440.114		23.7011	686.703	138.543	37.8141	-65.7063
23.7118	258		23.7118	255		23.7118	266		23.7142	375.512			23.7142	54549		23.7142	11023.4		23.7142	1217.21	287.195	-165.351	-447.614		23.7142	688.37	154.043	32.8141	-65.0396
23.7249	237		23.7249	258		23.7249	270		23.7274	385.712			23.7274	48549		23.7274	5690.1		23.7274	1181.21	308.195	-156.351	-440.114		23.7274	705.037	132.543	34.8141	-65.373
23.7381	225		23.7381	238		23.7381	285		23.7405	383.012			23.7405	51299		23.7405	11290.1		23.7405	1172.21	293.195	-124.851	-450.614		23.7405	676.703	136.043	14.8141	-64.7063
23.7512	287		23.7512	246		23.7512	266		23.7536	381.812			23.7536	56299		23.7536	6756.76		23.7536	1181.21	282.695	-186.351	-434.114		23.7536	708.37	134.043	13.8141	-63.0396
23.7643	231		23.7643	222		23.7643	240		23.7667	375.812			23.7667	55549		23.7667	5423.43		23.7667	1187.21	260.195	-91.8514	-416.114		23.7667	703.37	144.543	26.8141	-59.373
23.7775	288		23.7775	235		23.7775	267		23.7799	380.612			23.7799	55299		23.7799	8623.43		23.7799	1169.21	278.195	-130.851	-411.614		23.7799	686.703	155.043	22.8141	-67.373
23.7906	277		23.7906	231		23.7906	278		23.793	382.712			23.793	54799		23.793	5823.43		23.793	1160.21	293.195	-135.351	-458.114		23.793	695.037	123.043	34.8141	-63.7063
23.8037	233		23.8037	222		23.8037	245		23.8061	379.712			23.8061	51299		23.8061	14223.4		23.8061	1241.21	285.695	-106.851	-416.114		23.8061	691.703	141.543	22.8141	-72.0396
23.8169	249		23.8169	263		23.8169	256		23.8193	377.912			23.8193	55049		23.8193	12090.1		23.8193	1175.21	285.695	-133.851	-417.614		23.8193	723.37	127.043	18.8141	-69.0396
23.83	274		23.83	243		23.83	274		23.8324	380.912			23.8324	56549		23.8324	8490.1		23.8324	1115.21	326.195	-163.851	-425.114		23.8324	706.703	140.543	27.8141	-65.373
23.8431	277		23.8431	282		23.8431	233		23.8455	380.612			23.8455	56799		23.8455	9690.1		23.8455	1184.21	287.195	-109.851	-432.614		23.8455	676.703	144.543	12.3141	-66.7063
23.8562	244		23.8562	262		23.8562	275		23.8587	380.012			23.8587	46049		23.8587	13023.4		23.8587	1202.21	303.695	-117.351	-431.114		23.8587	701.703	144.543	22.8141	-63.7063
23.8694	281		23.8694	265		23.8694	258		23.8718	379.412			23.8718	54299		23.8718	9156.76		23.8718	1181.21	285.695	-151.851	-440.114		23.8718	716.703	142.043	37.8141	-67.7063
23.8825	260		23.8825	232		23.8825	237		23.8849	377.612			23.8849	52049		23.8849	12890.1		23.8849	1172.21	276.695	-127.851	-461.114		23.8849	673.37	137.043	22.3141	-71.7063
23.8956	271		23.8956	259		23.8956	266		23.898	380.012			23.898	48799		23.898	9556.76		23.898	1178.21	272.195	-157.851	-407.114		23.898	723.37	134.043	15.8141	-68.7063
23.9088	289		23.9088	242		23.9088	284		23.9112	382.112			23.9112	55799		23.9112	10356.8		23.9112	1169.21	285.695	-153.351	-429.614		23.9112	753.37	135.043	3.81409	-63.373
23.9219	270		23.9219	265		23.9219	268		23.9243	390.512			23.9243	46549		23.9243	8623.43		23.9243	1181.21	266.195	-123.351	-435.614		23.9243	683.37	144.043	48.8141	-68.373
23.935	257		23.935	256		23.935	228		23.9374	378.512			23.9374	53799		23.9374	3156.76		23.9374	1163.21	258.695	-141.351	-434.114		23.9374	713.37	136.043	24.3141	-69.373
23.9482	236		23.9482	234		23.9482	267		23.9506	373.112			23.9506	51049		23.9506	5823.43		23.9506	1202.21	278.195	-108.351	-449.114		23.9506	698.37	136.043	12.3141	-63.373
23.9613	226		23.9613	261		23.9613	276		23.9637	381.812			23.9637	57049		23.9637	5823.43		23.9637	1202.21	285.695	-124.851	-440.114		23.9637	700.037	123.043	31.3141	-69.7063
23.9744	236		23.9744	230		23.9744	269		23.9768	379.112			23.9768	52799		23.9768	2756.76		23.9768	1211.21	257.195	-126.351	-429.614		23.9768	681.703	134.043	13.8141	-77.7063
23.9875	262		23.9875	225		23.9875	241		23.99	381.212			23.99	51049		23.99	4356.76		23.99	1190.21	281.195	-141.351	-402.614		23.99	703.37	120.543	23.3141	-68.7063
24.0007	288		24.0007	220		24.0007	276		24.0031	386.012			24.0031	53299		24.0031	5556.76		24.0031	1169.21	285.695	-177.351	-455.114		24.0031	700.037	134.543	26.8141	-67.373
24.0138	294		24.0138	243		24.0138	275		24.0162	381.812			24.0162	51549		24.0162	4090.1		24.0162	1154.21	252.695	-142.851	-398.114		24.0162	703.37	129.043	21.3141	-63.7063
24.0269	249		24.0269	255		24.0269	258		24.0293	378.212			24.0293	58049		24.0293	11023.4		24.0293	1193.21	269.195	-138.351	-407.114		24.0293	666.703	133.543	14.8141	-76.0396
24.0401	243		24.0401	242		24.0401	271		24.0425	384.212			24.0425	49799		24.0425	7290.1		24.0425	1172.21	287.195	-124.851	-435.614		24.0425	691.703	123.543	24.8141	-68.0396
24.0532	246		24.0532	258		24.0532	293		24.0556	380.612			24.0556	57049		24.0556	3423.43		24.0556	1208.21	284.195	-178.851	-482.114		24.0556	691.703	140.043	20.3141	-65.373
24.0663	275		24.0663	247		24.0663	283		24.0687	380.312			24.0687	55049		24.0687	6490.1		24.0687	1172.21	279.695	-147.351	-431.114		24.0687	713.37	134.043	19.8141	-67.7063
24.0795	256		24.0795	272		24.0795	272		24.0819	380.312			24.0819	50299		24.0819	10356.8		24.0819	1151.21	270.695	-142.851	-428.114		24.0819	715.037	122.043	19.3141	-65.7063
24.0926	260		24.0926	259		24.0926	280		24.095	377.312			24.095	48549		24.095	9290.1		24.095	1163.21	228.695	-151.851	-456.614		24.095	700.037	143.043	13.3141	-63.0396
24.1057	262		24.1057	246		24.1057	290		24.1081	380.312			24.1081	51299		24.1081	-176.57		24.1081	1178.21	261.695	-124.851	-432.614		24.1081	696.703	143.543	22.8141	-60.7063
24.1189	243		24.1189	233		24.1189	299		24.1213	374.912			24.1213	54799		24.1213	5823.43		24.1213	1178.21	302.195	-151.851	-476.114		24.1213	703.37	117.043	15.3141	-64.0396
24.132	261		24.132	248		24.132	288		24.1344	371.312			24.1344	53299		24.1344	7423.43		24.1344	1214.21	291.695	-135.351	-416.114		24.1344	676.703	139.543	32.3141	-64.0396
24.1451	246		24.1451	230		24.1451	285		24.1475	378.812			24.1475	54299		24.1475	10090.1		24.1475	1163.21	246.695	-106.851	-443.114		24.1475	681.703	122.043	6.31409	-66.7063
24.1582	242		24.1582	256		24.1582	269		24.1607	379.712			24.1607	53049		24.1607	3156.76		24.1607	1199.21	260.195	-126.351	-395.114		24.1607	728.37	137.543	8.81409	-65.7063
24.1714	249		24.1714	274		24.1714	300		24.1738	380.312			24.1738	55799		24.1738	7290.1		24.1738	1148.21	284.195	-147.351	-446.114		24.1738	701.703	127.543	13.8141	-74.7063
24.1845	234		24.1845	259		24.1845	270		24.1869	382.712			24.1869	52549		24.1869	7023.43		24.1869	1193.21	254.195	-115.851	-446.114		24.1869	691.703	130.043	27.3141	-70.373
24.1976	225		24.1976	221		24.1976	259		24.2	382.412			24.2	55299		24.2	10623.4		24.2	1193.21	245.195	-150.351	-444.614		24.2	676.703	140.543	13.8141	-66.0396
24.2108	275		24.2108	217		24.2108	246		24.2132	379.412			24.2132	55549		24.2132	8090.1		24.2132	1184.21	260.195	-156.351	-461.114		24.2132	680.037	139.543	12.8141	-70.373
24.2239	268		24.2239	235		24.2239	239		24.2263	380.912			24.2263	55799		24.2263	2090.1		24.2263	1232.21	282.695	-133.851	-453.614		24.2263	701.703	130.043	26.3141	-69.373
24.237	279		24.237	233		24.237	233		24.2394	381.512			24.2394	57549		24.2394	7556.76		24.2394	1169.21	279.695	-120.351	-450.614		24.2394	693.37	120.043	8.81409	-71.7063
24.2502	256		24.2502	228		24.2502	271		24.2526	376.112			24.2526	57049		24.2526	3290.1		24.2526	1157.21	261.695	-129.351	-405.614		24.2526	671.703	138.543	25.3141	-74.7063
24.2633	238		24.2633	232		24.2633	247		24.2657	376.112			24.2657	56049		24.2657	5556.76		24.2657	1202.21	261.695	-124.851	-447.614		24.2657	691.703	132.543	33.3141	-66.373
24.2764	261		24.2764	244		24.2764	274		24.2788	382.712			24.2788	54049		24.2788	9956.76		24.2788	1232.21	245.195	-144.351	-419.114		24.2788	688.37	137.543	22.8141	-72.0396
24.2895	244		24.2895	242		24.2895	232		24.2919	379.412			24.2919	52549		24.2919	8756.76		24.2919	1193.21	264.695	-133.851	-473.114		24.2919	718.37	102.543	10.3141	-68.373
24.3027	249		24.3027	228		24.3027	270		24.3051	379.112			24.3051	54549		24.3051	5023.43		24.3051	1130.21	293.195	-160.851	-435.614		24.3051	675.037	142.543	27.8141	-68.7063
24.3158	281		24.3158	228		24.3158	272		24.3182	383.912			24.3182	58549		24.3182	4623.43		24.3182	1208.21	255.695	-106.851	-422.114		24.3182	678.37	137.043	8.81409	-67.7063
24.3289	270		24.3289	234		24.3289	230		24.3313	377.612			24.3313	53299		24.3313	7956.76		24.3313	1160.21	218.195	-118.851	-443.114		24.3313	688.37	127.043	21.3141	-63.7063
24.3421	235		24.3421	215		24.3421	266		24.3445	377.612			24.3445	51549		24.3445	5823.43		24.3445	1193.21	260.195	-141.351	-440.114		24.3445	726.703	127.543	11.3141	-67.373
24.3552	257		24.3552	235		24.3552	277		24.3576	387.812			24.3576	49549		24.3576	8623.43		24.3576	1184.21	212.195	-153.351	-444.614		24.3576	681.703	150.543	21.8141	-62.0396
24.3683	231		24.3683	242		24.3683	276		24.3707	379.412			24.3707	57549		24.3707	-309.904		24.3707	1169.21	269.195	-148.851	-464.114		24.3707	683.37	146.543	22.8141	-63.373
24.3815	258		24.3815	234		24.3815	246		24.3839	373.112			24.3839	49049		24.3839	4490.1		24.3839	1202.21	236.195	-147.351	-459.614		24.3839	696.703	138.043	29.8141	-71.373
24.3946	230		24.3946	258		24.3946	284		24.397	379.112			24.397	47799		24.397	2090.1		24.397	1163.21	272.195	-151.851	-441.614		24.397	696.703	145.043	12.8141	-68.7063
24.4077	263		24.4077	226		24.4077	291		24.4101	385.112			24.4101	56049		24.4101	8090.1		24.4101	1190.21	245.195	-136.851	-461.114		24.4101	703.37	141.543	19.3141	-63.373
24.4209	242		24.4209	258		24.4209	233		24.4232	372.812			24.4232	52549		24.4232	4890.1		24.4232	1154.21	270.695	-126.351	-426.614		24.4232	713.37	120.543	10.8141	-72.0396
24.434	248		24.434	245		24.434	229		24.4364	378.512			24.4364	53549		24.4364	223.43		24.4364	1169.21	288.695	-165.351	-428.114		24.4364	706.703	119.543	15.3141	-65.0396
24.4471	239		24.4471	249		24.4471	243		24.4495	378.812			24.4495	51799		24.4495	8623.43		24.4495	1166.21	272.195	-159.351	-462.614		24.4495	701.703	109.043	20.8141	-66.373
24.4602	263		24.4602	232		24.4602	260		24.4626	384.812			24.4626	52799		24.4626	5556.76		24.4626	1130.21	239.195	-114.351	-410.114		24.4626	695.037	120.543	2.81409	-62.373
24.4734	233		24.4734	241		24.4734	242		24.4758	383.012			24.4758	51299		24.4758	7423.43		24.4758	1178.21	276.695	-115.851	-464.114		24.4758	680.037	118.543	18.8141	-64.7063
24.4865	255		24.4865	220		24.4865	262		24.4889	379.712			24.4889	51049		24.4889	6756.76		24.4889	1172.21	255.695	-138.351	-452.114		24.4889	685.037	128.543	9.31409	-72.7063
24.4996	280		24.4996	227		24.4996	273		24.502	392.612			24.502	56549		24.502	2223.43		24.502	1130.21	264.695	-142.851	-441.614		24.502	716.703	136.543	4.31409	-67.373
24.5128	231		24.5128	247		24.5128	244		24.5152	383.612			24.5152	51549		24.5152	3423.43		24.5152	1148.21	257.195	-172.851	-440.114		24.5152	691.703	141.043	29.8141	-71.7063
24.5259	265		24.5259	289		24.5259	246		24.5283	384.512			24.5283	52299		24.5283	1823.43		24.5283	1142.21	249.695	-109.851	-449.114		24.5283	715.037	112.543	28.8141	-72.0396
24.539	278		24.539	246		24.539	221		24.5414	384.212			24.5414	52299		24.5414	3956.76		24.5414	1193.21	266.195	-130.851	-437.114		24.5414	681.703	129.543	23.8141	-73.373
24.5522	256		24.5522	234		24.5522	258		24.5546	383.912			24.5546	49299		24.5546	6223.43		24.5546	1190.21	242.195	-156.351	-455.114		24.5546	693.37	132.043	29.3141	-67.7063
24.5653	270		24.5653	223		24.5653	263		24.5677	381.212			24.5677	50549		24.5677	7956.76		24.5677	1211.21	251.195	-133.851	-443.114		24.5677	683.37	138.543	9.31409	-70.7063
24.5784	272		24.5784	212		24.5784	264		24.5808	375.812			24.5808	52549		24.5808	10223.4		24.5808	1190.21	218.195	-160.851	-471.614		24.5808	696.703	124.043	19.8141	-63.373
24.5916	260		24.5916	246		24.5916	273		24.5939	384.812			24.5939	49799		24.5939	6490.1		24.5939	1199.21	216.695	-156.351	-426.614		24.5939	688.37	135.543	9.81409	-71.7063
24.6047	261		24.6047	262		24.6047	218		24.6071	382.112			24.6071	51549		24.6071	3156.76		24.6071	1181.21	209.195	-157.851	-435.614		24.6071	691.703	137.043	5.81409	-69.0396
24.6178	258		24.6178	232		24.6178	277		24.6202	382.712			24.6202	52549		24.6202	4356.76		24.6202	1175.21	249.695	-136.851	-471.614		24.6202	690.037	137.043	18.3141	-78.7063
24.6309	272		24.6309	237		24.6309	246		24.6333	385.412			24.6333	51799		24.6333	7823.43		24.6333	1175.21	239.195	-132.351	-422.114		24.6333	716.703	118.043	-0.68591	-71.7063
24.6441	233		24.6441	216		24.6441	257		24.6465	384.212			24.6465	48299		24.6465	7156.76		24.6465	1166.21	249.695	-133.851	-452.114		24.6465	663.37	128.043	7.81409	-65.7063
24.6572	209		24.6572	247		24.6572	245		24.6596	379.112			24.6596	56049		24.6596	1156.76		24.6596	1196.21	212.195	-165.351	-447.614		24.6596	678.37	113.543	6.31409	-64.373
24.6703	273		24.6703	278		24.6703	276		24.6727	381.812			24.6727	50799		24.6727	6356.76		24.6727	1229.21	231.695	-157.851	-506.114		24.6727	685.037	133.043	7.81409	-64.373
24.6835	243		24.6835	229		24.6835	278		24.6859	378.812			24.6859	54049		24.6859	7823.43		24.6859	1181.21	210.695	-133.851	-477.614		24.6859	713.37	123.043	23.8141	-70.7063
24.6966	243		24.6966	220		24.6966	284		24.699	377.012			24.699	54549		24.699	4756.76		24.699	1103.21	209.195	-199.851	-467.114		24.699	705.037	130.543	33.8141	-71.373
24.7097	265		24.7097	272		24.7097	258		24.7121	374.612			24.7121	50799		24.7121	2090.1		24.7121	1127.21	233.195	-172.851	-434.114		24.7121	668.37	122.043	18.8141	-72.373
24.7229	287		24.7229	233		24.7229	271		24.7252	380.312			24.7252	58549		24.7252	7956.76		24.7252	1178.21	263.195	-144.351	-416.114		24.7252	683.37	130.543	20.3141	-77.0396
24.736	266		24.736	215		24.736	276		24.7384	377.312			24.7384	56049		24.7384	5290.1		24.7384	1190.21	236.195	-145.851	-419.114		24.7384	673.37	120.043	28.3141	-72.373
24.7491	270		24.7491	237		24.7491	256		24.7515	375.512			24.7515	52049		24.7515	5156.76		24.7515	1166.21	242.195	-115.851	-477.614		24.7515	696.703	132.043	19.8141	-67.373
24.7622	255		24.7622	260		24.7622	243		24.7646	378.512			24.7646	50049		24.7646	8090.1		24.7646	1172.21	242.195	-123.351	-455.114		24.7646	690.037	119.543	24.8141	-68.7063
24.7754	255		24.7754	244		24.7754	247		24.7778	377.612			24.7778	55299		24.7778	4890.1		24.7778	1196.21	206.195	-121.851	-470.114		24.7778	688.37	123.543	6.81409	-72.373
24.7885	227		24.7885	245		24.7885	229		24.7909	386.312			24.7909	55799		24.7909	2623.43		24.7909	1181.21	252.695	-183.351	-491.114		24.7909	688.37	131.043	10.8141	-69.373
24.8016	235		24.8016	264		24.8016	256		24.804	386.912			24.804	53549		24.804	6356.76		24.804	1136.21	225.695	-132.351	-422.114		24.804	680.037	139.543	10.3141	-64.0396
24.8148	272		24.8148	232		24.8148	259		24.8172	377.912			24.8172	49549		24.8172	5956.76		24.8172	1172.21	267.695	-144.351	-477.614		24.8172	673.37	116.543	5.31409	-56.0396
24.8279	271		24.8279	230		24.8279	257		24.8303	382.712			24.8303	53549		24.8303	5023.43		24.8303	1175.21	228.695	-157.851	-470.114		24.8303	675.037	132.043	6.81409	-66.373
24.841	259		24.841	238		24.841	242		24.8434	380.012			24.8434	51799		24.8434	3956.76		24.8434	1184.21	261.695	-153.351	-455.114		24.8434	686.703	123.543	18.3141	-76.0396
24.8542	256		24.8542	231		24.8542	247		24.8565	378.812			24.8565	52799		24.8565	8223.43		24.8565	1187.21	236.195	-157.851	-456.614		24.8565	701.703	133.043	2.81409	-69.373
24.8673	240		24.8673	213		24.8673	292		24.8697	388.112			24.8697	55799		24.8697	1556.76		24.8697	1172.21	222.695	-145.851	-476.114		24.8697	685.037	122.043	1.81409	-65.373
24.8804	237		24.8804	236		24.8804	246		24.8828	380.312			24.8828	52049		24.8828	3423.43		24.8828	1151.21	237.695	-133.851	-426.614		24.8828	690.037	115.043	21.8141	-64.0396
24.8935	245		24.8935	248		24.8935	279		24.8959	377.312			24.8959	52549		24.8959	3023.43		24.8959	1172.21	251.195	-151.851	-476.114		24.8959	681.703	117.543	6.81409	-76.0396
24.9067	241		24.9067	233		24.9067	237		24.9091	375.812			24.9091	49049		24.9091	3423.43		24.9091	1172.21	243.695	-184.851	-440.114		24.9091	683.37	122.543	13.3141	-69.7063
24.9198	292		24.9198	222		24.9198	256		24.9222	384.212			24.9222	50799		24.9222	1823.43		24.9222	1187.21	207.695	-139.851	-453.614		24.9222	705.037	138.043	14.8141	-70.7063
24.9329	229		24.9329	215		24.9329	230		24.9353	381.812			24.9353	53549		24.9353	4756.76		24.9353	1172.21	249.695	-120.351	-449.114		24.9353	693.37	139.043	5.31409	-74.0396
24.9461	217		24.9461	232		24.9461	271		24.9485	386.312			24.9485	50049		24.9485	1823.43		24.9485	1241.21	218.195	-192.351	-486.614		24.9485	678.37	119.043	0.31409	-69.373
24.9592	257		24.9592	233		24.9592	245		24.9616	382.712			24.9616	52549		24.9616	1556.76		24.9616	1199.21	251.195	-106.851	-422.114		24.9616	698.37	123.543	-3.18591	-75.7063
24.9723	247		24.9723	239		24.9723	268		24.9747	376.412			24.9747	52299		24.9747	-976.57		24.9747	1196.21	263.195	-150.351	-414.614		24.9747	703.37	122.043	-1.18591	-76.373
24.9855	266		24.9855	262		24.9855	239		24.9879	381.212			24.9879	53049		24.9879	6223.43		24.9879	1184.21	192.695	-160.851	-455.114		24.9879	680.037	106.543	3.31409	-72.373
24.9986	221		24.9986	232		24.9986	221		25.001	383.312			25.001	47549		25.001	5290.1		25.001	1160.21	240.695	-168.351	-423.614		25.001	711.703	119.543	5.31409	-74.373
25.0117	262		25.0117	273		25.0117	230		25.0141	386.312			25.0141	48549		25.0141	890.096		25.0141	1187.21	251.195	-121.851	-435.614		25.0141	676.703	116.043	11.3141	-72.373
25.0249	235		25.0249	234		25.0249	280		25.0272	380.012			25.0272	52299		25.0272	9690.1		25.0272	1214.21	245.195	-193.851	-470.114		25.0272	703.37	130.543	-1.18591	-76.7063
25.038	248		25.038	236		25.038	246		25.0404	376.112			25.0404	51549		25.0404	7690.1		25.0404	1205.21	210.695	-141.351	-437.114		25.0404	665.037	122.543	3.31409	-76.0396
25.0511	233		25.0511	275		25.0511	260		25.0535	383.912			25.0535	49299		25.0535	1956.76		25.0535	1190.21	252.695	-172.851	-449.114		25.0535	688.37	112.543	14.8141	-72.373
25.0642	269		25.0642	220		25.0642	255		25.0666	383.312			25.0666	50799		25.0666	223.43		25.0666	1196.21	234.695	-168.351	-423.614		25.0666	701.703	116.043	10.3141	-71.0396
25.0774	271		25.0774	260		25.0774	235		25.0798	375.212			25.0798	50299		25.0798	1556.76		25.0798	1235.21	231.695	-159.351	-479.114		25.0798	678.37	141.043	3.31409	-72.373
25.0905	240		25.0905	240		25.0905	232		25.0929	387.512			25.0929	48299		25.0929	5423.43		25.0929	1196.21	219.695	-112.851	-464.114		25.0929	680.037	115.043	2.81409	-70.0396
25.1036	249		25.1036	222		25.1036	255		25.106	374.612			25.106	51549		25.106	2490.1		25.106	1157.21	236.195	-141.351	-447.614		25.106	685.037	114.543	15.3141	-67.373
25.1168	246		25.1168	227		25.1168	237		25.1192	375.212			25.1192	50299		25.1192	4623.43		25.1192	1175.21	231.695	-145.851	-476.114		25.1192	688.37	129.543	6.31409	-73.373
25.1299	268		25.1299	216		25.1299	247		25.1323	380.012			25.1323	50799		25.1323	2356.76		25.1323	1127.21	261.695	-135.351	-476.114		25.1323	685.037	123.543	-3.18591	-69.373
25.143	272		25.143	240		25.143	248		25.1454	385.712			25.1454	45799		25.1454	6090.1		25.1454	1193.21	246.695	-151.851	-462.614		25.1454	688.37	113.043	14.8141	-70.373
25.1562	227		25.1562	201		25.1562	259		25.1586	383.012			25.1586	51299		25.1586	3690.1		25.1586	1199.21	228.695	-172.851	-470.114		25.1586	686.703	121.043	14.3141	-79.0396
25.1693	259		25.1693	228		25.1693	265		25.1717	382.412			25.1717	55549		25.1717	2223.43		25.1717	1214.21	248.195	-133.851	-446.114		25.1717	690.037	113.043	4.31409	-71.0396
25.1824	269		25.1824	246		25.1824	241		25.1848	386.612			25.1848	52049		25.1848	5556.76		25.1848	1190.21	227.195	-144.351	-485.114		25.1848	686.703	133.543	2.31409	-74.0396
25.1955	255		25.1955	234		25.1955	288		25.1979	379.112			25.1979	54299		25.1979	756.763		25.1979	1145.21	204.695	-160.851	-464.114		25.1979	713.37	118.043	2.81409	-76.0396
25.2087	245		25.2087	228		25.2087	244		25.2111	381.812			25.2111	54049		25.2111	2090.1		25.2111	1196.21	230.195	-133.851	-437.114		25.2111	693.37	112.543	7.81409	-80.7063
25.2218	291		25.2218	232		25.2218	239		25.2242	385.412			25.2242	50799		25.2242	6090.1		25.2242	1187.21	200.195	-162.351	-482.114		25.2242	690.037	119.543	19.3141	-73.7063
25.2349	281		25.2349	259		25.2349	244		25.2373	380.312			25.2373	50299		25.2373	6356.76		25.2373	1226.21	234.695	-130.851	-464.114		25.2373	700.037	123.043	8.31409	-72.0396
25.2481	278		25.2481	246		25.2481	266		25.2505	377.312			25.2505	56799		25.2505	2090.1		25.2505	1220.21	219.695	-129.351	-456.614		25.2505	690.037	134.043	-3.18591	-65.373
25.2612	240		25.2612	232		25.2612	243		25.2636	379.112			25.2636	45549		25.2636	3556.76		25.2636	1193.21	246.695	-177.351	-465.614		25.2636	700.037	129.543	6.31409	-69.373
25.2743	237		25.2743	242		25.2743	258		25.2767	381.212			25.2767	50299		25.2767	3823.43		25.2767	1226.21	246.695	-177.351	-464.114		25.2767	700.037	136.043	0.81409	-71.7063
25.2874	255		25.2874	258		25.2874	271		25.2899	387.212			25.2899	48049		25.2899	3023.43		25.2899	1229.21	236.195	-171.351	-398.114		25.2899	698.37	115.043	10.3141	-66.7063
25.3006	242		25.3006	247		25.3006	264		25.303	376.412			25.303	46299		25.303	223.43		25.303	1163.21	258.695	-142.851	-450.614		25.303	685.037	133.543	9.31409	-64.0396
25.3137	258		25.3137	220		25.3137	239		25.3161	378.212			25.3161	52549		25.3161	2356.76		25.3161	1271.21	260.195	-156.351	-471.614		25.3161	698.37	122.543	5.31409	-65.0396
25.3268	242		25.3268	223		25.3268	229		25.3292	383.012			25.3292	53049		25.3292	4356.76		25.3292	1202.21	240.695	-180.351	-461.114		25.3292	695.037	124.043	18.8141	-75.373
25.34	234		25.34	234		25.34	264		25.3424	374.012			25.3424	56799		25.3424	756.763		25.3424	1199.21	215.195	-181.851	-474.614		25.3424	675.037	118.543	9.31409	-68.373
25.3531	270		25.3531	256		25.3531	281		25.3555	380.612			25.3555	51799		25.3555	7423.43		25.3555	1187.21	234.695	-115.851	-459.614		25.3555	720.037	117.543	-2.68591	-66.7063
25.3662	238		25.3662	240		25.3662	241		25.3686	385.112			25.3686	51299		25.3686	1956.76		25.3686	1178.21	222.695	-147.351	-467.114		25.3686	691.703	123.043	15.3141	-72.373
25.3794	256		25.3794	239		25.3794	241		25.3818	386.012			25.3818	47549		25.3818	3556.76		25.3818	1184.21	258.695	-183.351	-498.614		25.3818	706.703	128.543	11.3141	-66.373
25.3925	213		25.3925	229		25.3925	225		25.3949	386.912			25.3949	49049		25.3949	1023.43		25.3949	1190.21	251.195	-163.851	-458.114		25.3949	703.37	119.543	-2.18591	-73.373
25.4056	233		25.4056	210		25.4056	258		25.408	371.912			25.408	49799		25.408	756.763		25.408	1145.21	197.195	-175.851	-467.114		25.408	661.703	119.043	2.81409	-64.0396
25.4187	255		25.4187	248		25.4187	257		25.4212	380.012			25.4212	52299		25.4212	2356.76		25.4212	1145.21	221.195	-162.351	-465.614		25.4212	690.037	123.043	15.3141	-64.7063
25.4319	232		25.4319	204		25.4319	265		25.4343	379.412			25.4343	50049		25.4343	90.0962		25.4343	1178.21	236.195	-111.351	-447.614		25.4343	705.037	132.043	8.31409	-72.373
25.445	233		25.445	225		25.445	242		25.4474	383.012			25.4474	52049		25.4474	4890.1		25.4474	1139.21	233.195	-157.851	-479.114		25.4474	688.37	127.043	3.31409	-80.373
25.4581	212		25.4581	249		25.4581	275		25.4606	380.612			25.4606	48049		25.4606	2490.1		25.4606	1172.21	231.695	-160.851	-483.614		25.4606	668.37	119.043	6.81409	-66.373
25.4713	244		25.4713	215		25.4713	245		25.4737	384.512			25.4737	50299		25.4737	-709.904		25.4737	1172.21	248.195	-156.351	-515.114		25.4737	693.37	130.543	12.3141	-73.0396
25.4844	266		25.4844	247		25.4844	272		25.4868	383.312			25.4868	50549		25.4868	2090.1		25.4868	1178.21	227.195	-201.351	-464.114		25.4868	655.037	117.543	11.3141	-79.373
25.4975	239		25.4975	234		25.4975	214		25.4999	384.212			25.4999	49049		25.4999	2756.76		25.4999	1163.21	236.195	-153.351	-480.614		25.4999	678.37	117.043	14.3141	-73.0396
25.5107	271		25.5107	227		25.5107	226		25.5131	381.812			25.5131	50299		25.5131	5423.43		25.5131	1163.21	198.695	-132.351	-434.114		25.5131	688.37	114.543	0.81409	-74.7063
25.5238	257		25.5238	259		25.5238	242		25.5262	393.512			25.5262	49799		25.5262	890.096		25.5262	1187.21	189.695	-148.851	-509.114		25.5262	675.037	129.043	10.8141	-75.7063
25.5369	238		25.5369	264		25.5369	223		25.5393	394.412			25.5393	50549		25.5393	-2309.9		25.5393	1199.21	215.195	-117.351	-477.614		25.5393	688.37	122.043	8.31409	-68.7063
25.5501	259		25.5501	240		25.5501	248		25.5525	387.812			25.5525	51299		25.5525	1023.43		25.5525	1184.21	239.195	-196.851	-486.614		25.5525	695.037	121.543	-1.18591	-71.373
25.5632	247		25.5632	258		25.5632	257		25.5656	380.612			25.5656	43549		25.5656	3290.1		25.5656	1175.21	212.195	-126.351	-506.114		25.5656	690.037	130.043	10.8141	-68.0396
25.5763	234		25.5763	240		25.5763	265		25.5787	387.212			25.5787	45549		25.5787	2623.43		25.5787	1148.21	225.695	-147.351	-471.614		25.5787	706.703	119.043	12.3141	-76.0396
25.5894	286		25.5894	256		25.5894	258		25.5919	379.412			25.5919	48549		25.5919	5156.76		25.5919	1166.21	248.195	-151.851	-477.614		25.5919	720.037	117.043	9.31409	-76.0396
25.6026	267		25.6026	232		25.6026	237		25.605	387.512			25.605	47799		25.605	890.096		25.605	1148.21	204.695	-138.351	-423.614		25.605	693.37	105.543	15.3141	-70.373
25.6157	258		25.6157	231		25.6157	265		25.6181	390.212			25.6181	49549		25.6181	3290.1		25.6181	1178.21	191.195	-150.351	-441.614		25.6181	701.703	122.543	18.8141	-71.373
25.6288	216		25.6288	219		25.6288	287		25.6312	385.712			25.6312	45799		25.6312	-443.237		25.6312	1193.21	203.195	-153.351	-473.114		25.6312	676.703	127.043	24.8141	-74.0396
25.642	232		25.642	280		25.642	231		25.6444	393.512			25.6444	47549		25.6444	1690.1		25.6444	1250.21	212.195	-139.851	-482.114		25.6444	660.037	120.543	1.81409	-67.7063
25.6551	232		25.6551	232		25.6551	282		25.6575	387.812			25.6575	46799		25.6575	-709.904		25.6575	1145.21	267.695	-160.851	-467.114		25.6575	685.037	118.543	8.81409	-76.0396
25.6682	276		25.6682	225		25.6682	257		25.6706	388.412			25.6706	52549		25.6706	4490.1		25.6706	1154.21	230.195	-198.351	-477.614		25.6706	673.37	116.043	10.8141	-67.0396
25.6814	238		25.6814	256		25.6814	241		25.6838	395.012			25.6838	47049		25.6838	4623.43		25.6838	1178.21	209.195	-154.851	-477.614		25.6838	683.37	133.043	28.8141	-70.7063
25.6945	264		25.6945	224		25.6945	262		25.6969	401.012			25.6969	46049		25.6969	3556.76		25.6969	1169.21	213.695	-169.851	-459.614		25.6969	655.037	120.543	6.31409	-64.0396
25.7076	290		25.7076	224		25.7076	256		25.71	402.812			25.71	45549		25.71	4090.1		25.71	1133.21	233.195	-151.851	-443.114		25.71	670.037	111.043	7.31409	-69.0396
25.7207	258		25.7207	268		25.7207	264		25.7232	411.212			25.7232	49049		25.7232	756.763		25.7232	1154.21	213.695	-144.351	-450.614		25.7232	701.703	148.043	9.31409	-75.7063
25.7339	240		25.7339	246		25.7339	232		25.7363	403.712			25.7363	47299		25.7363	2890.1		25.7363	1166.21	213.695	-115.851	-480.614		25.7363	671.703	134.543	1.31409	-71.373
25.747	266		25.747	258		25.747	235		25.7494	401.312			25.7494	48049		25.7494	890.096		25.7494	1169.21	195.695	-151.851	-479.114		25.7494	683.37	116.543	7.81409	-63.7063
25.7601	272		25.7601	280		25.7601	259		25.7625	403.412			25.7625	45799		25.7625	2356.76		25.7625	1184.21	198.695	-196.851	-495.614		25.7625	701.703	146.543	-3.18591	-71.373
25.7733	244		25.7733	263		25.7733	239		25.7757	400.712			25.7757	49049		25.7757	-1776.57		25.7757	1190.21	210.695	-111.351	-446.114		25.7757	695.037	153.543	-5.68591	-69.373
25.7864	277		25.7864	257		25.7864	257		25.7888	405.812			25.7888	43549		25.7888	6623.43		25.7888	1136.21	242.195	-144.351	-447.614		25.7888	695.037	138.043	24.3141	-71.373
25.7995	305		25.7995	262		25.7995	246		25.8019	411.212			25.8019	45299		25.8019	623.43		25.8019	1148.21	225.695	-168.351	-479.114		25.8019	665.037	136.543	18.3141	-75.373
25.8127	274		25.8127	293		25.8127	272		25.8151	404.312			25.8151	47049		25.8151	3956.76		25.8151	1160.21	251.195	-144.351	-474.614		25.8151	683.37	141.543	4.31409	-68.0396
25.8258	297		25.8258	283		25.8258	284		25.8282	407.012			25.8282	50299		25.8282	6490.1		25.8282	1145.21	243.695	-168.351	-441.614		25.8282	706.703	157.543	25.8141	-76.0396
25.8389	273		25.8389	280		25.8389	259		25.8413	405.212			25.8413	53549		25.8413	4890.1		25.8413	1148.21	212.195	-148.851	-468.614		25.8413	698.37	143.043	3.31409	-67.0396
25.852	264		25.852	269		25.852	263		25.8544	416.312			25.8544	50299		25.8544	5290.1		25.8544	1133.21	230.195	-177.351	-476.114		25.8544	710.037	135.543	19.3141	-65.0396
25.8652	286		25.8652	274		25.8652	277		25.8676	413.312			25.8676	51299		25.8676	4090.1		25.8676	1136.21	245.195	-192.351	-468.614		25.8676	651.703	147.543	23.8141	-68.373
25.8783	339		25.8783	282		25.8783	279		25.8807	424.712			25.8807	46299		25.8807	2623.43		25.8807	1148.21	221.195	-168.351	-459.614		25.8807	653.37	153.543	10.8141	-67.373
25.8914	279		25.8914	310		25.8914	294		25.8938	421.412			25.8938	55299		25.8938	1290.1		25.8938	1142.21	218.195	-165.351	-458.114		25.8938	695.037	145.043	14.8141	-65.0396
25.9046	250		25.9046	294		25.9046	242		25.907	415.112			25.907	47299		25.907	1423.43		25.907	1178.21	224.195	-171.351	-482.114		25.907	691.703	153.043	21.3141	-70.7063
25.9177	286		25.9177	273		25.9177	268		25.9201	428.912			25.9201	47299		25.9201	4890.1		25.9201	1163.21	213.695	-151.851	-488.114		25.9201	688.37	144.543	13.3141	-76.373
25.9308	274		25.9308	296		25.9308	264		25.9332	429.212			25.9332	46299		25.9332	3690.1		25.9332	1199.21	195.695	-127.851	-444.614		25.9332	678.37	140.043	32.3141	-73.0396
25.944	283		25.944	274		25.944	279		25.9464	426.212			25.9464	48299		25.9464	-3243.24		25.9464	1175.21	195.695	-210.351	-468.614		25.9464	680.037	139.543	7.31409	-69.373
25.9571	287		25.9571	240		25.9571	277		25.9595	431.612			25.9595	53549		25.9595	4756.76		25.9595	1139.21	215.195	-220.851	-459.614		25.9595	688.37	153.543	7.81409	-74.7063
25.9702	301		25.9702	269		25.9702	263		25.9726	429.812			25.9726	49549		25.9726	2223.43		25.9726	1181.21	200.195	-190.851	-450.614		25.9726	683.37	131.543	33.3141	-67.373
25.9834	279		25.9834	284		25.9834	258		25.9858	422.612			25.9858	46549		25.9858	4890.1		25.9858	1154.21	195.695	-117.351	-503.114		25.9858	688.37	136.543	33.8141	-70.373
25.9965	286		25.9965	316		25.9965	260		25.9989	428.012			25.9989	49049		25.9989	90.0962		25.9989	1175.21	227.195	-183.351	-506.114		25.9989	686.703	127.043	26.8141	-66.0396
26.0096	271		26.0096	311		26.0096	236		26.012	425.912			26.012	50049		26.012	-709.904		26.012	1136.21	197.195	-157.851	-506.114		26.012	683.37	140.043	33.3141	-66.0396
26.0227	235		26.0227	313		26.0227	265		26.0252	425.012			26.0252	47549		26.0252	-2443.24		26.0252	1112.21	173.195	-151.851	-441.614		26.0252	671.703	136.043	11.3141	-77.0396
26.0359	292		26.0359	297		26.0359	268		26.0383	427.112			26.0383	49549		26.0383	1290.1		26.0383	1157.21	200.195	-141.351	-455.114		26.0383	668.37	131.543	20.3141	-62.373
26.049	304		26.049	296		26.049	243		26.0514	412.412			26.0514	47799		26.0514	-1776.57		26.0514	1148.21	174.695	-171.351	-461.114		26.0514	673.37	138.543	29.3141	-62.7063
26.0621	289		26.0621	281		26.0621	228		26.0645	419.912			26.0645	45799		26.0645	4356.76		26.0645	1163.21	216.695	-156.351	-470.114		26.0645	678.37	141.043	23.8141	-68.7063
26.0753	268		26.0753	292		26.0753	274		26.0777	413.612			26.0777	52549		26.0777	4890.1		26.0777	1112.21	206.195	-157.851	-483.614		26.0777	673.37	129.543	30.3141	-66.7063
26.0884	267		26.0884	296		26.0884	235		26.0908	413.912			26.0908	45799		26.0908	356.763		26.0908	1154.21	212.195	-189.351	-432.614		26.0908	685.037	103.043	12.3141	-61.7063
26.1015	248		26.1015	277		26.1015	239		26.1039	406.112			26.1039	47049		26.1039	490.096		26.1039	1154.21	206.195	-147.351	-453.614		26.1039	688.37	135.543	32.8141	-60.7063
26.1147	277		26.1147	270		26.1147	276		26.1171	410.912			26.1171	47049		26.1171	4090.1		26.1171	1181.21	225.695	-171.351	-461.114		26.1171	685.037	122.543	43.3141	-71.0396
26.1278	258		26.1278	284		26.1278	288		26.1302	407.012			26.1302	51049		26.1302	2090.1		26.1302	1094.21	237.695	-172.851	-503.114		26.1302	675.037	146.543	18.8141	-56.0396
26.1409	260		26.1409	229		26.1409	227		26.1433	398.912			26.1433	48799		26.1433	3823.43		26.1433	1166.21	212.195	-169.851	-443.114		26.1433	708.37	122.043	33.8141	-61.373
26.1541	275		26.1541	272		26.1541	247		26.1564	392.312			26.1564	49549		26.1564	1823.43		26.1564	1127.21	207.695	-163.851	-512.114		26.1564	673.37	122.043	33.3141	-66.7063
26.1672	268		26.1672	244		26.1672	267		26.1696	400.112			26.1696	49049		26.1696	2223.43		26.1696	1178.21	212.195	-157.851	-470.114		26.1696	676.703	123.543	34.8141	-63.7063
26.1803	276		26.1803	291		26.1803	240		26.1827	403.412			26.1827	48549		26.1827	5423.43		26.1827	1136.21	201.695	-183.351	-473.114		26.1827	708.37	129.543	37.8141	-67.7063
26.1934	300		26.1934	266		26.1934	284		26.1958	397.112			26.1958	50299		26.1958	3156.76		26.1958	1163.21	194.195	-150.351	-486.614		26.1958	703.37	114.043	35.8141	-66.0396
26.2066	261		26.2066	276		26.2066	241		26.209	396.512			26.209	44299		26.209	4756.76		26.209	1139.21	212.195	-174.351	-468.614		26.209	683.37	121.043	29.3141	-66.7063
26.2197	258		26.2197	255		26.2197	239		26.2221	392.612			26.2221	50299		26.2221	1423.43		26.2221	1184.21	221.195	-193.851	-462.614		26.2221	670.037	127.043	23.3141	-56.7063
26.2328	298		26.2328	247		26.2328	244		26.2352	388.712			26.2352	42549		26.2352	2090.1		26.2352	1121.21	198.695	-217.851	-485.114		26.2352	691.703	100.543	13.8141	-58.373
26.246	244		26.246	247		26.246	262		26.2484	384.512			26.2484	45299		26.2484	2223.43		26.2484	1142.21	189.695	-126.351	-474.614		26.2484	700.037	109.543	34.8141	-60.7063
26.2591	243		26.2591	228		26.2591	243		26.2615	393.812			26.2615	44299		26.2615	5423.43		26.2615	1133.21	176.195	-184.851	-498.614		26.2615	681.703	120.543	15.3141	-73.373
26.2722	230		26.2722	232		26.2722	243		26.2746	380.312			26.2746	52299		26.2746	-1776.57		26.2746	1196.21	171.695	-154.851	-449.114		26.2746	685.037	119.043	14.8141	-67.7063
26.2854	228		26.2854	232		26.2854	231		26.2877	380.912			26.2877	49799		26.2877	-5109.9		26.2877	1136.21	201.695	-157.851	-485.114		26.2877	703.37	115.043	25.3141	-70.373
26.2985	234		26.2985	241		26.2985	248		26.3009	383.312			26.3009	52049		26.3009	3823.43		26.3009	1145.21	221.195	-148.851	-528.614		26.3009	660.037	112.543	19.3141	-73.0396
26.3116	248		26.3116	232		26.3116	256		26.314	387.212			26.314	51049		26.314	1956.76		26.314	1130.21	222.695	-178.851	-471.614		26.314	680.037	110.043	9.31409	-72.7063
26.3247	269		26.3247	235		26.3247	216		26.3271	386.912			26.3271	49049		26.3271	356.763		26.3271	1112.21	210.695	-189.351	-485.114		26.3271	681.703	113.043	21.8141	-68.0396
26.3379	247		26.3379	243		26.3379	230		26.3403	385.412			26.3403	48299		26.3403	4756.76		26.3403	1202.21	207.695	-139.851	-461.114		26.3403	655.037	120.043	20.3141	-72.373
26.351	248		26.351	236		26.351	210		26.3534	384.512			26.3534	46049		26.3534	1956.76		26.3534	1169.21	216.695	-130.851	-470.114		26.3534	663.37	113.043	7.81409	-74.0396
26.3641	255		26.3641	273		26.3641	236		26.3665	385.112			26.3665	44549		26.3665	-3509.9		26.3665	1157.21	195.695	-205.851	-467.114		26.3665	681.703	139.543	18.8141	-79.0396
26.3773	219		26.3773	226		26.3773	273		26.3797	379.112			26.3797	47549		26.3797	3156.76		26.3797	1136.21	215.195	-195.351	-494.114		26.3797	665.037	113.043	12.8141	-72.0396
26.3904	239		26.3904	236		26.3904	269		26.3928	382.112			26.3928	51549		26.3928	5690.1		26.3928	1142.21	198.695	-159.351	-464.114		26.3928	685.037	120.543	11.3141	-67.373
26.4035	237		26.4035	225		26.4035	210		26.4059	382.412			26.4059	50299		26.4059	356.763		26.4059	1169.21	165.695	-178.851	-479.114		26.4059	683.37	137.043	12.8141	-76.0396
26.4167	206		26.4167	218		26.4167	216		26.4191	384.812			26.4191	48049		26.4191	1023.43		26.4191	1148.21	194.195	-168.351	-500.114		26.4191	676.703	114.543	4.81409	-67.373
26.4298	224		26.4298	219		26.4298	250		26.4322	382.112			26.4322	46049		26.4322	490.096		26.4322	1136.21	194.195	-172.851	-474.614		26.4322	685.037	118.543	11.8141	-72.7063
26.4429	228		26.4429	197		26.4429	241		26.4453	381.512			26.4453	52799		26.4453	1556.76		26.4453	1166.21	206.195	-162.351	-458.114		26.4453	686.703	104.543	4.81409	-68.373
26.4561	212		26.4561	257		26.4561	266		26.4584	377.012			26.4584	47549		26.4584	-43.2371		26.4584	1163.21	156.695	-184.851	-522.614		26.4584	673.37	118.043	20.8141	-74.373
26.4692	229		26.4692	224		26.4692	227		26.4716	378.512			26.4716	47299		26.4716	6090.1		26.4716	1163.21	225.695	-151.851	-477.614		26.4716	700.037	112.043	-2.18591	-71.0396
26.4823	228		26.4823	217		26.4823	219		26.4847	378.512			26.4847	46549		26.4847	2756.76		26.4847	1145.21	201.695	-195.351	-504.614		26.4847	686.703	100.543	13.3141	-72.373
26.4954	248		26.4954	234		26.4954	229		26.4978	376.112			26.4978	41799		26.4978	2356.76		26.4978	1202.21	179.195	-181.851	-471.614		26.4978	698.37	116.543	14.3141	-74.7063
26.5086	248		26.5086	204		26.5086	222		26.511	382.112			26.511	48549		26.511	2890.1		26.511	1154.21	206.195	-159.351	-489.614		26.511	678.37	127.543	-4.68591	-66.7063
26.5217	227		26.5217	213		26.5217	233		26.5241	378.212			26.5241	45799		26.5241	-1243.24		26.5241	1124.21	213.695	-162.351	-488.114		26.5241	671.703	114.043	-0.68591	-74.0396
26.5348	267		26.5348	231		26.5348	210		26.5372	382.412			26.5372	53299		26.5372	-176.57		26.5372	1148.21	180.695	-150.351	-486.614		26.5372	676.703	104.543	6.81409	-71.0396
26.548	249		26.548	228		26.548	233		26.5504	380.012			26.5504	48549		26.5504	3290.1		26.5504	1202.21	207.695	-159.351	-513.614		26.5504	668.37	124.543	4.31409	-79.7063
26.5611	240		26.5611	208		26.5611	260		26.5635	378.212			26.5635	46549		26.5635	1690.1		26.5635	1163.21	183.695	-169.851	-476.114		26.5635	660.037	107.043	1.81409	-66.7063
26.5742	221		26.5742	259		26.5742	245		26.5766	379.712			26.5766	47799		26.5766	3556.76		26.5766	1115.21	177.695	-157.851	-516.614		26.5766	671.703	116.043	12.8141	-70.7063
26.5874	235		26.5874	242		26.5874	212		26.5897	377.012			26.5897	48049		26.5897	-2843.24		26.5897	1139.21	200.195	-178.851	-512.114		26.5897	693.37	106.043	6.81409	-78.7063
26.6005	237		26.6005	226		26.6005	235		26.6029	391.112			26.6029	48049		26.6029	1023.43		26.6029	1172.21	204.695	-163.851	-503.114		26.6029	700.037	103.543	13.8141	-73.0396
26.6136	245		26.6136	189		26.6136	229		26.616	377.912			26.616	50799		26.616	3556.76		26.616	1157.21	219.695	-202.851	-476.114		26.616	666.703	117.043	20.3141	-71.7063
26.6267	247		26.6267	216		26.6267	236		26.6291	377.912			26.6291	51299		26.6291	2223.43		26.6291	1163.21	183.695	-165.351	-516.614		26.6291	678.37	106.043	2.31409	-74.0396
26.6399	204		26.6399	256		26.6399	236		26.6423	381.212			26.6423	47549		26.6423	490.096		26.6423	1121.21	198.695	-196.851	-501.614		26.6423	681.703	110.043	-5.18591	-72.0396
26.653	211		26.653	210		26.653	227		26.6554	380.312			26.6554	54049		26.6554	5956.76		26.6554	1082.21	221.195	-178.851	-521.114		26.6554	693.37	105.543	2.31409	-72.373
26.6661	228		26.6661	226		26.6661	248		26.6685	377.012			26.6685	42049		26.6685	-3243.24		26.6685	1109.21	216.695	-177.351	-486.614		26.6685	686.703	100.543	10.8141	-73.373
26.6793	240		26.6793	198		26.6793	255		26.6817	374.612			26.6817	46299		26.6817	-576.57		26.6817	1130.21	180.695	-193.851	-479.114		26.6817	655.037	119.043	2.31409	-69.373
26.6924	240		26.6924	215		26.6924	214		26.6948	381.512			26.6948	50549		26.6948	3823.43		26.6948	1157.21	215.195	-165.351	-489.614		26.6948	690.037	110.543	5.31409	-73.373
26.7055	272		26.7055	220		26.7055	260		26.7079	382.112			26.7079	52049		26.7079	1423.43		26.7079	1145.21	204.695	-187.851	-456.614		26.7079	668.37	111.543	4.31409	-76.7063
26.7187	238		26.7187	236		26.7187	213		26.7211	372.212			26.7211	47299		26.7211	-176.57		26.7211	1127.21	176.195	-180.351	-479.114		26.7211	683.37	117.043	19.8141	-74.0396
26.7318	261		26.7318	227		26.7318	240		26.7342	376.112			26.7342	42299		26.7342	-43.2371		26.7342	1154.21	198.695	-189.351	-492.614		26.7342	655.037	105.543	12.3141	-64.7063
26.7449	210		26.7449	259		26.7449	246		26.7473	371.312			26.7473	45799		26.7473	756.763		26.7473	1184.21	200.195	-169.851	-498.614		26.7473	663.37	117.043	4.31409	-71.0396
26.758	231		26.758	243		26.758	235		26.7604	379.112			26.7604	48799		26.7604	-1509.9		26.7604	1127.21	213.695	-138.351	-453.614		26.7604	686.703	123.543	0.31409	-72.7063
26.7712	209		26.7712	200		26.7712	229		26.7736	376.412			26.7736	47299		26.7736	-3109.9		26.7736	1112.21	174.695	-181.851	-470.114		26.7736	653.37	114.043	1.81409	-79.373
26.7843	221		26.7843	221		26.7843	231		26.7867	380.912			26.7867	44299		26.7867	1156.76		26.7867	1160.21	195.695	-142.851	-476.114		26.7867	670.037	113.043	3.31409	-66.7063
26.7974	256		26.7974	236		26.7974	221		26.7998	377.912			26.7998	49799		26.7998	1023.43		26.7998	1151.21	200.195	-160.851	-492.614		26.7998	688.37	105.043	3.31409	-72.0396
26.8106	228		26.8106	225		26.8106	216		26.813	381.212			26.813	49549		26.813	1156.76		26.813	1148.21	185.195	-205.851	-488.114		26.813	676.703	111.543	-1.68591	-73.0396
26.8237	256		26.8237	215		26.8237	215		26.8261	378.812			26.8261	49549		26.8261	-3509.9		26.8261	1154.21	200.195	-156.351	-489.614		26.8261	676.703	103.043	7.81409	-72.373
26.8368	242		26.8368	223		26.8368	220		26.8392	379.412			26.8392	50549		26.8392	490.096		26.8392	1139.21	203.195	-171.351	-491.114		26.8392	678.37	103.543	0.31409	-73.373
26.85	214		26.85	228		26.85	265		26.8524	378.512			26.8524	48049		26.8524	2756.76		26.8524	1175.21	180.695	-183.351	-473.114		26.8524	656.703	117.543	1.81409	-65.373
26.8631	199		26.8631	242		26.8631	224		26.8655	375.512			26.8655	48549		26.8655	2090.1		26.8655	1142.21	201.695	-178.851	-483.614		26.8655	648.37	110.043	4.81409	-67.7063
26.8762	213		26.8762	218		26.8762	233		26.8786	377.312			26.8786	48549		26.8786	2890.1		26.8786	1103.21	176.195	-193.851	-467.114		26.8786	711.703	115.043	6.81409	-66.0396
26.8894	221		26.8894	210		26.8894	243		26.8917	377.012			26.8917	48049		26.8917	-976.57		26.8917	1142.21	233.195	-175.851	-479.114		26.8917	706.703	101.543	-10.1859	-72.0396
26.9025	235		26.9025	195		26.9025	219		26.9049	379.712			26.9049	43049		26.9049	2756.76		26.9049	1100.21	191.195	-171.351	-497.114		26.9049	678.37	109.043	-4.18591	-64.7063
26.9156	260		26.9156	231		26.9156	227		26.918	379.712			26.918	48299		26.918	223.43		26.918	1151.21	197.195	-126.351	-471.614		26.918	666.703	103.043	-0.68591	-80.0396
26.9287	245		26.9287	239		26.9287	201		26.9311	378.812			26.9311	48299		26.9311	623.43		26.9311	1115.21	201.695	-175.851	-470.114		26.9311	663.37	111.043	-0.68591	-67.7063
26.9419	197		26.9419	210		26.9419	238		26.9443	374.312			26.9443	47299		26.9443	2623.43		26.9443	1121.21	197.195	-153.351	-446.114		26.9443	663.37	115.043	9.81409	-71.373
26.955	228		26.955	235		26.955	196		26.9574	377.912			26.9574	47799		26.9574	2223.43		26.9574	1139.21	218.195	-172.851	-498.614		26.9574	670.037	115.543	-7.68591	-64.0396
26.9681	217		26.9681	197		26.9681	234		26.9705	375.512			26.9705	46799		26.9705	756.763		26.9705	1109.21	192.695	-151.851	-501.614		26.9705	675.037	98.5433	2.81409	-67.373
26.9813	273		26.9813	197		26.9813	270		26.9837	371.312			26.9837	45299		26.9837	-1509.9		26.9837	1073.21	183.695	-195.351	-483.614		26.9837	693.37	111.043	-3.18591	-73.373
26.9944	285		26.9944	201		26.9944	212		26.9968	375.512			26.9968	49299		26.9968	-576.57		26.9968	1187.21	182.195	-168.351	-455.114		26.9968	655.037	92.5433	11.3141	-72.7063
27.0075	245		27.0075	227		27.0075	233		27.0099	379.712			27.0099	49549		27.0099	756.763		27.0099	1121.21	194.195	-162.351	-515.114		27.0099	660.037	127.543	18.8141	-79.373
27.0206	232		27.0206	211		27.0206	241		27.0231	375.212			27.0231	50549		27.0231	-1243.24		27.0231	1193.21	198.695	-201.351	-492.614		27.0231	668.37	129.043	-17.1859	-75.373
27.0338	218		27.0338	212		27.0338	228		27.0362	374.312			27.0362	47049		27.0362	3956.76		27.0362	1136.21	212.195	-162.351	-485.114		27.0362	683.37	104.043	3.31409	-70.7063
27.0469	227		27.0469	216		27.0469	218		27.0493	373.712			27.0493	47049		27.0493	1156.76		27.0493	1145.21	191.195	-147.351	-447.614		27.0493	668.37	113.543	-8.68591	-72.373
27.06	223		27.06	216		27.06	241		27.0624	377.012			27.0624	49299		27.0624	490.096		27.0624	1172.21	198.695	-151.851	-447.614		27.0624	676.703	107.543	8.31409	-77.0396
27.0732	214		27.0732	225		27.0732	225		27.0756	381.512			27.0756	50299		27.0756	-5109.9		27.0756	1145.21	192.695	-147.351	-486.614		27.0756	683.37	102.543	18.8141	-82.0396
27.0863	227		27.0863	239		27.0863	225		27.0887	378.512			27.0887	52299		27.0887	1423.43		27.0887	1118.21	213.695	-172.851	-509.114		27.0887	663.37	115.543	5.31409	-71.373
27.0994	239		27.0994	227		27.0994	205		27.1018	372.212			27.1018	48049		27.1018	-1643.24		27.1018	1133.21	191.195	-166.851	-431.114		27.1018	678.37	113.543	-11.6859	-66.7063
27.1126	210		27.1126	228		27.1126	232		27.115	374.012			27.115	45549		27.115	2490.1		27.115	1154.21	198.695	-166.851	-494.114		27.115	673.37	113.043	-8.68591	-73.373
27.1257	238		27.1257	233		27.1257	217		27.1281	373.412			27.1281	44299		27.1281	623.43		27.1281	1100.21	207.695	-136.851	-467.114		27.1281	673.37	108.543	-1.68591	-72.373
27.1388	231		27.1388	216		27.1388	229		27.1412	374.612			27.1412	50549		27.1412	-976.57		27.1412	1160.21	183.695	-174.351	-462.614		27.1412	681.703	117.543	-4.68591	-80.373
27.1519	210		27.1519	190		27.1519	220		27.1544	379.412			27.1544	47799		27.1544	90.0962		27.1544	1157.21	233.195	-175.851	-474.614		27.1544	678.37	116.543	-7.68591	-79.0396
27.1651	222		27.1651	203		27.1651	239		27.1675	375.812			27.1675	50299		27.1675	1690.1		27.1675	1181.21	182.195	-217.851	-482.114		27.1675	665.037	123.543	-1.18591	-74.373
27.1782	218		27.1782	211		27.1782	243		27.1806	374.612			27.1806	41049		27.1806	1290.1		27.1806	1112.21	195.695	-175.851	-507.614		27.1806	653.37	120.043	13.8141	-75.7063
27.1913	234		27.1913	233		27.1913	239		27.1937	381.812			27.1937	45049		27.1937	1690.1		27.1937	1097.21	227.195	-166.851	-485.114		27.1937	691.703	115.043	9.31409	-67.373
27.2045	225		27.2045	220		27.2045	198		27.2069	372.512			27.2069	44049		27.2069	1156.76		27.2069	1127.21	207.695	-187.851	-513.614		27.2069	678.37	115.543	6.31409	-68.7063
27.2176	235		27.2176	216		27.2176	225		27.22	371.612			27.22	49299		27.22	-1109.9		27.22	1130.21	198.695	-159.351	-473.114		27.22	663.37	118.543	-6.18591	-73.7063
27.2307	237		27.2307	217		27.2307	215		27.2331	372.512			27.2331	47299		27.2331	-43.2371		27.2331	1139.21	198.695	-199.851	-495.614		27.2331	663.37	109.543	8.31409	-68.373
27.2439	240		27.2439	224		27.2439	225		27.2463	377.012			27.2463	50049		27.2463	1556.76		27.2463	1136.21	186.695	-169.851	-461.114		27.2463	670.037	108.543	-0.18591	-73.0396
27.257	239		27.257	218		27.257	225		27.2594	377.612			27.2594	45299		27.2594	-176.57		27.2594	1181.21	182.195	-153.351	-488.114		27.2594	680.037	131.043	14.3141	-76.373
27.2701	209		27.2701	208		27.2701	224		27.2725	380.012			27.2725	47049		27.2725	-4843.24		27.2725	1109.21	198.695	-193.851	-468.614		27.2725	668.37	98.5433	4.31409	-76.0396
27.2832	233		27.2832	219		27.2832	186		27.2857	375.212			27.2857	46299		27.2857	3290.1		27.2857	1139.21	194.195	-180.351	-461.114		27.2857	676.703	108.043	12.3141	-76.7063
27.2964	236		27.2964	201		27.2964	226		27.2988	380.912			27.2988	43049		27.2988	1423.43		27.2988	1184.21	185.195	-181.851	-498.614		27.2988	656.703	111.043	9.31409	-83.7063
27.3095	236		27.3095	209		27.3095	235		27.3119	380.312			27.3119	46549		27.3119	-4309.9		27.3119	1136.21	180.695	-174.351	-510.614		27.3119	653.37	130.543	1.81409	-72.7063
27.3226	230		27.3226	195		27.3226	224		27.3251	383.612			27.3251	48049		27.3251	2356.76		27.3251	1133.21	209.195	-184.851	-510.614		27.3251	703.37	116.043	2.31409	-71.7063
27.3358	184		27.3358	209		27.3358	233		27.3382	373.712			27.3382	48049		27.3382	-976.57		27.3382	1118.21	213.695	-181.851	-489.614		27.3382	668.37	119.543	-5.68591	-78.7063
27.3489	204		27.3489	202		27.3489	242		27.3513	383.612			27.3513	48549		27.3513	1023.43		27.3513	1136.21	206.195	-208.851	-431.114		27.3513	671.703	110.043	-3.18591	-82.373
27.362	213		27.362	209		27.362	212		27.3644	378.212			27.3644	45049		27.3644	-1909.9		27.3644	1133.21	180.695	-172.851	-473.114		27.3644	673.37	115.043	-2.18591	-72.0396
27.3752	241		27.3752	202		27.3752	237		27.3776	377.012			27.3776	43549		27.3776	-1909.9		27.3776	1136.21	183.695	-193.851	-437.114		27.3776	708.37	100.543	-1.18591	-75.0396
27.3883	231		27.3883	227		27.3883	268		27.3907	375.812			27.3907	47299		27.3907	-576.57		27.3907	1121.21	212.195	-172.851	-492.614		27.3907	648.37	115.043	-1.68591	-75.7063
27.4014	210		27.4014	195		27.4014	231		27.4038	379.112			27.4038	48299		27.4038	1823.43		27.4038	1127.21	183.695	-192.351	-461.114		27.4038	661.703	101.043	-5.18591	-74.373
27.4146	221		27.4146	205		27.4146	224		27.417	380.912			27.417	48299		27.417	-3109.9		27.417	1091.21	213.695	-163.851	-453.614		27.417	685.037	107.543	-11.6859	-78.373
27.4277	210		27.4277	219		27.4277	216		27.4301	369.212			27.4301	44799		27.4301	-976.57		27.4301	1142.21	194.195	-178.851	-470.114		27.4301	660.037	100.043	-5.18591	-74.0396
27.4408	226		27.4408	200		27.4408	224		27.4432	381.812			27.4432	46299		27.4432	1156.76		27.4432	1157.21	174.695	-150.351	-450.614		27.4432	678.37	104.043	-9.18591	-71.7063
27.4539	218		27.4539	202		27.4539	217		27.4564	370.412			27.4564	45549		27.4564	-1909.9		27.4564	1133.21	209.195	-159.351	-494.114		27.4564	656.703	107.043	-10.6859	-69.0396
27.4671	233		27.4671	233		27.4671	221		27.4695	379.412			27.4695	47799		27.4695	2756.76		27.4695	1193.21	194.195	-190.851	-492.614		27.4695	683.37	110.043	-0.68591	-73.0396
27.4802	220		27.4802	209		27.4802	215		27.4826	380.612			27.4826	47799		27.4826	4223.43		27.4826	1145.21	209.195	-160.851	-498.614		27.4826	655.037	121.043	-7.68591	-66.373
27.4933	219		27.4933	192		27.4933	212		27.4957	370.712			27.4957	44299		27.4957	490.096		27.4957	1121.21	191.195	-166.851	-504.614		27.4957	698.37	116.043	8.31409	-78.0396
27.5065	240		27.5065	202		27.5065	219		27.5089	379.712			27.5089	46299		27.5089	-443.237		27.5089	1148.21	183.695	-160.851	-462.614		27.5089	691.703	111.543	-11.6859	-72.0396
27.5196	265		27.5196	233		27.5196	228		27.522	376.412			27.522	46049		27.522	890.096		27.522	1079.21	182.195	-168.351	-482.114		27.522	668.37	99.5433	-5.18591	-74.0396
27.5327	219		27.5327	203		27.5327	203		27.5351	388.412			27.5351	46049		27.5351	-3243.24		27.5351	1160.21	197.195	-190.851	-512.114		27.5351	698.37	121.543	8.31409	-66.7063
27.5459	207		27.5459	206		27.5459	228		27.5483	371.012			27.5483	42549		27.5483	-43.2371		27.5483	1139.21	204.695	-199.851	-477.614		27.5483	653.37	109.043	-10.1859	-77.373
27.559	238		27.559	192		27.559	176		27.5614	380.012			27.5614	47549		27.5614	-309.904		27.5614	1130.21	197.195	-180.351	-477.614		27.5614	660.037	101.543	-1.18591	-76.373
27.5721	221		27.5721	212		27.5721	234		27.5745	378.212			27.5745	44799		27.5745	-1243.24		27.5745	1139.21	200.195	-192.351	-491.114		27.5745	666.703	96.5433	-11.6859	-74.0396
27.5852	223		27.5852	204		27.5852	245		27.5877	376.412			27.5877	48799		27.5877	2356.76		27.5877	1121.21	203.195	-187.851	-488.114		27.5877	653.37	116.043	6.31409	-74.0396
27.5984	192		27.5984	206		27.5984	226		27.6008	380.912			27.6008	45799		27.6008	490.096		27.6008	1115.21	215.195	-133.851	-504.614		27.6008	683.37	103.043	9.31409	-74.373
27.6115	258		27.6115	232		27.6115	214		27.6139	373.112			27.6139	47799		27.6139	-443.237		27.6139	1121.21	192.695	-147.351	-536.114		27.6139	686.703	114.043	0.81409	-75.0396
27.6246	237		27.6246	241		27.6246	210		27.627	377.912			27.627	46549		27.627	-4576.57		27.627	1148.21	239.195	-165.351	-474.614		27.627	676.703	104.543	7.81409	-76.373
27.6378	264		27.6378	256		27.6378	204		27.6402	394.712			27.6402	42799		27.6402	-1376.57		27.6402	1094.21	177.695	-174.351	-476.114		27.6402	703.37	107.043	2.31409	-74.0396
27.6509	248		27.6509	224		27.6509	223		27.6533	380.312			27.6533	45799		27.6533	-1376.57		27.6533	1127.21	212.195	-171.351	-477.614		27.6533	666.703	117.043	-10.1859	-77.7063
27.664	272		27.664	208		27.664	197		27.6664	373.712			27.6664	46049		27.6664	623.43		27.6664	1106.21	209.195	-171.351	-452.114		27.6664	676.703	106.043	-0.68591	-75.373
27.6772	213		27.6772	182		27.6772	228		27.6796	384.812			27.6796	45799		27.6796	-1109.9		27.6796	1127.21	207.695	-163.851	-477.614		27.6796	671.703	100.543	1.81409	-73.7063
27.6903	214		27.6903	216		27.6903	248		27.6927	384.212			27.6927	46549		27.6927	-6976.57		27.6927	1115.21	186.695	-168.351	-489.614		27.6927	666.703	108.543	3.31409	-79.0396
27.7034	207		27.7034	223		27.7034	226		27.7058	381.212			27.7058	43799		27.7058	1823.43		27.7058	1112.21	185.195	-126.351	-471.614		27.7058	666.703	104.543	0.31409	-81.0396
27.7166	240		27.7166	200		27.7166	231		27.7189	376.112			27.7189	47049		27.7189	223.43		27.7189	1133.21	203.195	-171.351	-495.614		27.7189	670.037	130.043	8.81409	-74.7063
27.7297	229		27.7297	222		27.7297	217		27.7321	373.112			27.7321	45549		27.7321	-976.57		27.7321	1142.21	177.695	-141.351	-489.614		27.7321	673.37	97.0433	8.31409	-76.7063
27.7428	221		27.7428	204		27.7428	226		27.7452	374.612			27.7452	43799		27.7452	1690.1		27.7452	1088.21	179.195	-186.351	-506.114		27.7452	650.037	107.043	-2.68591	-74.0396
27.7559	223		27.7559	233		27.7559	192		27.7584	374.912			27.7584	48549		27.7584	-1776.57		27.7584	1127.21	204.695	-174.351	-530.114		27.7584	676.703	107.543	3.81409	-74.7063
27.7691	222		27.7691	201		27.7691	256		27.7715	376.412			27.7715	45299		27.7715	-1509.9		27.7715	1133.21	191.195	-204.351	-501.614		27.7715	650.037	115.043	4.31409	-69.373
27.7822	217		27.7822	262		27.7822	229		27.7846	384.212			27.7846	47299		27.7846	-1776.57		27.7846	1097.21	222.695	-148.851	-495.614		27.7846	675.037	107.043	-6.18591	-69.373
27.7953	208		27.7953	225		27.7953	235		27.7977	381.512			27.7977	49049		27.7977	-5376.57		27.7977	1178.21	230.195	-172.851	-486.614		27.7977	676.703	114.543	10.8141	-69.373
27.8085	211		27.8085	234		27.8085	240		27.8109	380.612			27.8109	44549		27.8109	-843.237		27.8109	1136.21	209.195	-166.851	-494.114		27.8109	670.037	100.043	2.81409	-74.0396
27.8216	230		27.8216	187		27.8216	201		27.824	378.812			27.824	44799		27.824	2223.43		27.824	1100.21	194.195	-186.351	-447.614		27.824	668.37	111.043	11.3141	-72.373
27.8347	234		27.8347	219		27.8347	198		27.8371	379.112			27.8371	46549		27.8371	-3109.9		27.8371	1085.21	176.195	-166.851	-497.114		27.8371	690.037	102.543	8.31409	-72.7063
27.8479	224		27.8479	216		27.8479	212		27.8503	377.012			27.8503	48299		27.8503	-1376.57		27.8503	1148.21	204.695	-156.351	-452.114		27.8503	666.703	109.543	8.31409	-74.373
27.861	211		27.861	200		27.861	236		27.8634	376.112			27.8634	45549		27.8634	1290.1		27.8634	1187.21	182.195	-168.351	-498.614		27.8634	651.703	108.043	9.81409	-73.0396
27.8741	246		27.8741	226		27.8741	237		27.8765	379.112			27.8765	47049		27.8765	223.43		27.8765	1145.21	170.195	-157.851	-498.614		27.8765	653.37	113.543	1.31409	-77.373
27.8873	216		27.8873	217		27.8873	237		27.8896	384.812			27.8896	43799		27.8896	-5109.9		27.8896	1157.21	165.695	-162.351	-416.114		27.8896	668.37	113.043	-3.68591	-69.7063
27.9004	220		27.9004	188		27.9004	235		27.9028	380.912			27.9028	46549		27.9028	-5109.9		27.9028	1124.21	185.195	-190.851	-500.114		27.9028	670.037	114.543	0.81409	-76.373
27.9135	213		27.9135	191		27.9135	238		27.9159	389.312			27.9159	45299		27.9159	-1509.9		27.9159	1136.21	186.695	-165.351	-498.614		27.9159	658.37	115.543	-4.18591	-70.7063
27.9266	238		27.9266	205		27.9266	221		27.929	387.512			27.929	47299		27.929	-7243.24		27.929	1196.21	197.195	-165.351	-489.614		27.929	690.037	112.543	-3.68591	-73.7063
27.9398	219		27.9398	214		27.9398	236		27.9422	378.512			27.9422	50049		27.9422	-43.2371		27.9422	1166.21	182.195	-147.351	-498.614		27.9422	661.703	119.043	18.8141	-80.0396
27.9529	232		27.9529	201		27.9529	227		27.9553	385.412			27.9553	45799		27.9553	490.096		27.9553	1118.21	203.195	-118.851	-467.114		27.9553	646.703	111.543	-1.68591	-76.373
27.966	241		27.966	230		27.966	200		27.9684	380.312			27.9684	46299		27.9684	-1376.57		27.9684	1145.21	212.195	-177.351	-476.114		27.9684	690.037	113.043	-4.18591	-68.373
27.9792	218		27.9792	220		27.9792	222		27.9816	384.512			27.9816	44799		27.9816	356.763		27.9816	1136.21	177.695	-195.351	-509.114		27.9816	691.703	127.043	-3.18591	-72.7063
27.9923	187		27.9923	219		27.9923	219		27.9947	375.212			27.9947	48299		27.9947	623.43		27.9947	1154.21	218.195	-193.851	-516.614		27.9947	655.037	107.043	-6.68591	-68.0396
28.0054	240		28.0054	227		28.0054	224		28.0078	385.412			28.0078	43549		28.0078	-43.2371		28.0078	1157.21	218.195	-168.351	-456.614		28.0078	676.703	124.043	9.81409	-73.0396
28.0186	222		28.0186	195		28.0186	227		28.0209	382.112			28.0209	47299		28.0209	-5909.9		28.0209	1106.21	170.195	-207.351	-480.614		28.0209	668.37	109.543	-4.18591	-78.0396
28.0317	222		28.0317	187		28.0317	241		28.0341	376.712			28.0341	47049		28.0341	-2576.57		28.0341	1133.21	227.195	-201.351	-468.614		28.0341	651.703	98.5433	11.3141	-73.373
28.0448	237		28.0448	230		28.0448	236		28.0472	383.612			28.0472	44299		28.0472	-976.57		28.0472	1142.21	188.195	-141.351	-482.114		28.0472	706.703	112.543	-10.6859	-78.7063
28.0579	232		28.0579	201		28.0579	261		28.0603	385.112			28.0603	48299		28.0603	-1776.57		28.0603	1160.21	191.195	-147.351	-504.614		28.0603	678.37	117.543	-18.6859	-73.0396
28.0711	245		28.0711	222		28.0711	230		28.0735	388.712			28.0735	43799		28.0735	-4576.57		28.0735	1130.21	192.695	-174.351	-500.114		28.0735	673.37	117.043	-8.68591	-75.373
28.0842	233		28.0842	227		28.0842	241		28.0866	381.212			28.0866	45049		28.0866	-1909.9		28.0866	1112.21	174.695	-150.351	-480.614		28.0866	685.037	118.043	-2.18591	-68.7063
28.0973	224		28.0973	211		28.0973	237		28.0997	380.312			28.0997	45299		28.0997	-2709.9		28.0997	1145.21	174.695	-168.351	-477.614		28.0997	691.703	101.543	-2.18591	-72.373
28.1105	207		28.1105	194		28.1105	231		28.1129	385.412			28.1129	47549		28.1129	-2309.9		28.1129	1163.21	216.695	-148.851	-476.114		28.1129	668.37	110.043	3.31409	-71.373
28.1236	180		28.1236	247		28.1236	194		28.126	384.812			28.126	46049		28.126	-6709.9		28.126	1133.21	204.695	-136.851	-458.114		28.126	663.37	111.543	10.8141	-75.0396
28.1367	205		28.1367	246		28.1367	224		28.1391	386.012			28.1391	46549		28.1391	-6576.57		28.1391	1175.21	206.195	-142.851	-483.614		28.1391	680.037	110.043	-9.68591	-73.0396
28.1499	217		28.1499	172		28.1499	214		28.1522	384.812			28.1522	43549		28.1522	-4709.9		28.1522	1127.21	168.695	-210.351	-513.614		28.1522	670.037	108.043	-4.68591	-71.0396
28.163	200		28.163	214		28.163	214		28.1654	383.312			28.1654	52549		28.1654	3290.1		28.1654	1112.21	201.695	-175.851	-528.614		28.1654	678.37	121.543	4.81409	-70.373
28.1761	221		28.1761	218		28.1761	239		28.1785	384.812			28.1785	46299		28.1785	-2576.57		28.1785	1121.21	194.195	-211.851	-537.614		28.1785	680.037	111.543	10.3141	-69.0396
28.1892	218		28.1892	204		28.1892	220		28.1916	386.612			28.1916	47549		28.1916	2890.1		28.1916	1142.21	186.695	-168.351	-486.614		28.1916	670.037	109.043	2.81409	-79.373
28.2024	228		28.2024	222		28.2024	218		28.2048	380.912			28.2048	46799		28.2048	-2043.24		28.2048	1139.21	180.695	-196.851	-495.614		28.2048	656.703	102.543	-4.68591	-79.0396
28.2155	211		28.2155	238		28.2155	202		28.2179	385.712			28.2179	44799		28.2179	-5643.24		28.2179	1127.21	185.195	-145.851	-459.614		28.2179	668.37	130.043	-4.18591	-66.7063
28.2286	246		28.2286	206		28.2286	229		28.231	383.612			28.231	48299		28.231	-4976.57		28.231	1145.21	203.195	-187.851	-482.114		28.231	660.037	110.543	-5.68591	-77.373
28.2418	249		28.2418	213		28.2418	230		28.2442	386.612			28.2442	46549		28.2442	356.763		28.2442	1148.21	204.695	-192.351	-501.614		28.2442	670.037	106.543	-3.68591	-82.0396
28.2549	223		28.2549	203		28.2549	240		28.2573	382.712			28.2573	48799		28.2573	-1376.57		28.2573	1142.21	180.695	-177.351	-480.614		28.2573	665.037	103.543	-9.18591	-73.7063
28.268	235		28.268	204		28.268	207		28.2704	383.012			28.2704	47799		28.2704	-2576.57		28.2704	1115.21	201.695	-180.351	-483.614		28.2704	690.037	109.043	3.31409	-69.7063
28.2812	199		28.2812	219		28.2812	232		28.2836	388.412			28.2836	45049		28.2836	-2709.9		28.2836	1166.21	188.195	-172.851	-497.114		28.2836	675.037	104.543	1.81409	-66.0396
28.2943	216		28.2943	232		28.2943	218		28.2967	377.612			28.2967	48549		28.2967	-5509.9		28.2967	1169.21	201.695	-195.351	-525.614		28.2967	690.037	111.543	-3.68591	-72.0396
28.3074	214		28.3074	222		28.3074	226		28.3098	383.912			28.3098	46049		28.3098	-7109.9		28.3098	1151.21	188.195	-163.851	-495.614		28.3098	681.703	99.5433	-11.1859	-68.373
28.3206	234		28.3206	216		28.3206	213		28.3229	387.512			28.3229	44549		28.3229	-1109.9		28.3229	1172.21	200.195	-177.351	-467.114		28.3229	676.703	117.543	6.81409	-73.373
28.3337	255		28.3337	190		28.3337	207		28.3361	385.112			28.3361	41299		28.3361	-5376.57		28.3361	1169.21	191.195	-177.351	-498.614		28.3361	680.037	98.5433	-6.68591	-77.7063
28.3468	202		28.3468	227		28.3468	207		28.3492	382.712			28.3492	47049		28.3492	-1909.9		28.3492	1136.21	192.695	-207.351	-476.114		28.3492	683.37	122.543	-15.1859	-82.0396
28.3599	214		28.3599	233		28.3599	215		28.3623	387.512			28.3623	49799		28.3623	-4576.57		28.3623	1118.21	209.195	-163.851	-497.114		28.3623	660.037	116.043	7.81409	-66.373
28.3731	179		28.3731	205		28.3731	204		28.3755	390.812			28.3755	53549		28.3755	-6176.57		28.3755	1112.21	245.195	-142.851	-422.114		28.3755	708.37	107.543	0.81409	-66.7063
28.3862	233		28.3862	238		28.3862	217		28.3886	385.712			28.3886	41799		28.3886	-3376.57		28.3886	1163.21	222.695	-181.851	-449.114		28.3886	666.703	106.543	-1.68591	-77.373
28.3993	215		28.3993	258		28.3993	201		28.4017	381.512			28.4017	47049		28.4017	890.096		28.4017	1112.21	204.695	-169.851	-516.614		28.4017	656.703	107.543	-16.6859	-70.0396
28.4125	223		28.4125	213		28.4125	222		28.4149	386.912			28.4149	44299		28.4149	-2043.24		28.4149	1151.21	207.695	-210.351	-495.614		28.4149	670.037	105.043	-7.18591	-73.7063
28.4256	262		28.4256	227		28.4256	215		28.428	385.712			28.428	44049		28.428	-843.237		28.428	1163.21	221.195	-190.851	-503.114		28.428	663.37	114.043	-8.68591	-70.7063
28.4387	204		28.4387	216		28.4387	224		28.4411	382.112			28.4411	45549		28.4411	-8043.24		28.4411	1109.21	240.695	-178.851	-491.114		28.4411	698.37	106.543	3.31409	-67.0396
28.4519	210		28.4519	204		28.4519	201		28.4542	379.712			28.4542	42549		28.4542	-1776.57		28.4542	1133.21	269.195	-144.351	-471.614		28.4542	653.37	114.543	3.31409	-75.373
28.465	237		28.465	230		28.465	221		28.4674	385.112			28.4674	42549		28.4674	1023.43		28.4674	1151.21	324.695	-202.851	-480.614		28.4674	671.703	101.043	3.81409	-64.373
28.4781	242		28.4781	206		28.4781	208		28.4805	383.312			28.4805	48049		28.4805	-1376.57		28.4805	1085.21	740.195	-187.851	-480.614		28.4805	663.37	113.043	-2.18591	-65.0396
28.4912	216		28.4912	207		28.4912	204		28.4936	387.212			28.4936	43299		28.4936	-843.237		28.4936	1112.21	929.195	-187.851	-477.614		28.4936	673.37	120.043	-1.18591	-70.373
28.5044	213		28.5044	230		28.5044	211		28.5068	384.812			28.5068	46299		28.5068	-4709.9		28.5068	1193.21	704.195	-147.351	-467.114		28.5068	660.037	105.043	6.81409	-75.0396
28.5175	232		28.5175	207		28.5175	228		28.5199	382.112			28.5199	45049		28.5199	-4709.9		28.5199	1148.21	428.195	-165.351	-482.114		28.5199	660.037	107.543	-10.1859	-72.7063
28.5306	220		28.5306	216		28.5306	231		28.533	380.912			28.533	46799		28.533	-3243.24		28.533	1121.21	314.195	-181.851	-483.614		28.533	668.37	111.543	-2.68591	-76.0396
28.5438	207		28.5438	236		28.5438	224		28.5462	386.012			28.5462	43549		28.5462	-3109.9		28.5462	1109.21	315.695	-156.351	-503.114		28.5462	703.37	98.0433	-6.68591	-70.0396
28.5569	226		28.5569	199		28.5569	231		28.5593	383.312			28.5593	43049		28.5593	-3109.9		28.5593	1163.21	530.195	-196.851	-492.614		28.5593	668.37	106.543	-1.18591	-71.373
28.57	236		28.57	213		28.57	221		28.5724	387.212			28.5724	45299		28.5724	-1376.57		28.5724	1109.21	560.195	-189.351	-486.614		28.5724	665.037	109.543	-0.68591	-72.0396
28.5831	267		28.5831	247		28.5831	195		28.5856	384.512			28.5856	46299		28.5856	-4709.9		28.5856	1154.21	338.195	-166.851	-456.614		28.5856	660.037	118.543	-5.68591	-71.373
28.5963	220		28.5963	205		28.5963	220		28.5987	382.112			28.5987	44799		28.5987	756.763		28.5987	1136.21	240.695	-183.351	-483.614		28.5987	641.703	108.543	7.31409	-72.0396
28.6094	205		28.6094	207		28.6094	224		28.6118	386.612			28.6118	46549		28.6118	-2309.9		28.6118	1151.21	225.695	-177.351	-494.114		28.6118	673.37	113.043	6.81409	-76.0396
28.6225	213		28.6225	224		28.6225	221		28.6249	380.612			28.6249	44049		28.6249	-976.57		28.6249	1112.21	221.195	-159.351	-492.614		28.6249	676.703	104.043	-8.68591	-67.0396
28.6357	209		28.6357	226		28.6357	230		28.6381	384.512			28.6381	39799		28.6381	-3109.9		28.6381	1124.21	182.195	-205.851	-524.114		28.6381	670.037	104.543	-9.68591	-70.0396
28.6488	201		28.6488	219		28.6488	231		28.6512	388.112			28.6512	43299		28.6512	-8576.57		28.6512	1166.21	210.695	-174.351	-492.614		28.6512	658.37	105.043	-18.1859	-70.373
28.6619	243		28.6619	195		28.6619	219		28.6643	380.012			28.6643	44549		28.6643	-5109.9		28.6643	1121.21	207.695	-220.851	-471.614		28.6643	660.037	113.043	7.81409	-72.0396
28.6751	221		28.6751	210		28.6751	180		28.6775	381.512			28.6775	44549		28.6775	-6176.57		28.6775	1109.21	168.695	-177.351	-503.114		28.6775	675.037	98.5433	-6.68591	-69.373
28.6882	238		28.6882	212		28.6882	202		28.6906	379.412			28.6906	44799		28.6906	-5909.9		28.6906	1139.21	210.695	-139.851	-485.114		28.6906	660.037	105.043	-10.6859	-73.0396
28.7013	223		28.7013	204		28.7013	221		28.7037	380.012			28.7037	48299		28.7037	-6309.9		28.7037	1109.21	174.695	-186.351	-489.614		28.7037	663.37	104.043	-9.18591	-73.7063
28.7145	211		28.7145	229		28.7145	232		28.7169	377.012			28.7169	46299		28.7169	-2309.9		28.7169	1124.21	185.195	-190.851	-446.114		28.7169	663.37	92.5433	-5.18591	-77.7063
28.7276	211		28.7276	198		28.7276	192		28.73	380.312			28.73	39299		28.73	-2309.9		28.73	1124.21	192.695	-186.351	-512.114		28.73	668.37	109.043	-8.68591	-59.7063
28.7407	216		28.7407	220		28.7407	201		28.7431	379.712			28.7431	44299		28.7431	-976.57		28.7431	1136.21	195.695	-190.851	-494.114		28.7431	663.37	111.543	-5.18591	-65.0396
28.7538	201		28.7538	212		28.7538	221		28.7563	384.212			28.7563	42549		28.7563	-2976.57		28.7563	1127.21	198.695	-148.851	-524.114		28.7563	661.703	116.043	-15.1859	-75.373
28.767	218		28.767	208		28.767	205		28.7694	383.312			28.7694	45799		28.7694	-2176.57		28.7694	1127.21	182.195	-172.851	-506.114		28.7694	675.037	106.543	6.31409	-74.373
28.7801	219		28.7801	234		28.7801	219		28.7825	382.712			28.7825	45549		28.7825	-2843.24		28.7825	1094.21	164.195	-183.351	-501.614		28.7825	693.37	110.543	-7.18591	-72.0396
28.7932	225		28.7932	241		28.7932	207		28.7956	380.312			28.7956	46299		28.7956	-4709.9		28.7956	1139.21	185.195	-205.851	-498.614		28.7956	660.037	107.543	-0.18591	-75.373
28.8064	255		28.8064	214		28.8064	216		28.8088	386.612			28.8088	44549		28.8088	-976.57		28.8088	1127.21	146.195	-169.851	-506.114		28.8088	685.037	94.0433	-0.18591	-68.0396
28.8195	211		28.8195	214		28.8195	190		28.8219	385.412			28.8219	41049		28.8219	-8843.24		28.8219	1139.21	153.695	-168.351	-471.614		28.8219	686.703	102.043	5.81409	-72.0396
28.8326	228		28.8326	208		28.8326	207		28.835	383.912			28.835	45299		28.835	-576.57		28.835	1094.21	192.695	-150.351	-476.114		28.835	676.703	118.043	-5.68591	-78.0396
28.8458	209		28.8458	189		28.8458	223		28.8482	384.512			28.8482	48299		28.8482	-2843.24		28.8482	1133.21	183.695	-214.851	-486.614		28.8482	653.37	118.043	-4.68591	-66.373
28.8589	199		28.8589	218		28.8589	239		28.8613	384.212			28.8613	45049		28.8613	-2443.24		28.8613	1115.21	185.195	-238.851	-477.614		28.8613	665.037	104.543	-15.1859	-83.373
28.872	202		28.872	205		28.872	204		28.8744	379.412			28.8744	44049		28.8744	-7243.24		28.8744	1127.21	188.195	-154.851	-515.114		28.8744	676.703	101.543	-0.18591	-66.7063
28.8851	227		28.8851	200		28.8851	196		28.8876	379.712			28.8876	44299		28.8876	-2309.9		28.8876	1139.21	189.695	-187.851	-488.114		28.8876	651.703	112.543	-20.1859	-75.7063
28.8983	207		28.8983	219		28.8983	219		28.9007	383.912			28.9007	42049		28.9007	-843.237		28.9007	1127.21	177.695	-225.351	-528.614		28.9007	680.037	112.543	-4.68591	-78.373
28.9114	206		28.9114	214		28.9114	204		28.9138	383.912			28.9138	40799		28.9138	-2043.24		28.9138	1097.21	201.695	-195.351	-498.614		28.9138	666.703	104.043	-1.68591	-74.0396
28.9245	240		28.9245	207		28.9245	222		28.9269	390.212			28.9269	44299		28.9269	-3509.9		28.9269	1100.21	170.195	-216.351	-491.114		28.9269	660.037	113.543	-1.18591	-62.7063
28.9377	212		28.9377	256		28.9377	189		28.9401	379.112			28.9401	40299		28.9401	-3109.9		28.9401	1100.21	159.695	-183.351	-494.114		28.9401	666.703	104.043	-14.6859	-71.373
28.9508	197		28.9508	204		28.9508	217		28.9532	374.612			28.9532	46799		28.9532	-10843.2		28.9532	1085.21	182.195	-174.351	-512.114		28.9532	678.37	101.043	4.81409	-79.0396
28.9639	176		28.9639	230		28.9639	198		28.9663	384.812			28.9663	45049		28.9663	-1243.24		28.9663	1112.21	159.695	-196.851	-500.114		28.9663	675.037	103.543	-11.1859	-72.0396
28.9771	227		28.9771	203		28.9771	202		28.9795	379.712			28.9795	41549		28.9795	-2043.24		28.9795	1145.21	179.195	-163.851	-503.114		28.9795	656.703	104.043	9.81409	-75.0396
28.9902	230		28.9902	201		28.9902	212		28.9926	375.812			28.9926	41549		28.9926	-576.57		28.9926	1094.21	164.195	-156.351	-452.114		28.9926	673.37	104.043	0.31409	-66.7063
29.0033	181		29.0033	194		29.0033	237		29.0057	375.212			29.0057	40049		29.0057	-1776.57		29.0057	1148.21	161.195	-192.351	-510.614		29.0057	683.37	112.043	7.81409	-79.373
29.0164	225		29.0164	237		29.0164	211		29.0189	375.812			29.0189	41549		29.0189	-4976.57		29.0189	1091.21	197.195	-207.351	-486.614		29.0189	703.37	114.543	-7.18591	-66.7063
29.0296	233		29.0296	199		29.0296	198		29.032	383.312			29.032	45299		29.032	-2843.24		29.032	1112.21	174.695	-169.851	-515.114		29.032	656.703	105.543	10.8141	-74.7063
29.0427	240		29.0427	220		29.0427	207		29.0451	372.212			29.0451	44299		29.0451	-2843.24		29.0451	1076.21	192.695	-165.351	-495.614		29.0451	676.703	99.5433	-3.68591	-71.373
29.0558	217		29.0558	206		29.0558	204		29.0582	378.812			29.0582	43799		29.0582	-2843.24		29.0582	1112.21	167.195	-153.351	-510.614		29.0582	675.037	111.543	-14.1859	-69.7063
29.069	221		29.069	204		29.069	191		29.0714	383.312			29.0714	42049		29.0714	-8176.57		29.0714	1115.21	174.695	-180.351	-515.114		29.0714	666.703	107.043	-0.68591	-66.0396
29.0821	215		29.0821	227		29.0821	170		29.0845	382.412			29.0845	48299		29.0845	-2309.9		29.0845	1139.21	156.695	-189.351	-504.614		29.0845	673.37	108.543	-11.1859	-69.0396
29.0952	227		29.0952	187		29.0952	206		29.0976	379.712			29.0976	41049		29.0976	-843.237		29.0976	1109.21	159.695	-175.851	-534.614		29.0976	663.37	98.0433	1.31409	-75.0396
29.1084	224		29.1084	209		29.1084	226		29.1108	379.412			29.1108	40049		29.1108	-1776.57		29.1108	1151.21	168.695	-165.351	-504.614		29.1108	651.703	102.043	-27.6859	-65.7063
29.1215	204		29.1215	196		29.1215	224		29.1239	382.112			29.1239	44799		29.1239	-309.904		29.1239	1130.21	189.695	-181.851	-480.614		29.1239	650.037	104.543	-8.18591	-72.7063
29.1346	238		29.1346	217		29.1346	207		29.137	383.012			29.137	41799		29.137	-3376.57		29.137	1124.21	173.195	-196.851	-495.614		29.137	680.037	109.543	2.31409	-79.0396
29.1477	223		29.1477	203		29.1477	185		29.1502	378.812			29.1502	39799		29.1502	-2309.9		29.1502	1097.21	132.695	-211.851	-498.614		29.1502	671.703	98.0433	-18.6859	-75.0396
29.1609	198		29.1609	205		29.1609	231		29.1633	368.612			29.1633	45799		29.1633	-176.57		29.1633	1100.21	186.695	-193.851	-513.614		29.1633	660.037	104.043	-14.1859	-69.0396
29.174	212		29.174	192		29.174	220		29.1764	382.712			29.1764	44049		29.1764	-2309.9		29.1764	1160.21	144.695	-202.851	-477.614		29.1764	658.37	105.043	-11.6859	-80.0396
29.1871	181		29.1871	207		29.1871	233		29.1896	378.512			29.1896	42299		29.1896	623.43		29.1896	1133.21	152.195	-148.851	-516.614		29.1896	650.037	98.0433	-8.68591	-73.373
29.2003	197		29.2003	219		29.2003	232		29.2027	386.012			29.2027	39049		29.2027	-1776.57		29.2027	1175.21	158.195	-198.351	-500.114		29.2027	668.37	109.543	-3.68591	-71.0396
29.2134	196		29.2134	206		29.2134	209		29.2158	374.312			29.2158	45549		29.2158	-5776.57		29.2158	1097.21	170.195	-211.851	-512.114		29.2158	663.37	93.0433	2.81409	-69.0396
29.2265	223		29.2265	217		29.2265	229		29.2289	377.312			29.2289	42299		29.2289	356.763		29.2289	1142.21	180.695	-171.351	-498.614		29.2289	695.037	111.043	3.31409	-64.7063
29.2397	191		29.2397	201		29.2397	239		29.2421	376.712			29.2421	44799		29.2421	-2576.57		29.2421	1094.21	185.195	-171.351	-497.114		29.2421	696.703	103.043	-13.1859	-75.373
29.2528	210		29.2528	199		29.2528	198		29.2552	380.912			29.2552	38049		29.2552	-5643.24		29.2552	1139.21	180.695	-199.851	-515.114		29.2552	676.703	114.543	-0.18591	-77.373
29.2659	193		29.2659	217		29.2659	197		29.2683	381.212			29.2683	39549		29.2683	-6709.9		29.2683	1181.21	164.195	-165.351	-480.614		29.2683	680.037	108.043	-0.18591	-75.7063
29.2791	209		29.2791	240		29.2791	220		29.2815	384.512			29.2815	43799		29.2815	-2309.9		29.2815	1106.21	170.195	-165.351	-492.614		29.2815	651.703	109.043	-20.1859	-65.0396
29.2922	218		29.2922	184		29.2922	225		29.2946	382.712			29.2946	45049		29.2946	-5243.24		29.2946	1118.21	164.195	-139.851	-462.614		29.2946	663.37	98.5433	3.81409	-78.0396
29.3053	219		29.3053	197		29.3053	222		29.3077	377.312			29.3077	44049		29.3077	-1909.9		29.3077	1136.21	152.195	-169.851	-500.114		29.3077	666.703	105.043	-7.18591	-79.7063
29.3184	199		29.3184	193		29.3184	232		29.3209	383.312			29.3209	42549		29.3209	-5243.24		29.3209	1103.21	167.195	-165.351	-510.614		29.3209	696.703	109.043	-13.1859	-74.0396
29.3316	206		29.3316	201		29.3316	206		29.334	379.412			29.334	44299		29.334	-2309.9		29.334	1136.21	177.695	-187.851	-471.614		29.334	686.703	95.0433	-3.68591	-64.7063
29.3447	219		29.3447	210		29.3447	196		29.3471	380.012			29.3471	39299		29.3471	-1509.9		29.3471	1115.21	180.695	-154.851	-518.114		29.3471	681.703	98.5433	-7.18591	-78.7063
29.3578	196		29.3578	218		29.3578	226		29.3602	378.812			29.3602	40049		29.3602	-176.57		29.3602	1163.21	174.695	-160.851	-515.114		29.3602	676.703	98.0433	-4.68591	-63.7063
29.371	229		29.371	192		29.371	238		29.3734	375.212			29.3734	40299		29.3734	-4176.57		29.3734	1109.21	153.695	-165.351	-470.114		29.3734	658.37	102.543	-0.68591	-77.7063
29.3841	229		29.3841	219		29.3841	195		29.3865	383.312			29.3865	45049		29.3865	-4709.9		29.3865	1163.21	189.695	-162.351	-485.114		29.3865	693.37	109.043	-11.6859	-67.373
29.3972	229		29.3972	228		29.3972	217		29.3996	371.312			29.3996	43049		29.3996	-8176.57		29.3996	1118.21	189.695	-216.351	-492.614		29.3996	671.703	96.0433	-10.1859	-72.373
29.4104	194		29.4104	213		29.4104	218		29.4128	377.012			29.4128	43049		29.4128	-6176.57		29.4128	1163.21	180.695	-150.351	-524.114		29.4128	648.37	103.043	-1.68591	-70.0396
29.4235	210		29.4235	198		29.4235	185		29.4259	371.912			29.4259	45049		29.4259	-843.237		29.4259	1145.21	168.695	-181.851	-510.614		29.4259	671.703	100.543	-13.6859	-74.373
29.4366	203		29.4366	220		29.4366	206		29.439	375.812			29.439	38799		29.439	223.43		29.439	1151.21	134.195	-168.351	-521.114		29.439	645.037	100.543	-3.18591	-69.0396
29.4498	225		29.4498	232		29.4498	219		29.4521	379.412			29.4521	39049		29.4521	-2843.24		29.4521	1154.21	161.195	-211.851	-497.114		29.4521	676.703	99.5433	-8.18591	-78.7063
29.4629	241		29.4629	273		29.4629	208		29.4653	376.112			29.4653	44049		29.4653	-7509.9		29.4653	1139.21	168.695	-202.851	-488.114		29.4653	661.703	104.043	-0.18591	-78.7063
29.476	234		29.476	266		29.476	219		29.4784	386.612			29.4784	39299		29.4784	-1509.9		29.4784	1133.21	191.195	-187.851	-509.114		29.4784	646.703	100.043	-5.18591	-79.7063
29.4891	218		29.4891	240		29.4891	207		29.4915	380.312			29.4915	46049		29.4915	-3509.9		29.4915	1163.21	156.695	-183.351	-485.114		29.4915	661.703	107.043	-17.1859	-71.7063
29.5023	202		29.5023	230		29.5023	202		29.5047	380.912			29.5047	39049		29.5047	-4843.24		29.5047	1121.21	168.695	-171.351	-485.114		29.5047	666.703	104.043	-18.1859	-71.373
29.5154	224		29.5154	235		29.5154	210		29.5178	380.012			29.5178	39799		29.5178	-6976.57		29.5178	1109.21	149.195	-187.851	-498.614		29.5178	666.703	104.043	-11.6859	-67.7063
29.5285	194		29.5285	239		29.5285	196		29.5309	378.512			29.5309	46049		29.5309	-4843.24		29.5309	1130.21	167.195	-205.851	-489.614		29.5309	673.37	108.043	2.31409	-69.7063
29.5417	184		29.5417	235		29.5417	228		29.5441	375.812			29.5441	47049		29.5441	-2176.57		29.5441	1124.21	168.695	-172.851	-507.614		29.5441	656.703	106.043	-14.6859	-72.7063
29.5548	213		29.5548	203		29.5548	188		29.5572	377.912			29.5572	43299		29.5572	490.096		29.5572	1142.21	156.695	-190.851	-519.614		29.5572	655.037	99.5433	-10.6859	-71.0396
29.5679	208		29.5679	223		29.5679	173		29.5703	376.712			29.5703	39549		29.5703	-2309.9		29.5703	1109.21	144.695	-193.851	-531.614		29.5703	660.037	108.543	-9.68591	-75.0396
29.5811	219		29.5811	196		29.5811	217		29.5834	377.012			29.5834	40299		29.5834	-4443.24		29.5834	1127.21	159.695	-175.851	-530.114		29.5834	663.37	96.0433	-0.68591	-80.0396
29.5942	215		29.5942	153		29.5942	227		29.5966	383.012			29.5966	44799		29.5966	-7776.57		29.5966	1112.21	161.195	-186.351	-531.614		29.5966	670.037	110.043	4.31409	-75.7063
29.6073	178		29.6073	190		29.6073	222		29.6097	383.012			29.6097	42299		29.6097	-5643.24		29.6097	1139.21	192.695	-187.851	-522.614		29.6097	685.037	93.5433	-0.68591	-75.0396
29.6205	210		29.6205	217		29.6205	199		29.6228	373.412			29.6228	37799		29.6228	-5643.24		29.6228	1118.21	167.195	-193.851	-521.114		29.6228	653.37	100.043	-5.18591	-74.373
29.6336	179		29.6336	202		29.6336	227		29.636	378.212			29.636	43049		29.636	2490.1		29.636	1076.21	171.695	-216.351	-536.114		29.636	658.37	105.543	-6.18591	-73.7063
29.6467	200		29.6467	207		29.6467	244		29.6491	384.212			29.6491	42549		29.6491	-5243.24		29.6491	1079.21	176.195	-165.351	-522.614		29.6491	641.703	113.543	-1.68591	-71.0396
29.6598	205		29.6598	191		29.6598	193		29.6622	374.312			29.6622	44049		29.6622	-5643.24		29.6622	1136.21	159.695	-156.351	-509.114		29.6622	663.37	96.0433	-17.1859	-64.373
29.673	196		29.673	180		29.673	221		29.6754	380.912			29.6754	46299		29.6754	-6843.24		29.6754	1175.21	164.195	-187.851	-504.614		29.6754	678.37	96.5433	2.31409	-68.0396
29.6861	201		29.6861	180		29.6861	198		29.6885	379.712			29.6885	39549		29.6885	-3109.9		29.6885	1085.21	161.195	-156.351	-494.114		29.6885	660.037	100.043	-7.18591	-80.7063
29.6992	182		29.6992	198		29.6992	213		29.7016	374.612			29.7016	45049		29.7016	-1909.9		29.7016	1079.21	132.695	-196.851	-489.614		29.7016	678.37	96.0433	1.81409	-75.373
29.7124	204		29.7124	196		29.7124	203		29.7148	379.712			29.7148	43799		29.7148	-7109.9		29.7148	1121.21	171.695	-190.851	-507.614		29.7148	670.037	102.543	-0.68591	-78.373
29.7255	206		29.7255	199		29.7255	210		29.7279	378.812			29.7279	42549		29.7279	-7109.9		29.7279	1103.21	152.195	-186.351	-528.614		29.7279	683.37	106.543	-0.18591	-63.0396
29.7386	183		29.7386	186		29.7386	194		29.741	375.512			29.741	44799		29.741	-309.904		29.741	1094.21	170.195	-187.851	-515.114		29.741	678.37	98.0433	-12.1859	-73.0396
29.7518	206		29.7518	210		29.7518	195		29.7541	375.212			29.7541	41549		29.7541	-5643.24		29.7541	1106.21	161.195	-201.351	-513.614		29.7541	645.037	98.0433	-9.68591	-71.7063
29.7649	196		29.7649	181		29.7649	192		29.7673	376.112			29.7673	41049		29.7673	-6843.24		29.7673	1091.21	144.695	-196.851	-488.114		29.7673	671.703	99.0433	-5.68591	-68.0396
29.778	201		29.778	196		29.778	178		29.7804	379.412			29.7804	44799		29.7804	-3376.57		29.7804	1136.21	173.195	-205.851	-513.614		29.7804	646.703	98.5433	-8.18591	-76.373
29.7911	190		29.7911	215		29.7911	219		29.7935	383.612			29.7935	44549		29.7935	-2976.57		29.7935	1100.21	185.195	-193.851	-524.114		29.7935	651.703	108.543	-0.18591	-69.373
29.8043	233		29.8043	217		29.8043	219		29.8067	377.012			29.8067	44299		29.8067	-2576.57		29.8067	1076.21	147.695	-145.851	-483.614		29.8067	661.703	104.043	-16.1859	-74.7063
29.8174	218		29.8174	213		29.8174	202		29.8198	376.712			29.8198	39799		29.8198	-6576.57		29.8198	1076.21	147.695	-171.351	-513.614		29.8198	665.037	106.043	-10.6859	-67.7063
29.8305	210		29.8305	209		29.8305	213		29.8329	380.312			29.8329	43299		29.8329	-8443.24		29.8329	1112.21	147.695	-187.851	-518.114		29.8329	651.703	101.043	-27.1859	-75.0396
29.8437	233		29.8437	220		29.8437	197		29.8461	378.812			29.8461	45049		29.8461	-6976.57		29.8461	1148.21	164.195	-208.851	-477.614		29.8461	663.37	107.543	-24.1859	-64.373
29.8568	210		29.8568	210		29.8568	229		29.8592	380.912			29.8592	38549		29.8592	-4709.9		29.8592	1142.21	177.695	-147.351	-521.114		29.8592	648.37	101.543	-16.1859	-75.0396
29.8699	204		29.8699	196		29.8699	211		29.8723	378.812			29.8723	43549		29.8723	-443.237		29.8723	1106.21	168.695	-178.851	-507.614		29.8723	648.37	106.043	-14.1859	-74.0396
29.8831	205		29.8831	197		29.8831	235		29.8854	386.312			29.8854	41549		29.8854	-6443.24		29.8854	1124.21	170.195	-174.351	-548.114		29.8854	666.703	93.5433	-10.1859	-80.0396
29.8962	214		29.8962	200		29.8962	200		29.8986	379.412			29.8986	46549		29.8986	-4709.9		29.8986	1079.21	152.195	-181.851	-483.614		29.8986	663.37	109.043	-11.1859	-77.0396
29.9093	218		29.9093	221		29.9093	196		29.9117	380.912			29.9117	39549		29.9117	-2176.57		29.9117	1169.21	156.695	-138.351	-489.614		29.9117	668.37	99.0433	-10.1859	-72.7063
29.9224	195		29.9224	184		29.9224	212		29.9248	380.612			29.9248	43549		29.9248	-4309.9		29.9248	1097.21	153.695	-187.851	-510.614		29.9248	655.037	103.543	-12.1859	-77.0396
29.9356	198		29.9356	199		29.9356	198		29.938	385.412			29.938	41799		29.938	-6176.57		29.938	1118.21	159.695	-198.351	-509.114		29.938	653.37	85.5433	-8.18591	-70.0396
29.9487	232		29.9487	192		29.9487	210		29.9511	390.512			29.9511	42799		29.9511	-5243.24		29.9511	1118.21	173.195	-190.851	-536.114		29.9511	661.703	101.043	-2.18591	-70.373
29.9618	204		29.9618	182		29.9618	210		29.9642	382.412			29.9642	41049		29.9642	-5643.24		29.9642	1145.21	188.195	-208.851	-495.614		29.9642	655.037	98.5433	-7.68591	-66.7063
29.975	206		29.975	196		29.975	228		29.9774	381.812			29.9774	41549		29.9774	-7376.57		29.9774	1106.21	146.195	-192.351	-491.114		29.9774	653.37	110.543	-0.68591	-76.373
29.9881	240		29.9881	200		29.9881	208		29.9905	384.212			29.9905	42299		29.9905	1690.1		29.9905	1064.21	171.695	-192.351	-510.614		29.9905	638.37	113.043	-1.18591	-75.0396
30.0012	204		30.0012	167		30.0012	210		30.0036	383.312			30.0036	43549		30.0036	-1776.57		30.0036	1106.21	150.695	-166.851	-516.614		30.0036	640.037	103.043	-13.1859	-75.7063
30.0144	224		30.0144	211		30.0144	187		30.0167	376.712			30.0167	45299		30.0167	-6709.9		30.0167	1082.21	180.695	-166.851	-506.114		30.0167	665.037	107.043	14.3141	-66.373
30.0275	206		30.0275	203		30.0275	188		30.0299	380.912			30.0299	41549		30.0299	-3243.24		30.0299	1067.21	158.195	-163.851	-533.114		30.0299	651.703	107.043	-13.6859	-77.7063
30.0406	190		30.0406	178		30.0406	176		30.043	374.612			30.043	42799		30.043	-5909.9		30.043	1124.21	177.695	-168.351	-468.614		30.043	645.037	102.043	-8.18591	-71.0396
30.0537	206		30.0537	195		30.0537	189		30.0561	379.712			30.0561	41799		30.0561	223.43		30.0561	1073.21	176.195	-186.351	-516.614		30.0561	655.037	108.043	0.81409	-74.373
30.0669	216		30.0669	186		30.0669	223		30.0693	377.012			30.0693	42299		30.0693	-5909.9		30.0693	1058.21	155.195	-175.851	-464.114		30.0693	645.037	108.543	-14.6859	-72.373
30.08	214		30.08	198		30.08	209		30.0824	380.312			30.0824	40799		30.0824	-5776.57		30.0824	1097.21	128.195	-177.351	-522.614		30.0824	670.037	113.543	-3.68591	-80.7063
30.0931	204		30.0931	192		30.0931	188		30.0955	386.912			30.0955	43299		30.0955	-4843.24		30.0955	1106.21	173.195	-160.851	-477.614		30.0955	673.37	110.043	-21.6859	-66.7063
30.1063	211		30.1063	189		30.1063	213		30.1087	380.912			30.1087	48049		30.1087	-2976.57		30.1087	1109.21	147.695	-154.851	-489.614		30.1087	648.37	101.043	-12.6859	-70.7063
30.1194	257		30.1194	222		30.1194	184		30.1218	382.712			30.1218	43299		30.1218	-5376.57		30.1218	1091.21	171.695	-204.351	-473.114		30.1218	665.037	112.043	-4.68591	-79.373
30.1325	228		30.1325	200		30.1325	207		30.1349	380.312			30.1349	39799		30.1349	-4709.9		30.1349	1112.21	147.695	-181.851	-515.114		30.1349	665.037	93.5433	-15.1859	-78.0396
30.1457	223		30.1457	215		30.1457	192		30.1481	382.412			30.1481	45549		30.1481	-6043.24		30.1481	1142.21	174.695	-193.851	-494.114		30.1481	660.037	111.543	-9.68591	-73.7063
30.1588	221		30.1588	203		30.1588	191		30.1612	375.812			30.1612	46299		30.1612	-709.904		30.1612	1100.21	158.195	-175.851	-533.114		30.1612	655.037	115.543	-2.18591	-73.0396
30.1719	214		30.1719	207		30.1719	211		30.1743	387.812			30.1743	41799		30.1743	-7776.57		30.1743	1055.21	149.195	-178.851	-501.614		30.1743	653.37	112.543	-12.1859	-71.373
30.1851	214		30.1851	200		30.1851	206		30.1874	380.312			30.1874	42299		30.1874	-2443.24		30.1874	1118.21	146.195	-150.351	-515.114		30.1874	640.037	87.0433	-7.68591	-78.373
30.1982	199		30.1982	186		30.1982	203		30.2006	386.912			30.2006	41799		30.2006	-3243.24		30.2006	1106.21	180.695	-175.851	-494.114		30.2006	661.703	108.043	9.81409	-73.0396
30.2113	198		30.2113	181		30.2113	185		30.2137	380.012			30.2137	41299		30.2137	-7909.9		30.2137	1079.21	143.195	-165.351	-467.114		30.2137	660.037	96.0433	-3.18591	-69.7063
30.2244	195		30.2244	163		30.2244	171		30.2268	386.312			30.2268	36799		30.2268	-7643.24		30.2268	1112.21	147.695	-198.351	-512.114		30.2268	650.037	98.0433	-8.18591	-75.0396
30.2376	209		30.2376	174		30.2376	198		30.24	376.712			30.24	42549		30.24	-5509.9		30.24	1127.21	170.195	-174.351	-521.114		30.24	655.037	117.543	-6.68591	-75.0396
30.2507	198		30.2507	211		30.2507	206		30.2531	384.212			30.2531	39549		30.2531	-4309.9		30.2531	1103.21	150.695	-202.851	-515.114		30.2531	653.37	92.0433	-5.18591	-78.0396
30.2638	213		30.2638	177		30.2638	197		30.2662	384.512			30.2662	41049		30.2662	-2176.57		30.2662	1076.21	152.195	-144.351	-507.614		30.2662	633.37	99.5433	-3.18591	-74.7063
30.277	229		30.277	187		30.277	222		30.2794	385.412			30.2794	39549		30.2794	-6443.24		30.2794	1109.21	158.195	-219.351	-527.114		30.2794	658.37	100.543	-8.68591	-66.7063
30.2901	183		30.2901	208		30.2901	199		30.2925	382.712			30.2925	41049		30.2925	-8043.24		30.2925	1148.21	167.195	-183.351	-497.114		30.2925	661.703	108.543	-9.68591	-74.373
30.3032	194		30.3032	180		30.3032	210		30.3056	388.412			30.3056	46799		30.3056	-7643.24		30.3056	1091.21	152.195	-183.351	-519.614		30.3056	650.037	97.0433	-4.18591	-77.373
30.3163	212		30.3163	219		30.3163	213		30.3188	380.612			30.3188	39549		30.3188	-5376.57		30.3188	1157.21	173.195	-163.851	-513.614		30.3188	661.703	110.543	4.31409	-78.373
30.3295	191		30.3295	228		30.3295	211		30.3319	382.412			30.3319	43549		30.3319	-4309.9		30.3319	1109.21	171.695	-187.851	-515.114		30.3319	658.37	91.5433	-12.1859	-75.0396
30.3426	224		30.3426	218		30.3426	208		30.345	387.512			30.345	41549		30.345	1823.43		30.345	1091.21	159.695	-208.851	-477.614		30.345	648.37	109.543	4.31409	-72.373
30.3557	240		30.3557	196		30.3557	172		30.3581	377.912			30.3581	42799		30.3581	-2576.57		30.3581	1118.21	171.695	-192.351	-500.114		30.3581	678.37	113.043	-3.68591	-80.0396
30.3689	222		30.3689	209		30.3689	200		30.3713	383.612			30.3713	44799		30.3713	-2843.24		30.3713	1097.21	153.695	-172.851	-491.114		30.3713	670.037	100.543	-9.18591	-71.373
30.382	222		30.382	182		30.382	207		30.3844	379.112			30.3844	39549		30.3844	-4176.57		30.3844	1124.21	152.195	-198.351	-512.114		30.3844	645.037	98.0433	-2.18591	-75.373
30.3951	207		30.3951	178		30.3951	200		30.3975	396.212			30.3975	42049		30.3975	-4843.24		30.3975	1097.21	167.195	-162.351	-491.114		30.3975	663.37	112.043	-5.18591	-66.373
30.4083	220		30.4083	207		30.4083	181		30.4107	392.312			30.4107	38299		30.4107	-2309.9		30.4107	1115.21	135.695	-160.851	-509.114		30.4107	645.037	103.543	2.31409	-79.373
30.4214	210		30.4214	246		30.4214	208		30.4238	391.112			30.4238	42049		30.4238	-6176.57		30.4238	1100.21	158.195	-169.851	-501.614		30.4238	643.37	113.543	-0.68591	-77.0396
30.4345	213		30.4345	208		30.4345	211		30.4369	392.012			30.4369	45049		30.4369	-2976.57		30.4369	1115.21	170.195	-144.351	-477.614		30.4369	671.703	118.543	2.81409	-69.0396
30.4476	204		30.4476	181		30.4476	199		30.4501	391.112			30.4501	43299		30.4501	-4309.9		30.4501	1109.21	158.195	-189.351	-486.614		30.4501	643.37	109.043	-6.68591	-78.373
30.4608	214		30.4608	197		30.4608	206		30.4632	385.712			30.4632	44299		30.4632	-2443.24		30.4632	1124.21	147.695	-153.351	-519.614		30.4632	673.37	112.543	4.81409	-73.7063
30.4739	213		30.4739	204		30.4739	190		30.4763	383.312			30.4763	41299		30.4763	-3509.9		30.4763	1118.21	170.195	-201.351	-473.114		30.4763	680.037	114.043	-5.68591	-69.373
30.487	225		30.487	191		30.487	200		30.4894	388.412			30.4894	43799		30.4894	-1643.24		30.4894	1094.21	167.195	-202.851	-489.614		30.4894	688.37	94.0433	14.3141	-71.0396
30.5002	224		30.5002	219		30.5002	185		30.5026	394.112			30.5026	43549		30.5026	-3243.24		30.5026	1148.21	162.695	-180.351	-506.114		30.5026	651.703	97.0433	-1.68591	-71.7063
30.5133	227		30.5133	229		30.5133	178		30.5157	386.912			30.5157	44799		30.5157	-3376.57		30.5157	1106.21	155.195	-124.851	-483.614		30.5157	693.37	113.043	-15.1859	-67.0396
30.5264	211		30.5264	206		30.5264	204		30.5288	398.312			30.5288	44299		30.5288	-7509.9		30.5288	1112.21	150.695	-196.851	-516.614		30.5288	658.37	109.043	4.81409	-74.0396
30.5396	198		30.5396	194		30.5396	197		30.542	393.512			30.542	45299		30.542	-5776.57		30.542	1073.21	173.195	-157.851	-476.114		30.542	663.37	119.043	-18.6859	-72.373
30.5527	228		30.5527	213		30.5527	200		30.5551	387.812			30.5551	39299		30.5551	-7243.24		30.5551	1082.21	158.195	-186.351	-492.614		30.5551	671.703	110.543	19.3141	-70.7063
30.5658	263		30.5658	219		30.5658	215		30.5682	387.512			30.5682	45299		30.5682	-5509.9		30.5682	1115.21	158.195	-214.851	-512.114		30.5682	658.37	111.043	-11.1859	-69.373
30.579	219		30.579	234		30.579	158		30.5814	391.712			30.5814	42549		30.5814	-6576.57		30.5814	1085.21	146.195	-184.851	-488.114		30.5814	658.37	104.543	-0.68591	-69.0396
30.5921	199		30.5921	235		30.5921	200		30.5945	403.112			30.5945	43799		30.5945	-1643.24		30.5945	1112.21	155.195	-151.851	-528.614		30.5945	670.037	100.543	-12.1859	-68.7063
30.6052	255		30.6052	221		30.6052	197		30.6076	392.012			30.6076	43049		30.6076	-7509.9		30.6076	1118.21	183.695	-189.351	-498.614		30.6076	670.037	110.043	1.81409	-62.7063
30.6183	218		30.6183	212		30.6183	192		30.6208	392.612			30.6208	43549		30.6208	-3376.57		30.6208	1109.21	162.695	-157.851	-494.114		30.6208	665.037	86.0433	-2.68591	-71.0396
30.6315	205		30.6315	205		30.6315	214		30.6339	390.512			30.6339	40799		30.6339	-3243.24		30.6339	1112.21	179.195	-205.851	-485.114		30.6339	660.037	92.5433	-1.18591	-69.0396
30.6446	191		30.6446	213		30.6446	184		30.647	386.912			30.647	40799		30.647	-5909.9		30.647	1085.21	146.195	-169.851	-491.114		30.647	680.037	112.043	-4.68591	-72.7063
30.6577	220		30.6577	207		30.6577	195		30.6601	389.912			30.6601	42799		30.6601	-2843.24		30.6601	1112.21	137.195	-186.351	-527.114		30.6601	655.037	94.0433	-16.1859	-74.7063
30.6709	224		30.6709	197		30.6709	215		30.6733	392.012			30.6733	39549		30.6733	-8043.24		30.6733	1106.21	158.195	-172.851	-495.614		30.6733	656.703	99.5433	-12.6859	-57.373
30.684	225		30.684	207		30.684	197		30.6864	406.112			30.6864	47299		30.6864	-2843.24		30.6864	1115.21	174.695	-180.351	-503.114		30.6864	643.37	110.043	0.81409	-67.0396
30.6971	231		30.6971	201		30.6971	220		30.6995	392.312			30.6995	44799		30.6995	-6709.9		30.6995	1097.21	171.695	-120.351	-540.614		30.6995	638.37	90.0433	-1.18591	-63.373
30.7103	242		30.7103	228		30.7103	187		30.7127	399.212			30.7127	45049		30.7127	-6043.24		30.7127	1097.21	141.695	-150.351	-530.114		30.7127	660.037	108.043	-3.68591	-67.0396
30.7234	231		30.7234	230		30.7234	219		30.7258	402.212			30.7258	42299		30.7258	-443.237		30.7258	1118.21	152.195	-162.351	-474.614		30.7258	660.037	100.543	-1.68591	-66.7063
30.7365	230		30.7365	216		30.7365	204		30.7389	398.312			30.7389	42799		30.7389	-9509.9		30.7389	1100.21	135.695	-159.351	-449.114		30.7389	646.703	116.543	1.31409	-70.373
30.7496	234		30.7496	197		30.7496	205		30.7521	397.712			30.7521	39299		30.7521	-5776.57		30.7521	1127.21	161.195	-147.351	-489.614		30.7521	643.37	96.0433	-2.18591	-71.7063
30.7628	221		30.7628	202		30.7628	174		30.7652	393.812			30.7652	42799		30.7652	-5376.57		30.7652	1091.21	149.195	-181.851	-483.614		30.7652	666.703	119.043	-1.68591	-77.0396
30.7759	218		30.7759	224		30.7759	186		30.7783	402.212			30.7783	40799		30.7783	-5243.24		30.7783	1133.21	138.695	-142.851	-465.614		30.7783	665.037	105.043	4.81409	-71.0396
30.789	244		30.789	205		30.789	209		30.7914	398.912			30.7914	40549		30.7914	-5243.24		30.7914	1091.21	149.195	-148.851	-477.614		30.7914	663.37	104.043	-0.18591	-69.7063
30.8022	236		30.8022	213		30.8022	205		30.8046	395.612			30.8046	42549		30.8046	-4709.9		30.8046	1085.21	165.695	-141.351	-465.614		30.8046	656.703	112.543	11.8141	-70.373
30.8153	234		30.8153	199		30.8153	194		30.8177	401.012			30.8177	37299		30.8177	-2309.9		30.8177	1103.21	162.695	-153.351	-512.114		30.8177	686.703	97.5433	2.81409	-74.0396
30.8284	236		30.8284	212		30.8284	197		30.8308	412.712			30.8308	45049		30.8308	-6176.57		30.8308	1100.21	150.695	-156.351	-471.614		30.8308	638.37	124.043	-13.1859	-66.7063
30.8416	245		30.8416	206		30.8416	189		30.844	402.212			30.844	41799		30.844	-5243.24		30.844	1085.21	150.695	-156.351	-507.614		30.844	656.703	100.543	1.81409	-67.0396
30.8547	236		30.8547	196		30.8547	184		30.8571	404.612			30.8571	46049		30.8571	-4709.9		30.8571	1163.21	156.695	-123.351	-471.614		30.8571	658.37	119.543	6.31409	-71.373
30.8678	234		30.8678	196		30.8678	207		30.8702	401.912			30.8702	43549		30.8702	-4576.57		30.8702	1082.21	158.195	-148.851	-494.114		30.8702	683.37	108.543	13.3141	-74.373
30.8809	235		30.8809	216		30.8809	214		30.8834	403.412			30.8834	44049		30.8834	-5376.57		30.8834	1109.21	179.195	-130.851	-459.614		30.8834	658.37	112.043	-11.1859	-62.373
30.8941	223		30.8941	205		30.8941	203		30.8965	407.312			30.8965	44799		30.8965	-4443.24		30.8965	1088.21	159.695	-169.851	-498.614		30.8965	653.37	106.543	-2.68591	-64.0396
30.9072	231		30.9072	207		30.9072	195		30.9096	407.612			30.9096	39299		30.9096	-3509.9		30.9096	1109.21	141.695	-63.3514	-473.114		30.9096	676.703	128.543	7.81409	-67.373
30.9203	227		30.9203	228		30.9203	191		30.9227	410.912			30.9227	45299		30.9227	-6176.57		30.9227	1049.21	150.695	-130.851	-485.114		30.9227	648.37	114.543	-2.68591	-72.373
30.9335	225		30.9335	238		30.9335	185		30.9359	406.112			30.9359	48799		30.9359	-5243.24		30.9359	1136.21	134.195	-157.851	-470.114		30.9359	668.37	121.043	2.31409	-64.7063
30.9466	255		30.9466	223		30.9466	176		30.949	413.912			30.949	40049		30.949	-6576.57		30.949	1091.21	173.195	-147.351	-465.614		30.949	646.703	115.043	13.3141	-70.373
30.9597	219		30.9597	211		30.9597	187		30.9621	415.112			30.9621	46549		30.9621	-3109.9		30.9621	1115.21	134.195	-181.851	-473.114		30.9621	648.37	120.543	-7.68591	-60.373
30.9729	258		30.9729	218		30.9729	200		30.9753	421.112			30.9753	43049		30.9753	-3376.57		30.9753	1106.21	165.695	-109.851	-476.114		30.9753	651.703	112.043	20.3141	-62.7063
30.986	224		30.986	267		30.986	203		30.9884	415.112			30.9884	44549		30.9884	-4843.24		30.9884	1085.21	132.695	-105.351	-480.614		30.9884	670.037	128.543	7.81409	-64.0396
30.9991	242		30.9991	208		30.9991	196		31.0015	414.212			31.0015	45549		31.0015	-2176.57		31.0015	1115.21	161.195	-148.851	-492.614		31.0015	656.703	113.543	15.8141	-59.373
31.0123	208		31.0123	279		31.0123	173		31.0147	417.812			31.0147	45549		31.0147	-4309.9		31.0147	1109.21	159.695	-159.351	-476.114		31.0147	656.703	119.043	3.81409	-68.7063
31.0254	231		31.0254	229		31.0254	201		31.0278	412.712			31.0278	43049		31.0278	-1109.9		31.0278	1088.21	198.695	-70.8514	-473.114		31.0278	685.037	124.543	7.31409	-61.373
31.0385	234		31.0385	218		31.0385	189		31.0409	411.812			31.0409	43049		31.0409	-43.2371		31.0409	1133.21	152.195	-135.351	-435.614		31.0409	656.703	128.543	-1.18591	-66.0396
31.0516	227		31.0516	229		31.0516	180		31.0541	422.012			31.0541	40549		31.0541	-5243.24		31.0541	1076.21	159.695	-123.351	-447.614		31.0541	660.037	117.043	14.3141	-69.373
31.0648	222		31.0648	234		31.0648	203		31.0672	421.112			31.0672	38549		31.0672	-7109.9		31.0672	1130.21	156.695	-118.851	-462.614		31.0672	663.37	120.043	1.81409	-68.0396
31.0779	260		31.0779	236		31.0779	213		31.0803	422.912			31.0803	43549		31.0803	-8576.57		31.0803	1109.21	185.195	-120.351	-488.114		31.0803	671.703	106.043	13.8141	-62.0396
31.091	240		31.091	221		31.091	191		31.0934	417.512			31.0934	40549		31.0934	-3509.9		31.0934	1076.21	156.695	-147.351	-473.114		31.0934	660.037	130.043	18.3141	-69.373
31.1042	225		31.1042	225		31.1042	225		31.1066	416.612			31.1066	42049		31.1066	-2976.57		31.1066	1124.21	141.695	-85.8514	-444.614		31.1066	678.37	123.043	-6.68591	-64.0396
31.1173	255		31.1173	239		31.1173	186		31.1197	424.412			31.1197	38549		31.1197	-4576.57		31.1197	1112.21	150.695	-126.351	-455.114		31.1197	675.037	118.543	24.8141	-55.0396
31.1304	263		31.1304	226		31.1304	216		31.1328	420.512			31.1328	41799		31.1328	-5243.24		31.1328	1106.21	149.195	-70.8514	-452.114		31.1328	653.37	112.543	13.8141	-69.0396
31.1436	268		31.1436	223		31.1436	198		31.146	430.712			31.146	42299		31.146	-2576.57		31.146	1103.21	168.695	-82.8514	-461.114		31.146	668.37	120.543	33.8141	-62.373
31.1567	238		31.1567	218		31.1567	195		31.1591	419.012			31.1591	43799		31.1591	-1776.57		31.1591	1106.21	170.195	-46.8514	-434.114		31.1591	676.703	120.543	25.8141	-63.7063
31.1698	255		31.1698	226		31.1698	225		31.1722	429.212			31.1722	43799		31.1722	-7909.9		31.1722	1076.21	155.195	-70.8514	-437.114		31.1722	661.703	134.043	37.3141	-71.7063
31.183	257		31.183	245		31.183	216		31.1853	422.912			31.1853	42299		31.1853	-1776.57		31.1853	1109.21	170.195	-106.851	-444.614		31.1853	648.37	116.543	9.31409	-60.7063
31.1961	263		31.1961	209		31.1961	218		31.1985	425.012			31.1985	44549		31.1985	-1643.24		31.1985	1115.21	200.195	-121.851	-437.114		31.1985	653.37	145.543	10.8141	-57.7063
31.2092	235		31.2092	238		31.2092	223		31.2116	432.512			31.2116	42549		31.2116	-309.904		31.2116	1115.21	170.195	-111.351	-471.614		31.2116	668.37	116.043	22.8141	-59.7063
31.2223	275		31.2223	265		31.2223	220		31.2247	426.512			31.2247	41299		31.2247	-1776.57		31.2247	1085.21	155.195	-66.3514	-480.614		31.2247	675.037	131.043	27.8141	-54.373
31.2355	276		31.2355	265		31.2355	224		31.2379	428.612			31.2379	42549		31.2379	223.43		31.2379	1076.21	164.195	-52.8514	-422.114		31.2379	651.703	136.043	28.3141	-54.7063
31.2486	250		31.2486	271		31.2486	186		31.251	435.812			31.251	49299		31.251	-576.57		31.251	1121.21	179.195	-42.3514	-455.114		31.251	650.037	140.043	23.8141	-59.373
31.2617	239		31.2617	265		31.2617	192		31.2641	437.312			31.2641	44799		31.2641	-5909.9		31.2641	1097.21	159.695	-24.3514	-438.614		31.2641	658.37	157.043	49.8141	-52.373
31.2749	268		31.2749	275		31.2749	206		31.2773	440.612			31.2773	41299		31.2773	90.0962		31.2773	1097.21	161.195	-57.3514	-360.614		31.2773	643.37	130.043	22.3141	-55.7063
31.288	280		31.288	232		31.288	215		31.2904	436.412			31.2904	44049		31.2904	-709.904		31.2904	1094.21	159.695	-40.8514	-401.114		31.2904	646.703	135.043	40.3141	-63.0396
31.3011	268		31.3011	258		31.3011	222		31.3035	431.912			31.3035	45049		31.3035	-7509.9		31.3035	1109.21	155.195	-46.8514	-438.614		31.3035	666.703	158.543	47.8141	-55.0396
31.3143	236		31.3143	282		31.3143	222		31.3166	435.212			31.3166	43549		31.3166	3290.1		31.3166	1124.21	162.695	-40.8514	-462.614		31.3166	646.703	122.543	31.3141	-57.7063
31.3274	267		31.3274	274		31.3274	200		31.3298	436.712			31.3298	45799		31.3298	4090.1		31.3298	1112.21	161.195	-12.3514	-441.614		31.3298	655.037	129.543	34.3141	-51.7063
31.3405	289		31.3405	240		31.3405	214		31.3429	432.212			31.3429	44799		31.3429	-2843.24		31.3429	1133.21	201.695	-78.3514	-420.614		31.3429	651.703	145.543	38.3141	-48.373
31.3536	241		31.3536	242		31.3536	211		31.356	447.512			31.356	43049		31.356	-843.237		31.356	1094.21	162.695	-22.8514	-387.614		31.356	646.703	138.543	58.3141	-45.0396
31.3668	303		31.3668	217		31.3668	209		31.3692	436.112			31.3692	46799		31.3692	1023.43		31.3692	1124.21	155.195	-18.3514	-413.114		31.3692	676.703	149.043	51.8141	-48.0396
31.3799	278		31.3799	269		31.3799	202		31.3823	435.512			31.3823	46299		31.3823	-2043.24		31.3823	1130.21	183.695	32.6486	-437.114		31.3823	653.37	141.043	36.8141	-58.0396
31.393	266		31.393	242		31.393	246		31.3954	437.312			31.3954	48799		31.3954	-176.57		31.3954	1133.21	156.695	-19.8514	-414.614		31.3954	655.037	132.043	43.3141	-56.7063
31.4062	240		31.4062	276		31.4062	228		31.4086	439.712			31.4086	40049		31.4086	-1109.9		31.4086	1103.21	173.195	26.6486	-404.114		31.4086	660.037	158.543	49.3141	-58.373
31.4193	313		31.4193	282		31.4193	228		31.4217	437.012			31.4217	43299		31.4217	2623.43		31.4217	1115.21	192.695	-3.35144	-404.114		31.4217	673.37	146.543	56.8141	-58.7063
31.4324	255		31.4324	293		31.4324	193		31.4348	449.312			31.4348	45549		31.4348	-1109.9		31.4348	1106.21	173.195	17.6486	-440.114		31.4348	670.037	142.543	43.8141	-41.7063
31.4456	287		31.4456	264		31.4456	226		31.4479	438.812			31.4479	46799		31.4479	356.763		31.4479	1064.21	180.695	-24.3514	-414.614		31.4479	643.37	145.543	57.3141	-47.373
31.4587	260		31.4587	273		31.4587	216		31.4611	447.812			31.4611	44299		31.4611	3023.43		31.4611	1097.21	174.695	4.14856	-408.614		31.4611	645.037	142.543	48.3141	-43.0396
31.4718	283		31.4718	276		31.4718	235		31.4742	442.712			31.4742	47799		31.4742	90.0962		31.4742	1121.21	194.195	16.1486	-368.114		31.4742	675.037	154.043	47.3141	-51.0396
31.485	278		31.485	273		31.485	212		31.4873	442.412			31.4873	44299		31.4873	356.763		31.4873	1103.21	156.695	38.6486	-339.614		31.4873	628.37	141.043	54.3141	-42.7063
31.4981	289		31.4981	216		31.4981	203		31.5005	449.912			31.5005	47799		31.5005	2356.76		31.5005	1121.21	183.695	26.6486	-357.614		31.5005	636.703	163.543	48.3141	-35.373
31.5112	277		31.5112	259		31.5112	197		31.5136	439.712			31.5136	47549		31.5136	3823.43		31.5136	1124.21	183.695	20.6486	-387.614		31.5136	661.703	154.543	63.8141	-36.0396
31.5243	298		31.5243	285		31.5243	218		31.5267	429.212			31.5267	45549		31.5267	623.43		31.5267	1121.21	173.195	-12.3514	-347.114		31.5267	661.703	159.043	65.3141	-40.0396
31.5375	267		31.5375	285		31.5375	227		31.5399	430.412			31.5399	49799		31.5399	1690.1		31.5399	1076.21	183.695	-15.3514	-413.114		31.5399	685.037	158.043	48.8141	-41.7063
31.5506	310		31.5506	280		31.5506	262		31.553	441.812			31.553	49049		31.553	1023.43		31.553	1091.21	192.695	-15.3514	-410.114		31.553	651.703	154.543	49.3141	-36.7063
31.5637	286		31.5637	282		31.5637	264		31.5661	443.012			31.5661	44299		31.5661	-1909.9		31.5661	1094.21	194.195	17.6486	-374.114		31.5661	655.037	158.543	49.3141	-35.0396
31.5769	272		31.5769	283		31.5769	240		31.5793	440.612			31.5793	43799		31.5793	490.096		31.5793	1094.21	144.695	-21.3514	-387.614		31.5793	643.37	151.543	51.8141	-35.0396
31.59	270		31.59	290		31.59	209		31.5924	441.212			31.5924	44549		31.5924	-1243.24		31.5924	1091.21	183.695	34.1486	-402.614		31.5924	656.703	156.543	60.8141	-35.0396
31.6031	263		31.6031	286		31.6031	226		31.6055	439.412			31.6055	48049		31.6055	2490.1		31.6055	1082.21	179.195	11.6486	-392.114		31.6055	650.037	158.543	64.3141	-36.0396
31.6163	299		31.6163	269		31.6163	233		31.6186	449.312			31.6186	41799		31.6186	-4709.9		31.6186	1109.21	168.695	-37.8514	-369.614		31.6186	648.37	142.043	60.8141	-31.7063
31.6294	293		31.6294	313		31.6294	208		31.6318	431.312			31.6318	40299		31.6318	-443.237		31.6318	1088.21	177.695	-54.3514	-347.114		31.6318	661.703	162.043	48.8141	-31.0396
31.6425	262		31.6425	296		31.6425	231		31.6449	444.512			31.6449	47049		31.6449	-2443.24		31.6449	1064.21	195.695	-13.8514	-351.614		31.6449	668.37	141.043	70.3141	-27.3729
31.6556	264		31.6556	279		31.6556	239		31.658	440.912			31.658	49799		31.658	2090.1		31.658	1091.21	191.195	-9.35144	-348.614		31.658	663.37	150.043	43.3141	-23.3729
31.6688	267		31.6688	297		31.6688	198		31.6712	435.812			31.6712	44549		31.6712	3290.1		31.6712	1109.21	176.195	-9.35144	-386.114		31.6712	646.703	134.543	47.8141	-31.7063
31.6819	246		31.6819	276		31.6819	209		31.6843	432.812			31.6843	40299		31.6843	-1776.57		31.6843	1070.21	201.695	-61.8514	-404.114		31.6843	653.37	144.043	41.3141	-33.7063
31.695	283		31.695	293		31.695	229		31.6974	434.312			31.6974	50549		31.6974	-1909.9		31.6974	1091.21	213.695	-19.8514	-360.614		31.6974	641.703	149.043	61.3141	-24.0396
31.7082	281		31.7082	295		31.7082	199		31.7106	445.712			31.7106	44549		31.7106	-176.57		31.7106	1079.21	204.695	-75.3514	-374.114		31.7106	670.037	148.543	56.3141	-26.7063
31.7213	274		31.7213	282		31.7213	228		31.7237	439.412			31.7237	47549		31.7237	-1243.24		31.7237	1130.21	201.695	-55.8514	-390.614		31.7237	660.037	131.043	45.8141	-28.3729
31.7344	341		31.7344	284		31.7344	210		31.7368	448.412			31.7368	46799		31.7368	-2309.9		31.7368	1091.21	173.195	-90.3514	-366.614		31.7368	651.703	144.043	55.8141	-24.0396
31.7476	278		31.7476	306		31.7476	208		31.7499	451.412			31.7499	47049		31.7499	-709.904		31.7499	1124.21	198.695	-124.851	-398.114		31.7499	686.703	145.043	57.8141	-25.7063
31.7607	259		31.7607	268		31.7607	212		31.7631	447.512			31.7631	44049		31.7631	-709.904		31.7631	1082.21	201.695	-49.8514	-419.114		31.7631	650.037	146.543	52.8141	-29.7063
31.7738	280		31.7738	298		31.7738	243		31.7762	435.812			31.7762	43799		31.7762	-1909.9		31.7762	1088.21	182.195	-75.3514	-398.114		31.7762	656.703	140.043	58.3141	-34.0396
31.7869	309		31.7869	321		31.7869	225		31.7893	449.912			31.7893	46549		31.7893	-5509.9		31.7893	1094.21	198.695	-46.8514	-398.114		31.7893	650.037	139.043	45.3141	-21.7063
31.8001	262		31.8001	306		31.8001	236		31.8025	438.212			31.8025	44049		31.8025	-3509.9		31.8025	1133.21	173.195	-22.8514	-446.114		31.8025	655.037	136.043	46.3141	-35.373
31.8132	283		31.8132	273		31.8132	224		31.8156	446.912			31.8156	40049		31.8156	-2443.24		31.8156	1082.21	203.195	-69.3514	-416.114		31.8156	670.037	138.043	25.3141	-37.7063
31.8263	304		31.8263	300		31.8263	203		31.8287	446.012			31.8287	44049		31.8287	-2043.24		31.8287	1118.21	185.195	-76.8514	-408.614		31.8287	670.037	132.543	40.8141	-23.0396
31.8395	313		31.8395	289		31.8395	219		31.8419	452.612			31.8419	41549		31.8419	-4576.57		31.8419	1079.21	168.695	-91.8514	-423.614		31.8419	658.37	144.543	30.8141	-24.7063
31.8526	257		31.8526	292		31.8526	239		31.855	444.512			31.855	40299		31.855	-4843.24		31.855	1091.21	161.195	-126.351	-446.114		31.855	660.037	141.543	28.8141	-40.7063
31.8657	263		31.8657	315		31.8657	219		31.8681	437.912			31.8681	48049		31.8681	-1109.9		31.8681	1121.21	152.195	-76.8514	-449.114		31.8681	665.037	145.043	35.8141	-31.7063
31.8788	255		31.8788	289		31.8788	209		31.8813	446.912			31.8813	44049		31.8813	-5509.9		31.8813	1133.21	183.695	-90.3514	-432.614		31.8813	676.703	142.543	43.8141	-35.0396
31.892	303		31.892	306		31.892	233		31.8944	444.812			31.8944	45049		31.8944	-4976.57		31.8944	1109.21	177.695	-87.3514	-437.114		31.8944	665.037	143.543	29.3141	-29.0396
31.9051	271		31.9051	289		31.9051	235		31.9075	442.112			31.9075	43299		31.9075	-2043.24		31.9075	1106.21	194.195	-118.851	-459.614		31.9075	651.703	131.543	37.3141	-33.0396
31.9182	305		31.9182	297		31.9182	244		31.9206	447.812			31.9206	42799		31.9206	-2176.57		31.9206	1091.21	191.195	-108.351	-462.614		31.9206	678.37	136.043	27.3141	-32.373
31.9314	327		31.9314	311		31.9314	271		31.9338	449.612			31.9338	45549		31.9338	-6176.57		31.9338	1085.21	186.695	-54.3514	-419.114		31.9338	653.37	142.043	36.8141	-48.373
31.9445	316		31.9445	278		31.9445	218		31.9469	444.812			31.9469	43049		31.9469	-6976.57		31.9469	1112.21	191.195	-156.351	-423.614		31.9469	655.037	134.043	15.8141	-44.373
31.9576	269		31.9576	311		31.9576	208		31.96	443.612			31.96	44049		31.96	-4976.57		31.96	1112.21	182.195	-108.351	-437.114		31.96	651.703	143.043	22.8141	-37.0396
31.9708	283		31.9708	303		31.9708	193		31.9732	448.112			31.9732	45299		31.9732	-309.904		31.9732	1121.21	192.695	-120.351	-441.614		31.9732	648.37	148.543	24.8141	-29.7063
31.9839	278		31.9839	302		31.9839	218		31.9863	440.912			31.9863	38549		31.9863	-4976.57		31.9863	1163.21	158.195	-76.8514	-443.114		31.9863	665.037	127.543	15.3141	-44.0396
31.997	274		31.997	293		31.997	204		31.9994	433.112			31.9994	40049		31.9994	-176.57		31.9994	1094.21	200.195	-136.851	-434.114		31.9994	653.37	147.543	31.8141	-30.0396
32.0102	265		32.0102	275		32.0102	230		32.0126	436.112			32.0126	41799		32.0126	-2043.24		32.0126	1115.21	182.195	-133.851	-485.114		32.0126	670.037	152.543	31.3141	-41.0396
32.0233	308		32.0233	323		32.0233	255		32.0257	456.512			32.0257	43299		32.0257	-2976.57		32.0257	1097.21	182.195	-115.851	-446.114		32.0257	656.703	145.043	28.8141	-32.7063
32.0364	315		32.0364	293		32.0364	234		32.0388	447.512			32.0388	38049		32.0388	-5109.9		32.0388	1106.21	195.695	-136.851	-432.614		32.0388	646.703	152.043	20.3141	-43.0396
32.0496	305		32.0496	299		32.0496	229		32.0519	458.912			32.0519	38049		32.0519	-7243.24		32.0519	1097.21	198.695	-132.351	-461.114		32.0519	651.703	148.043	33.3141	-50.0396
32.0627	302		32.0627	300		32.0627	224		32.0651	443.912			32.0651	42549		32.0651	-4843.24		32.0651	1121.21	194.195	-144.351	-444.614		32.0651	673.37	149.543	32.3141	-47.373
32.0758	286		32.0758	288		32.0758	214		32.0782	448.412			32.0782	43049		32.0782	-4709.9		32.0782	1100.21	159.695	-136.851	-441.614		32.0782	650.037	134.543	14.8141	-41.7063
32.0889	289		32.0889	295		32.0889	213		32.0913	460.112			32.0913	41549		32.0913	-1776.57		32.0913	1097.21	174.695	-135.351	-438.614		32.0913	673.37	150.043	32.3141	-47.0396
32.1021	264		32.1021	271		32.1021	220		32.1045	453.812			32.1045	43549		32.1045	-4976.57		32.1045	1115.21	194.195	-117.351	-423.614		32.1045	656.703	138.043	32.3141	-40.7063
32.1152	279		32.1152	279		32.1152	220		32.1176	455.612			32.1176	41299		32.1176	-2176.57		32.1176	1067.21	179.195	-127.851	-458.114		32.1176	661.703	144.543	35.8141	-50.373
32.1283	295		32.1283	295		32.1283	239		32.1307	445.712			32.1307	45799		32.1307	-2976.57		32.1307	1064.21	183.695	-138.351	-456.614		32.1307	658.37	143.043	20.8141	-45.373
32.1415	267		32.1415	310		32.1415	223		32.1439	445.412			32.1439	40049		32.1439	-4576.57		32.1439	1109.21	191.195	-114.351	-488.114		32.1439	681.703	123.543	22.3141	-51.373
32.1546	284		32.1546	306		32.1546	272		32.157	442.112			32.157	45049		32.157	-2176.57		32.157	1070.21	194.195	-108.351	-443.114		32.157	646.703	139.043	25.3141	-48.0396
32.1677	296		32.1677	335		32.1677	233		32.1701	451.412			32.1701	41799		32.1701	-5643.24		32.1701	1097.21	167.195	-130.851	-431.114		32.1701	651.703	129.043	35.3141	-43.373
32.1808	316		32.1808	278		32.1808	220		32.1833	456.512			32.1833	47049		32.1833	-6576.57		32.1833	1073.21	192.695	-147.351	-461.114		32.1833	658.37	136.043	33.8141	-52.0396
32.194	270		32.194	260		32.194	198		32.1964	446.012			32.1964	41299		32.1964	-1643.24		32.1964	1082.21	171.695	-124.851	-455.114		32.1964	641.703	132.043	32.3141	-30.3729
32.2071	270		32.2071	286		32.2071	228		32.2095	443.912			32.2095	44549		32.2095	-4309.9		32.2095	1115.21	168.695	-126.351	-483.614		32.2095	646.703	141.543	40.8141	-37.373
32.2202	303		32.2202	298		32.2202	219		32.2226	446.312			32.2226	44549		32.2226	-3243.24		32.2226	1082.21	170.195	-162.351	-429.614		32.2226	661.703	138.043	24.3141	-43.373
32.2334	288		32.2334	267		32.2334	221		32.2358	448.412			32.2358	40549		32.2358	-2176.57		32.2358	1124.21	180.695	-132.351	-509.114		32.2358	658.37	134.043	28.3141	-52.7063
32.2465	274		32.2465	316		32.2465	275		32.2489	437.312			32.2489	38799		32.2489	-7109.9		32.2489	1091.21	174.695	-124.851	-468.614		32.2489	650.037	122.543	31.8141	-45.0396
32.2596	276		32.2596	309		32.2596	206		32.262	440.612			32.262	39799		32.262	-6043.24		32.262	1121.21	203.195	-115.851	-456.614		32.262	633.37	144.543	22.3141	-41.373
32.2728	260		32.2728	269		32.2728	213		32.2752	445.712			32.2752	40299		32.2752	-6043.24		32.2752	1130.21	194.195	-166.851	-435.614		32.2752	656.703	136.043	34.8141	-54.7063
32.2859	268		32.2859	310		32.2859	215		32.2883	438.512			32.2883	42549		32.2883	-709.904		32.2883	1076.21	182.195	-154.851	-452.114		32.2883	648.37	129.043	13.3141	-40.7063
32.299	294		32.299	302		32.299	201		32.3014	429.512			32.3014	42299		32.3014	-10843.2		32.3014	1118.21	188.195	-163.851	-449.114		32.3014	671.703	132.043	19.8141	-40.0396
32.3122	295		32.3122	299		32.3122	206		32.3145	431.012			32.3145	43299		32.3145	-5643.24		32.3145	1139.21	209.195	-165.351	-474.614		32.3145	648.37	119.543	43.8141	-42.373
32.3253	257		32.3253	283		32.3253	213		32.3277	438.812			32.3277	41299		32.3277	-4709.9		32.3277	1070.21	192.695	-126.351	-500.114		32.3277	660.037	130.043	22.8141	-45.373
32.3384	268		32.3384	292		32.3384	206		32.3408	426.512			32.3408	39049		32.3408	-2443.24		32.3408	1115.21	150.695	-142.851	-480.614		32.3408	643.37	123.543	25.8141	-52.0396
32.3515	269		32.3515	258		32.3515	196		32.3539	432.212			32.3539	45549		32.3539	-4843.24		32.3539	1112.21	174.695	-112.851	-482.114		32.3539	668.37	129.043	36.3141	-46.373
32.3647	262		32.3647	283		32.3647	197		32.3671	432.512			32.3671	44299		32.3671	-5776.57		32.3671	1061.21	164.195	-190.851	-489.614		32.3671	640.037	114.043	31.3141	-46.373
32.3778	272		32.3778	296		32.3778	214		32.3802	434.912			32.3802	39799		32.3802	-443.237		32.3802	1118.21	203.195	-108.351	-476.114		32.3802	655.037	132.043	7.81409	-49.0396
32.3909	304		32.3909	291		32.3909	209		32.3933	426.812			32.3933	39549		32.3933	-6843.24		32.3933	1103.21	198.695	-156.351	-489.614		32.3933	666.703	131.043	13.3141	-48.7063
32.4041	247		32.4041	258		32.4041	230		32.4065	428.912			32.4065	45299		32.4065	-1643.24		32.4065	1070.21	140.195	-147.351	-476.114		32.4065	645.037	130.043	27.3141	-56.7063
32.4172	271		32.4172	271		32.4172	206		32.4196	422.912			32.4196	44799		32.4196	-6043.24		32.4196	1061.21	197.195	-156.351	-444.614		32.4196	658.37	130.043	14.8141	-47.7063
32.4303	260		32.4303	287		32.4303	216		32.4327	421.712			32.4327	42799		32.4327	-6309.9		32.4327	1070.21	180.695	-123.351	-480.614		32.4327	663.37	118.543	21.3141	-52.0396
32.4435	274		32.4435	306		32.4435	180		32.4459	422.912			32.4459	42799		32.4459	-5643.24		32.4459	1094.21	183.695	-163.851	-455.114		32.4459	653.37	120.043	20.8141	-53.0396
32.4566	234		32.4566	278		32.4566	184		32.459	419.012			32.459	44049		32.459	-4709.9		32.459	1112.21	155.195	-103.851	-485.114		32.459	665.037	136.043	27.3141	-42.7063
32.4697	247		32.4697	264		32.4697	194		32.4721	426.212			32.4721	41299		32.4721	-4176.57		32.4721	1106.21	168.695	-141.351	-480.614		32.4721	643.37	122.543	6.81409	-54.373
32.4828	255		32.4828	305		32.4828	218		32.4853	421.712			32.4853	42299		32.4853	-9243.24		32.4853	1091.21	176.195	-178.851	-500.114		32.4853	630.037	134.543	7.31409	-48.0396
32.496	259		32.496	303		32.496	216		32.4984	427.112			32.4984	38299		32.4984	-5909.9		32.4984	1088.21	191.195	-132.351	-453.614		32.4984	658.37	115.043	8.31409	-43.7063
32.5091	260		32.5091	263		32.5091	231		32.5115	425.012			32.5115	38299		32.5115	-6176.57		32.5115	1079.21	150.695	-156.351	-441.614		32.5115	648.37	132.543	30.3141	-60.7063
32.5222	226		32.5222	280		32.5222	218		32.5246	422.312			32.5246	41049		32.5246	-6576.57		32.5246	1097.21	164.195	-145.851	-461.114		32.5246	631.703	132.543	23.3141	-57.0396
32.5354	256		32.5354	268		32.5354	205		32.5378	424.112			32.5378	45799		32.5378	-5109.9		32.5378	1103.21	182.195	-117.351	-437.114		32.5378	668.37	115.043	8.31409	-49.7063
32.5485	283		32.5485	271		32.5485	200		32.5509	407.912			32.5509	42299		32.5509	-8576.57		32.5509	1061.21	167.195	-147.351	-446.114		32.5509	645.037	130.043	21.3141	-47.0396
32.5616	246		32.5616	260		32.5616	215		32.564	416.912			32.564	44049		32.564	-3109.9		32.564	1106.21	212.195	-133.851	-509.114		32.564	676.703	111.543	8.81409	-63.0396
32.5748	239		32.5748	264		32.5748	219		32.5772	423.212			32.5772	41049		32.5772	-5776.57		32.5772	1103.21	164.195	-145.851	-444.614		32.5772	656.703	110.043	33.3141	-59.373
32.5879	233		32.5879	274		32.5879	187		32.5903	408.812			32.5903	42799		32.5903	-5109.9		32.5903	1088.21	183.695	-141.351	-500.114		32.5903	645.037	111.043	3.31409	-50.373
32.601	234		32.601	262		32.601	194		32.6034	411.212			32.6034	41549		32.6034	-6043.24		32.6034	1085.21	153.695	-175.851	-507.614		32.6034	666.703	120.543	10.8141	-52.7063
32.6142	234		32.6142	215		32.6142	208		32.6165	401.912			32.6165	42549		32.6165	-7643.24		32.6165	1100.21	164.195	-166.851	-455.114		32.6165	655.037	141.543	11.8141	-49.7063
32.6273	231		32.6273	248		32.6273	196		32.6297	411.212			32.6297	43549		32.6297	-2443.24		32.6297	1085.21	149.195	-120.351	-477.614		32.6297	665.037	107.043	10.8141	-59.0396
32.6404	242		32.6404	221		32.6404	207		32.6428	412.112			32.6428	45049		32.6428	-2976.57		32.6428	1079.21	153.695	-172.851	-458.114		32.6428	668.37	127.043	28.8141	-54.373
32.6535	245		32.6535	223		32.6535	227		32.6559	402.812			32.6559	41049		32.6559	-7109.9		32.6559	1097.21	182.195	-165.351	-477.614		32.6559	633.37	109.043	8.81409	-50.7063
32.6667	226		32.6667	245		32.6667	200		32.6691	406.112			32.6691	42549		32.6691	-6309.9		32.6691	1055.21	165.695	-171.351	-492.614		32.6691	635.037	113.043	14.8141	-52.7063
32.6798	235		32.6798	263		32.6798	227		32.6822	391.712			32.6822	39299		32.6822	-8976.57		32.6822	1088.21	159.695	-151.851	-447.614		32.6822	631.703	118.043	2.31409	-52.0396
32.6929	242		32.6929	249		32.6929	209		32.6953	400.712			32.6953	39299		32.6953	-8309.9		32.6953	1091.21	158.195	-144.351	-459.614		32.6953	645.037	131.543	26.3141	-50.0396
32.7061	218		32.7061	247		32.7061	230		32.7085	406.112			32.7085	45049		32.7085	-2976.57		32.7085	1094.21	176.195	-139.851	-474.614		32.7085	651.703	99.5433	15.3141	-56.0396
32.7192	208		32.7192	266		32.7192	185		32.7216	410.612			32.7216	42049		32.7216	-7376.57		32.7216	1073.21	143.195	-153.351	-486.614		32.7216	655.037	106.043	26.8141	-45.0396
32.7323	247		32.7323	239		32.7323	172		32.7347	396.212			32.7347	40299		32.7347	-6976.57		32.7347	1088.21	152.195	-172.851	-482.114		32.7347	655.037	118.543	13.3141	-52.373
32.7454	238		32.7454	211		32.7454	208		32.7478	404.612			32.7478	39299		32.7478	-7243.24		32.7478	1082.21	164.195	-159.351	-489.614		32.7478	663.37	120.543	12.3141	-56.373
32.7586	236		32.7586	218		32.7586	206		32.761	401.012			32.761	44799		32.761	-9109.9		32.761	1103.21	170.195	-168.351	-467.114		32.761	643.37	118.543	-7.18591	-68.373
32.7717	234		32.7717	260		32.7717	215		32.7741	398.312			32.7741	39049		32.7741	-6576.57		32.7741	1091.21	180.695	-144.351	-491.114		32.7741	623.37	120.543	3.81409	-44.373
32.7848	216		32.7848	232		32.7848	197		32.7872	396.512			32.7872	41049		32.7872	-10176.6		32.7872	1091.21	165.695	-187.851	-501.614		32.7872	645.037	127.543	2.81409	-49.373
32.798	205		32.798	266		32.798	210		32.8004	403.412			32.8004	39549		32.8004	-7509.9		32.8004	1094.21	140.195	-168.351	-452.114		32.8004	646.703	117.043	-0.68591	-64.0396
32.8111	226		32.8111	216		32.8111	202		32.8135	398.012			32.8135	40549		32.8135	-8309.9		32.8135	1073.21	162.695	-165.351	-474.614		32.8135	631.703	128.043	-1.68591	-56.0396
32.8242	200		32.8242	221		32.8242	205		32.8266	392.312			32.8266	45049		32.8266	-8043.24		32.8266	1034.21	147.695	-142.851	-495.614		32.8266	655.037	104.043	9.81409	-58.7063
32.8374	214		32.8374	220		32.8374	193		32.8398	401.012			32.8398	41049		32.8398	-6709.9		32.8398	1073.21	164.195	-160.851	-500.114		32.8398	623.37	138.043	12.3141	-54.373
32.8505	242		32.8505	230		32.8505	201		32.8529	390.212			32.8529	42049		32.8529	-7643.24		32.8529	1094.21	159.695	-153.351	-494.114		32.8529	648.37	109.543	9.31409	-59.373
32.8636	241		32.8636	216		32.8636	178		32.866	392.612			32.866	43299		32.866	-3376.57		32.866	1085.21	149.195	-142.851	-494.114		32.866	645.037	122.043	1.81409	-52.373
32.8768	207		32.8768	270		32.8768	181		32.8792	398.012			32.8792	42549		32.8792	-9643.24		32.8792	1130.21	156.695	-123.351	-465.614		32.8792	641.703	99.0433	-1.68591	-65.373
32.8899	215		32.8899	210		32.8899	165		32.8923	394.412			32.8923	45549		32.8923	-4576.57		32.8923	1085.21	165.695	-175.851	-486.614		32.8923	645.037	107.043	4.31409	-47.7063
32.903	207		32.903	230		32.903	193		32.9054	393.512			32.9054	42549		32.9054	-4576.57		32.9054	1118.21	135.695	-112.851	-461.114		32.9054	661.703	93.5433	18.3141	-59.373
32.9162	220		32.9162	216		32.9162	224		32.9186	393.812			32.9186	40049		32.9186	-2709.9		32.9186	1097.21	156.695	-147.351	-474.614		32.9186	676.703	114.543	9.31409	-55.373
32.9293	202		32.9293	227		32.9293	201		32.9317	390.812			32.9317	38799		32.9317	-10976.6		32.9317	1115.21	176.195	-174.351	-519.614		32.9317	625.037	128.543	0.81409	-59.0396
32.9424	201		32.9424	238		32.9424	195		32.9448	397.112			32.9448	41299		32.9448	-9909.9		32.9448	1055.21	152.195	-162.351	-461.114		32.9448	653.37	118.043	-2.18591	-56.373
32.9555	215		32.9555	246		32.9555	181		32.9579	390.212			32.9579	44049		32.9579	-6709.9		32.9579	1109.21	158.195	-127.851	-476.114		32.9579	641.703	111.043	10.3141	-57.373
32.9687	206		32.9687	243		32.9687	219		32.9711	393.812			32.9711	37049		32.9711	-9643.24		32.9711	1076.21	177.695	-150.351	-459.614		32.9711	650.037	121.543	-1.68591	-58.373
32.9818	209		32.9818	205		32.9818	206		32.9842	385.412			32.9842	42049		32.9842	-7243.24		32.9842	1100.21	126.695	-150.351	-519.614		32.9842	650.037	115.543	-2.18591	-58.7063
32.9949	176		32.9949	232		32.9949	183		32.9973	387.812			32.9973	43549		32.9973	-3243.24		32.9973	1055.21	161.195	-159.351	-525.614		32.9973	656.703	128.543	-2.18591	-58.373
33.0081	209		33.0081	198		33.0081	183		33.0105	389.912			33.0105	42799		33.0105	-8176.57		33.0105	1097.21	168.695	-156.351	-486.614		33.0105	646.703	109.043	-4.18591	-56.373
33.0212	198		33.0212	195		33.0212	207		33.0236	386.012			33.0236	41049		33.0236	-11509.9		33.0236	1088.21	191.195	-145.851	-482.114		33.0236	663.37	114.543	8.31409	-60.373
33.0343	180		33.0343	205		33.0343	204		33.0367	395.312			33.0367	42299		33.0367	-5776.57		33.0367	1076.21	144.695	-162.351	-479.114		33.0367	640.037	113.543	12.8141	-50.373
33.0474	192		33.0474	196		33.0474	183		33.0498	395.912			33.0498	39299		33.0498	-7376.57		33.0498	1097.21	164.195	-154.851	-485.114		33.0498	663.37	112.543	21.8141	-63.0396
33.0606	192		33.0606	218		33.0606	190		33.063	390.812			33.063	41549		33.063	-5909.9		33.063	1055.21	153.695	-177.351	-458.114		33.063	660.037	108.043	12.3141	-56.0396
33.0737	197		33.0737	224		33.0737	180		33.0761	386.312			33.0761	39549		33.0761	-6309.9		33.0761	1091.21	164.195	-210.351	-486.614		33.0761	648.37	115.543	-7.68591	-58.0396
33.0868	183		33.0868	228		33.0868	177		33.0892	389.312			33.0892	42299		33.0892	-5909.9		33.0892	1076.21	168.695	-141.351	-483.614		33.0892	621.703	116.043	3.81409	-64.373
33.1	230		33.1	197		33.1	192		33.1024	388.412			33.1024	35049		33.1024	-7109.9		33.1024	1106.21	138.695	-162.351	-513.614		33.1024	645.037	98.0433	8.31409	-61.373
33.1131	215		33.1131	196		33.1131	194		33.1155	383.012			33.1155	39549		33.1155	-7376.57		33.1155	1055.21	170.195	-174.351	-480.614		33.1155	630.037	113.043	6.81409	-62.373
33.1262	194		33.1262	182		33.1262	202		33.1286	385.412			33.1286	41549		33.1286	-9109.9		33.1286	1124.21	158.195	-144.351	-510.614		33.1286	651.703	120.043	6.81409	-59.7063
33.1394	171		33.1394	211		33.1394	172		33.1418	386.612			33.1418	44299		33.1418	-5643.24		33.1418	1064.21	144.695	-132.351	-467.114		33.1418	658.37	113.543	3.31409	-66.373
33.1525	185		33.1525	182		33.1525	211		33.1549	392.012			33.1549	39799		33.1549	-10309.9		33.1549	1079.21	138.695	-142.851	-513.614		33.1549	633.37	117.043	11.3141	-58.373
33.1656	220		33.1656	202		33.1656	175		33.168	381.812			33.168	44799		33.168	-9376.57		33.168	1058.21	137.195	-151.851	-500.114		33.168	650.037	107.543	6.81409	-52.7063
33.1788	188		33.1788	208		33.1788	164		33.1812	392.012			33.1812	41299		33.1812	-7376.57		33.1812	1064.21	168.695	-183.351	-501.614		33.1812	650.037	113.543	-0.68591	-62.7063
33.1919	205		33.1919	199		33.1919	166		33.1943	384.812			33.1943	44799		33.1943	-7243.24		33.1943	1082.21	141.695	-169.851	-476.114		33.1943	646.703	100.543	3.81409	-64.0396
33.205	187		33.205	204		33.205	161		33.2074	386.912			33.2074	46049		33.2074	-7509.9		33.2074	1067.21	173.195	-174.351	-512.114		33.2074	656.703	112.043	14.8141	-66.0396
33.2181	198		33.2181	194		33.2181	167		33.2205	380.912			33.2205	40799		33.2205	-6576.57		33.2205	1067.21	168.695	-148.851	-500.114		33.2205	650.037	108.543	14.3141	-61.7063
33.2313	196		33.2313	182		33.2313	180		33.2337	387.812			33.2337	42799		33.2337	-5776.57		33.2337	1118.21	159.695	-153.351	-479.114		33.2337	666.703	113.043	-9.68591	-59.0396
33.2444	188		33.2444	190		33.2444	177		33.2468	384.212			33.2468	44049		33.2468	-5109.9		33.2468	1094.21	156.695	-147.351	-503.114		33.2468	636.703	105.043	6.81409	-57.373
33.2575	199		33.2575	207		33.2575	179		33.2599	381.512			33.2599	40549		33.2599	-7243.24		33.2599	1091.21	156.695	-187.851	-501.614		33.2599	653.37	101.043	-4.18591	-59.0396
33.2707	225		33.2707	228		33.2707	197		33.2731	381.812			33.2731	40299		33.2731	-3243.24		33.2731	1094.21	134.195	-150.351	-497.114		33.2731	646.703	119.543	9.81409	-58.373
33.2838	200		33.2838	231		33.2838	166		33.2862	382.712			33.2862	38049		33.2862	-8176.57		33.2862	1106.21	179.195	-148.851	-507.614		33.2862	640.037	105.543	10.8141	-59.0396
33.2969	207		33.2969	191		33.2969	194		33.2993	384.812			33.2993	39049		33.2993	-5776.57		33.2993	1076.21	188.195	-151.851	-482.114		33.2993	635.037	104.543	3.31409	-62.373
33.31	196		33.31	185		33.31	190		33.3124	378.812			33.3124	37549		33.3124	-8576.57		33.3124	1094.21	128.195	-141.351	-509.114		33.3124	638.37	105.543	10.8141	-69.0396
33.3232	177		33.3232	204		33.3232	177		33.3256	378.512			33.3256	40549		33.3256	-5509.9		33.3256	1064.21	161.195	-169.851	-515.114		33.3256	651.703	98.0433	3.31409	-67.373
33.3363	197		33.3363	183		33.3363	159		33.3387	384.812			33.3387	38049		33.3387	-10309.9		33.3387	1106.21	138.695	-151.851	-482.114		33.3387	638.37	103.043	-9.68591	-66.7063
33.3494	191		33.3494	191		33.3494	185		33.3518	379.112			33.3518	44049		33.3518	-8309.9		33.3518	1100.21	164.195	-177.351	-473.114		33.3518	663.37	113.543	15.3141	-67.7063
33.3626	209		33.3626	202		33.3626	165		33.365	385.712			33.365	41299		33.365	-4709.9		33.365	1094.21	180.695	-157.851	-507.614		33.365	663.37	102.043	4.31409	-68.373
33.3757	188		33.3757	202		33.3757	175		33.3781	387.512			33.3781	40299		33.3781	-9909.9		33.3781	1124.21	122.195	-142.851	-489.614		33.3781	636.703	115.543	-6.18591	-68.0396
33.3888	187		33.3888	227		33.3888	198		33.3912	380.612			33.3912	42049		33.3912	-9643.24		33.3912	1088.21	176.195	-111.351	-543.614		33.3912	646.703	110.543	7.31409	-60.373
33.402	182		33.402	203		33.402	180		33.4044	380.312			33.4044	44799		33.4044	-12176.6		33.4044	1076.21	168.695	-141.351	-501.614		33.4044	680.037	115.043	-0.68591	-66.373
33.4151	225		33.4151	191		33.4151	154		33.4175	386.012			33.4175	43049		33.4175	-8176.57		33.4175	1088.21	162.695	-171.351	-531.614		33.4175	623.37	98.0433	-2.18591	-67.0396
33.4282	222		33.4282	200		33.4282	186		33.4306	387.512			33.4306	41549		33.4306	-6176.57		33.4306	1109.21	176.195	-171.351	-486.614		33.4306	643.37	107.543	6.31409	-68.373
33.4414	190		33.4414	192		33.4414	169		33.4438	380.312			33.4438	41049		33.4438	-10043.2		33.4438	1076.21	156.695	-189.351	-495.614		33.4438	633.37	108.043	-5.68591	-66.0396
33.4545	182		33.4545	192		33.4545	179		33.4569	372.812			33.4569	42549		33.4569	-6843.24		33.4569	1055.21	123.695	-130.851	-492.614		33.4569	621.703	107.043	0.31409	-63.7063
33.4676	216		33.4676	187		33.4676	161		33.47	385.412			33.47	43299		33.47	-8843.24		33.47	1112.21	150.695	-150.351	-489.614		33.47	643.37	115.043	1.31409	-69.0396
33.4808	207		33.4808	194		33.4808	172		33.4832	383.912			33.4832	37799		33.4832	-7776.57		33.4832	1106.21	149.195	-129.351	-446.114		33.4832	673.37	119.043	2.81409	-59.7063
33.4939	189		33.4939	194		33.4939	138		33.4963	385.712			33.4963	45799		33.4963	-8176.57		33.4963	1109.21	120.695	-162.351	-474.614		33.4963	638.37	118.543	-5.68591	-70.7063
33.507	190		33.507	209		33.507	183		33.5094	389.912			33.5094	40549		33.5094	-9109.9		33.5094	1070.21	152.195	-168.351	-497.114		33.5094	638.37	104.543	-4.68591	-67.373
33.5201	195		33.5201	171		33.5201	170		33.5225	382.412			33.5225	40049		33.5225	-6043.24		33.5225	1085.21	141.695	-169.851	-491.114		33.5225	611.703	110.543	2.81409	-69.0396
33.5333	195		33.5333	200		33.5333	179		33.5357	386.912			33.5357	44799		33.5357	-11109.9		33.5357	1082.21	156.695	-162.351	-491.114		33.5357	650.037	103.543	9.31409	-65.373
33.5464	192		33.5464	198		33.5464	179		33.5488	380.312			33.5488	42549		33.5488	-6443.24		33.5488	1079.21	168.695	-154.851	-468.614		33.5488	646.703	105.543	11.3141	-59.0396
33.5595	185		33.5595	210		33.5595	177		33.5619	381.512			33.5619	41549		33.5619	-9109.9		33.5619	1073.21	132.695	-160.851	-473.114		33.5619	633.37	113.043	-8.18591	-65.0396
33.5727	212		33.5727	203		33.5727	169		33.5751	386.312			33.5751	41799		33.5751	-8176.57		33.5751	1073.21	158.195	-106.851	-507.614		33.5751	631.703	106.543	-6.18591	-68.373
33.5858	182		33.5858	188		33.5858	167		33.5882	383.012			33.5882	43299		33.5882	-8843.24		33.5882	1061.21	165.695	-145.851	-467.114		33.5882	660.037	112.043	2.81409	-70.7063
33.5989	199		33.5989	192		33.5989	159		33.6013	383.612			33.6013	45549		33.6013	-5776.57		33.6013	1085.21	149.195	-184.851	-474.614		33.6013	626.703	99.0433	19.8141	-57.7063
33.6121	200		33.6121	178		33.6121	188		33.6144	381.212			33.6144	39799		33.6144	-11509.9		33.6144	1079.21	162.695	-162.351	-462.614		33.6144	643.37	111.543	-6.68591	-69.0396
33.6252	185		33.6252	191		33.6252	180		33.6276	385.712			33.6276	41799		33.6276	-7776.57		33.6276	1097.21	150.695	-115.851	-510.614		33.6276	631.703	112.043	19.8141	-67.0396
33.6383	180		33.6383	209		33.6383	166		33.6407	374.612			33.6407	42299		33.6407	-8176.57		33.6407	1073.21	128.195	-133.851	-494.114		33.6407	640.037	98.5433	7.81409	-65.7063
33.6514	164		33.6514	187		33.6514	171		33.6538	383.012			33.6538	39299		33.6538	-8576.57		33.6538	1064.21	141.695	-156.351	-486.614		33.6538	660.037	110.043	-2.18591	-51.0396
33.6646	180		33.6646	212		33.6646	181		33.667	386.312			33.667	44049		33.667	-7109.9		33.667	1073.21	167.195	-153.351	-501.614		33.667	628.37	127.043	-2.18591	-62.7063
33.6777	175		33.6777	204		33.6777	155		33.6801	378.512			33.6801	42549		33.6801	-9909.9		33.6801	1046.21	135.695	-94.8514	-522.614		33.6801	626.703	104.543	12.8141	-68.7063
33.6908	193		33.6908	180		33.6908	171		33.6932	383.312			33.6932	38799		33.6932	-6576.57		33.6932	1070.21	152.195	-144.351	-429.614		33.6932	633.37	102.043	4.31409	-71.0396
33.704	201		33.704	194		33.704	142		33.7064	390.812			33.7064	45299		33.7064	-10043.2		33.7064	1085.21	192.695	-166.851	-494.114		33.7064	635.037	95.0433	10.3141	-68.7063
33.7171	191		33.7171	177		33.7171	164		33.7195	384.812			33.7195	41549		33.7195	-8843.24		33.7195	1031.21	125.195	-115.851	-489.614		33.7195	646.703	113.043	9.81409	-61.7063
33.7302	159		33.7302	196		33.7302	173		33.7326	382.412			33.7326	42049		33.7326	-7376.57		33.7326	1058.21	137.195	-189.351	-510.614		33.7326	633.37	117.043	-7.68591	-64.7063
33.7433	203		33.7433	214		33.7433	187		33.7458	377.912			33.7458	38799		33.7458	-8576.57		33.7458	1076.21	174.695	-168.351	-455.114		33.7458	628.37	99.5433	2.31409	-64.7063
33.7565	179		33.7565	175		33.7565	159		33.7589	392.312			33.7589	39799		33.7589	-10843.2		33.7589	1082.21	140.195	-133.851	-456.614		33.7589	640.037	104.543	1.31409	-62.373
33.7696	196		33.7696	163		33.7696	179		33.772	380.912			33.772	38799		33.772	-9243.24		33.772	1100.21	150.695	-138.351	-486.614		33.772	648.37	99.5433	2.81409	-64.7063
33.7827	190		33.7827	175		33.7827	167		33.7851	382.412			33.7851	45049		33.7851	-8976.57		33.7851	1088.21	152.195	-150.351	-492.614		33.7851	631.703	104.543	2.81409	-67.0396
33.7959	199		33.7959	185		33.7959	201		33.7983	385.412			33.7983	44049		33.7983	-6176.57		33.7983	1094.21	147.695	-151.851	-509.114		33.7983	678.37	110.043	-17.1859	-61.7063
33.809	179		33.809	178		33.809	171		33.8114	376.412			33.8114	39549		33.8114	-10043.2		33.8114	1082.21	153.695	-165.351	-471.614		33.8114	646.703	102.043	-2.18591	-69.7063
33.8221	186		33.8221	192		33.8221	172		33.8245	382.112			33.8245	41299		33.8245	-4843.24		33.8245	1064.21	153.695	-141.351	-480.614		33.8245	643.37	105.043	21.3141	-67.373
33.8353	187		33.8353	193		33.8353	151		33.8377	387.812			33.8377	39549		33.8377	-8176.57		33.8377	1076.21	174.695	-201.351	-501.614		33.8377	631.703	107.543	10.3141	-72.0396
33.8484	163		33.8484	201		33.8484	171		33.8508	393.512			33.8508	41799		33.8508	-8043.24		33.8508	1085.21	155.195	-136.851	-458.114		33.8508	665.037	105.543	-9.18591	-75.373
33.8615	176		33.8615	182		33.8615	166		33.8639	382.112			33.8639	42299		33.8639	-12976.6		33.8639	1127.21	159.695	-181.851	-506.114		33.8639	636.703	107.043	-6.18591	-59.7063
33.8747	228		33.8747	181		33.8747	153		33.8771	381.512			33.8771	40799		33.8771	-12976.6		33.8771	1085.21	147.695	-171.351	-500.114		33.8771	623.37	100.043	2.31409	-64.0396
33.8878	202		33.8878	195		33.8878	172		33.8902	379.712			33.8902	38799		33.8902	-8976.57		33.8902	1094.21	155.195	-153.351	-471.614		33.8902	676.703	90.5433	-4.68591	-68.7063
33.9009	197		33.9009	185		33.9009	161		33.9033	378.812			33.9033	43049		33.9033	-7243.24		33.9033	1073.21	167.195	-174.351	-519.614		33.9033	641.703	85.0433	3.31409	-58.7063
33.9141	185		33.9141	215		33.9141	187		33.9164	382.112			33.9164	38049		33.9164	-10576.6		33.9164	1100.21	137.195	-204.351	-512.114		33.9164	651.703	105.543	5.31409	-69.7063
33.9272	199		33.9272	175		33.9272	173		33.9296	382.712			33.9296	39799		33.9296	-8176.57		33.9296	1070.21	170.195	-153.351	-473.114		33.9296	660.037	121.543	-9.68591	-64.7063
33.9403	190		33.9403	190		33.9403	160		33.9427	381.212			33.9427	39549		33.9427	-8309.9		33.9427	1088.21	141.695	-124.851	-500.114		33.9427	645.037	116.543	-3.18591	-71.373
33.9534	169		33.9534	210		33.9534	178		33.9558	386.012			33.9558	40549		33.9558	-10443.2		33.9558	1097.21	120.695	-126.351	-491.114		33.9558	638.37	101.543	10.8141	-68.7063
33.9666	183		33.9666	203		33.9666	178		33.969	391.712			33.969	39049		33.969	-9376.57		33.969	1088.21	156.695	-127.851	-488.114		33.969	626.703	99.0433	2.81409	-74.373
33.9797	193		33.9797	222		33.9797	178		33.9821	386.012			33.9821	40549		33.9821	-7909.9		33.9821	1073.21	141.695	-171.351	-483.614		33.9821	653.37	102.043	-13.1859	-66.373
33.9928	185		33.9928	190		33.9928	160		33.9952	378.212			33.9952	44049		33.9952	-10309.9		33.9952	1076.21	164.195	-172.851	-488.114		33.9952	625.037	106.543	6.81409	-68.0396
34.006	197		34.006	187		34.006	205		34.0084	385.112			34.0084	45299		34.0084	-7909.9		34.0084	1112.21	153.695	-117.351	-506.114		34.0084	631.703	96.5433	-4.68591	-67.0396
34.0191	167		34.0191	189		34.0191	183		34.0215	383.912			34.0215	46299		34.0215	-10443.2		34.0215	1079.21	147.695	-147.351	-486.614		34.0215	636.703	103.543	-2.18591	-73.373
34.0322	183		34.0322	194		34.0322	178		34.0346	385.112			34.0346	40799		34.0346	-9776.57		34.0346	1079.21	158.195	-163.851	-488.114		34.0346	648.37	97.0433	-2.68591	-70.373
34.0453	174		34.0453	183		34.0453	168		34.0478	390.812			34.0478	37049		34.0478	-10309.9		34.0478	1124.21	156.695	-147.351	-486.614		34.0478	641.703	105.043	2.31409	-71.373
34.0585	204		34.0585	178		34.0585	155		34.0609	378.512			34.0609	41299		34.0609	-9376.57		34.0609	1136.21	155.195	-166.851	-494.114		34.0609	656.703	106.043	-12.1859	-76.373
34.0716	181		34.0716	178		34.0716	164		34.074	376.412			34.074	44549		34.074	-6576.57		34.074	1097.21	159.695	-126.351	-441.614		34.074	635.037	92.5433	6.31409	-63.7063
34.0847	171		34.0847	205		34.0847	193		34.0871	377.012			34.0871	41549		34.0871	-8176.57		34.0871	1076.21	153.695	-144.351	-498.614		34.0871	650.037	102.043	-5.18591	-71.373
34.0979	205		34.0979	180		34.0979	163		34.1003	377.612			34.1003	41049		34.1003	-12443.2		34.1003	1088.21	137.195	-139.851	-462.614		34.1003	638.37	109.043	-3.18591	-67.7063
34.111	203		34.111	202		34.111	167		34.1134	375.812			34.1134	40049		34.1134	-7643.24		34.1134	1091.21	150.695	-84.3514	-504.614		34.1134	655.037	100.543	5.81409	-60.373
34.1241	210		34.1241	213		34.1241	187		34.1265	379.712			34.1265	41299		34.1265	-6309.9		34.1265	1079.21	152.195	-151.851	-498.614		34.1265	663.37	83.0433	4.31409	-73.373
34.1373	187		34.1373	163		34.1373	181		34.1397	388.712			34.1397	41049		34.1397	-10176.6		34.1397	1124.21	135.695	-157.851	-498.614		34.1397	630.037	99.5433	-3.68591	-59.0396
34.1504	163		34.1504	166		34.1504	184		34.1528	370.112			34.1528	36049		34.1528	-9243.24		34.1528	1091.21	150.695	-165.351	-498.614		34.1528	635.037	94.5433	-0.68591	-63.0396
34.1635	159		34.1635	188		34.1635	162		34.1659	375.212			34.1659	40799		34.1659	-8576.57		34.1659	1073.21	150.695	-171.351	-474.614		34.1659	646.703	90.0433	1.81409	-61.7063
34.1767	191		34.1767	183		34.1767	169		34.179	379.112			34.179	40549		34.179	-8976.57		34.179	1055.21	170.195	-181.851	-485.114		34.179	640.037	99.0433	3.31409	-62.0396
34.1898	179		34.1898	195		34.1898	150		34.1922	367.712			34.1922	43549		34.1922	-10176.6		34.1922	1100.21	129.695	-127.851	-458.114		34.1922	646.703	101.043	6.81409	-64.373
34.2029	177		34.2029	184		34.2029	177		34.2053	377.312			34.2053	34549		34.2053	-12176.6		34.2053	1079.21	155.195	-190.851	-500.114		34.2053	638.37	103.543	-0.68591	-69.7063
34.216	174		34.216	194		34.216	170		34.2184	374.312			34.2184	39799		34.2184	-12843.2		34.2184	1076.21	137.195	-162.351	-483.614		34.2184	653.37	107.043	-9.68591	-63.0396
34.2292	169		34.2292	171		34.2292	142		34.2316	371.312			34.2316	42299		34.2316	-9776.57		34.2316	1082.21	150.695	-159.351	-461.114		34.2316	631.703	109.543	4.81409	-79.7063
34.2423	167		34.2423	166		34.2423	151		34.2447	369.812			34.2447	36799		34.2447	-8843.24		34.2447	1070.21	168.695	-114.351	-516.614		34.2447	665.037	95.5433	-9.68591	-50.0396
34.2554	187		34.2554	168		34.2554	148		34.2578	371.612			34.2578	44049		34.2578	-9109.9		34.2578	1109.21	141.695	-120.351	-473.114		34.2578	661.703	107.543	4.31409	-61.0396
34.2686	180		34.2686	192		34.2686	156		34.271	377.012			34.271	40799		34.271	-8176.57		34.271	1097.21	119.195	-145.851	-512.114		34.271	661.703	110.043	-2.68591	-76.0396
34.2817	156		34.2817	167		34.2817	164		34.2841	371.312			34.2841	39299		34.2841	-10576.6		34.2841	1076.21	156.695	-165.351	-480.614		34.2841	633.37	108.543	0.81409	-69.373
34.2948	153		34.2948	179		34.2948	162		34.2972	371.612			34.2972	38549		34.2972	-5509.9		34.2972	1070.21	152.195	-130.851	-489.614		34.2972	661.703	105.043	-3.18591	-61.0396
34.308	150		34.308	162		34.308	130		34.3104	375.512			34.3104	44299		34.3104	-8709.9		34.3104	1079.21	135.695	-129.351	-489.614		34.3104	640.037	113.543	0.81409	-58.7063
34.3211	168		34.3211	196		34.3211	173		34.3235	366.812			34.3235	40299		34.3235	-11643.2		34.3235	1052.21	158.195	-148.851	-509.114		34.3235	633.37	88.0433	-9.68591	-71.0396
34.3342	178		34.3342	179		34.3342	171		34.3366	371.612			34.3366	42549		34.3366	-8576.57		34.3366	1055.21	164.195	-165.351	-503.114		34.3366	621.703	102.543	2.81409	-71.0396
34.3473	166		34.3473	174		34.3473	166		34.3498	367.412			34.3498	44299		34.3498	-10576.6		34.3498	1058.21	156.695	-129.351	-455.114		34.3498	636.703	113.543	-2.18591	-63.0396
34.3605	180		34.3605	167		34.3605	176		34.3629	373.712			34.3629	44549		34.3629	-9643.24		34.3629	1061.21	150.695	-103.851	-489.614		34.3629	618.37	91.5433	-6.68591	-67.7063
34.3736	166		34.3736	163		34.3736	146		34.376	371.312			34.376	39799		34.376	-9643.24		34.376	1067.21	141.695	-172.851	-459.614		34.376	633.37	91.5433	-4.18591	-67.0396
34.3867	174		34.3867	173		34.3867	142		34.3891	370.112			34.3891	42049		34.3891	-10576.6		34.3891	1043.21	153.695	-156.351	-491.114		34.3891	660.037	95.0433	-9.68591	-73.7063
34.3999	178		34.3999	174		34.3999	177		34.4023	375.212			34.4023	42549		34.4023	-9643.24		34.4023	1046.21	167.195	-148.851	-476.114		34.4023	635.037	87.0433	-6.68591	-65.0396
34.413	172		34.413	178		34.413	153		34.4154	368.912			34.4154	40799		34.4154	-8976.57		34.4154	1055.21	138.695	-136.851	-497.114		34.4154	643.37	97.5433	8.81409	-73.7063
34.4261	158		34.4261	211		34.4261	168		34.4285	377.612			34.4285	43299		34.4285	-5909.9		34.4285	1088.21	179.195	-111.351	-479.114		34.4285	638.37	98.5433	-11.1859	-65.0396
34.4393	159		34.4393	170		34.4393	144		34.4417	368.012			34.4417	45049		34.4417	-13509.9		34.4417	1088.21	149.195	-192.351	-491.114		34.4417	621.703	96.5433	3.31409	-73.7063
34.4524	175		34.4524	148		34.4524	137		34.4548	372.212			34.4548	41049		34.4548	-12309.9		34.4548	1106.21	162.695	-132.351	-506.114		34.4548	616.703	97.5433	10.3141	-63.0396
34.4655	151		34.4655	166		34.4655	141		34.4679	374.912			34.4679	39549		34.4679	-7643.24		34.4679	1094.21	156.695	-147.351	-483.614		34.4679	640.037	96.0433	-7.18591	-63.373
34.4787	184		34.4787	169		34.4787	153		34.4811	365.912			34.4811	41799		34.4811	-6709.9		34.4811	1103.21	180.695	-115.851	-456.614		34.4811	625.037	90.0433	7.31409	-68.0396
34.4918	178		34.4918	177		34.4918	165		34.4942	368.312			34.4942	41049		34.4942	-8309.9		34.4942	1034.21	176.195	-160.851	-480.614		34.4942	643.37	104.043	-5.18591	-69.7063
34.5049	177		34.5049	158		34.5049	135		34.5073	368.612			34.5073	38299		34.5073	-11109.9		34.5073	1070.21	161.195	-142.851	-470.114		34.5073	650.037	86.5433	3.31409	-64.7063
34.518	164		34.518	162		34.518	158		34.5204	366.212			34.5204	39049		34.5204	-10843.2		34.5204	1058.21	170.195	-154.851	-477.614		34.5204	636.703	91.5433	7.81409	-72.373
34.5312	173		34.5312	166		34.5312	152		34.5336	368.612			34.5336	40549		34.5336	-10309.9		34.5336	1070.21	164.195	-139.851	-500.114		34.5336	650.037	92.0433	-17.1859	-68.0396
34.5443	186		34.5443	151		34.5443	157		34.5467	368.312			34.5467	40049		34.5467	-9376.57		34.5467	1082.21	185.195	-193.851	-494.114		34.5467	620.037	100.543	4.81409	-70.373
34.5574	149		34.5574	175		34.5574	162		34.5598	371.012			34.5598	41799		34.5598	-9909.9		34.5598	1052.21	164.195	-120.351	-458.114		34.5598	636.703	98.5433	4.81409	-69.0396
34.5706	171		34.5706	141		34.5706	166		34.573	374.012			34.573	41049		34.573	-10309.9		34.573	1067.21	149.195	-138.351	-506.114		34.573	623.37	83.5433	-5.18591	-69.7063
34.5837	170		34.5837	148		34.5837	144		34.5861	366.212			34.5861	42049		34.5861	-9109.9		34.5861	1064.21	147.695	-135.351	-446.114		34.5861	646.703	105.043	2.31409	-72.7063
34.5968	159		34.5968	153		34.5968	167		34.5992	363.512			34.5992	39549		34.5992	-6976.57		34.5992	1109.21	137.195	-133.851	-507.614		34.5992	628.37	97.5433	-4.18591	-70.373
34.6099	152		34.6099	167		34.6099	153		34.6123	369.212			34.6123	42299		34.6123	-8843.24		34.6123	1082.21	158.195	-160.851	-489.614		34.6123	641.703	96.5433	-11.6859	-76.0396
34.6231	140		34.6231	140		34.6231	152		34.6255	372.212			34.6255	41049		34.6255	-9909.9		34.6255	1076.21	155.195	-154.851	-503.114		34.6255	641.703	92.0433	9.31409	-72.7063
34.6362	168		34.6362	180		34.6362	155		34.6386	368.012			34.6386	41299		34.6386	-10709.9		34.6386	1079.21	152.195	-180.351	-461.114		34.6386	625.037	92.5433	-3.68591	-70.373
34.6493	179		34.6493	179		34.6493	150		34.6517	367.412			34.6517	39549		34.6517	-11243.2		34.6517	1073.21	143.195	-115.851	-455.114		34.6517	626.703	99.0433	-14.6859	-67.0396
34.6625	190		34.6625	174		34.6625	140		34.6649	365.612			34.6649	43799		34.6649	-9643.24		34.6649	1094.21	135.695	-103.851	-485.114		34.6649	630.037	96.5433	-9.68591	-71.373
34.6756	136		34.6756	180		34.6756	142		34.678	366.212			34.678	37049		34.678	-9376.57		34.678	1085.21	170.195	-87.3514	-489.614		34.678	623.37	97.5433	-9.18591	-59.373
34.6887	146		34.6887	153		34.6887	166		34.6911	373.112			34.6911	40299		34.6911	-9109.9		34.6911	1070.21	147.695	-135.351	-485.114		34.6911	633.37	92.0433	1.81409	-66.7063
34.7019	163		34.7019	160		34.7019	169		34.7043	368.312			34.7043	40049		34.7043	-7109.9		34.7043	1055.21	107.195	-142.851	-453.614		34.7043	636.703	82.5433	0.81409	-59.7063
34.715	167		34.715	181		34.715	160		34.7174	366.212			34.7174	43799		34.7174	-9776.57		34.7174	1079.21	161.195	-142.851	-438.614		34.7174	638.37	93.0433	-10.6859	-70.0396
34.7281	172		34.7281	171		34.7281	165		34.7305	366.812			34.7305	42799		34.7305	-10709.9		34.7305	1055.21	162.695	-123.351	-483.614		34.7305	635.037	102.043	-9.18591	-66.373
34.7413	147		34.7413	152		34.7413	128		34.7437	370.712			34.7437	42799		34.7437	-7909.9		34.7437	1052.21	146.195	-142.851	-509.114		34.7437	628.37	94.0433	-11.1859	-74.373
34.7544	176		34.7544	159		34.7544	157		34.7568	360.512			34.7568	44049		34.7568	-11243.2		34.7568	1106.21	144.695	-126.351	-494.114		34.7568	645.037	122.543	-0.68591	-72.373
34.7675	175		34.7675	150		34.7675	156		34.7699	371.612			34.7699	41049		34.7699	-9776.57		34.7699	1058.21	140.195	-129.351	-453.614		34.7699	663.37	105.043	-5.68591	-66.7063
34.7807	158		34.7807	135		34.7807	132		34.7831	362.012			34.7831	44549		34.7831	-7509.9		34.7831	1094.21	141.695	-153.351	-473.114		34.7831	616.703	102.543	-11.6859	-64.373
34.7938	171		34.7938	180		34.7938	149		34.7962	364.412			34.7962	42299		34.7962	-10043.2		34.7962	1067.21	156.695	-145.851	-513.614		34.7962	653.37	105.543	-15.6859	-71.373
34.8069	171		34.8069	135		34.8069	153		34.8093	367.112			34.8093	40549		34.8093	-9243.24		34.8093	1091.21	149.195	-139.851	-486.614		34.8093	635.037	84.0433	-22.6859	-71.373
34.82	139		34.82	153		34.82	137		34.8224	362.912			34.8224	40549		34.8224	-13909.9		34.8224	1109.21	186.695	-163.851	-459.614		34.8224	623.37	98.0433	-11.6859	-64.7063
34.8332	171		34.8332	142		34.8332	155		34.8356	362.012			34.8356	41299		34.8356	-8976.57		34.8356	1091.21	159.695	-112.851	-498.614		34.8356	618.37	87.5433	-7.68591	-67.7063
34.8463	140		34.8463	155		34.8463	144		34.8487	362.312			34.8487	39049		34.8487	-14043.2		34.8487	1070.21	152.195	-150.351	-489.614		34.8487	646.703	90.0433	-6.18591	-65.7063
34.8594	153		34.8594	159		34.8594	165		34.8618	367.412			34.8618	42549		34.8618	-10176.6		34.8618	1067.21	144.695	-129.351	-440.114		34.8618	628.37	91.5433	-5.18591	-74.373
34.8726	160		34.8726	147		34.8726	147		34.875	361.112			34.875	40049		34.875	-5643.24		34.875	1064.21	162.695	-129.351	-476.114		34.875	651.703	88.5433	-30.6859	-68.373
34.8857	161		34.8857	151		34.8857	135		34.8881	373.112			34.8881	41549		34.8881	-8176.57		34.8881	1088.21	144.695	-90.3514	-461.114		34.8881	641.703	93.0433	-12.6859	-66.7063
34.8988	191		34.8988	171		34.8988	145		34.9012	359.312			34.9012	41049		34.9012	-9776.57		34.9012	1067.21	170.195	-133.851	-483.614		34.9012	641.703	89.5433	0.31409	-71.0396
34.9119	157		34.9119	135		34.9119	161		34.9143	364.712			34.9143	42549		34.9143	-11376.6		34.9143	1106.21	165.695	-145.851	-489.614		34.9143	638.37	92.0433	-11.1859	-71.373
34.9251	139		34.9251	189		34.9251	152		34.9275	368.012			34.9275	42549		34.9275	-9243.24		34.9275	1049.21	150.695	-126.351	-489.614		34.9275	623.37	102.043	-0.18591	-72.373
34.9382	162		34.9382	154		34.9382	154		34.9406	362.012			34.9406	44299		34.9406	-9776.57		34.9406	1046.21	185.195	-129.351	-450.614		34.9406	636.703	88.0433	-8.18591	-77.373
34.9513	182		34.9513	163		34.9513	173		34.9537	366.212			34.9537	42549		34.9537	-10443.2		34.9537	1079.21	164.195	-175.851	-474.614		34.9537	648.37	103.543	-6.18591	-60.373
34.9645	183		34.9645	164		34.9645	147		34.9669	365.912			34.9669	43299		34.9669	-12843.2		34.9669	1079.21	158.195	-156.351	-491.114		34.9669	618.37	96.5433	-4.68591	-62.7063
34.9776	180		34.9776	138		34.9776	154		34.98	370.112			34.98	41799		34.98	-9243.24		34.98	1055.21	156.695	-127.851	-504.614		34.98	653.37	88.5433	3.31409	-69.373
34.9907	156		34.9907	144		34.9907	171		34.9931	363.812			34.9931	42549		34.9931	-9376.57		34.9931	1082.21	165.695	-136.851	-479.114		34.9931	646.703	96.0433	-8.68591	-72.0396
35.0039	142		35.0039	153		35.0039	143		35.0063	365.612			35.0063	42049		35.0063	-10576.6		35.0063	1079.21	141.695	-112.851	-501.614		35.0063	621.703	92.5433	-8.68591	-66.373
35.017	134		35.017	154		35.017	172		35.0194	363.212			35.0194	41299		35.0194	-10443.2		35.0194	1049.21	192.695	-123.351	-483.614		35.0194	656.703	92.5433	-8.18591	-66.373
35.0301	157		35.0301	163		35.0301	146		35.0325	365.012			35.0325	43549		35.0325	-9243.24		35.0325	1088.21	162.695	-129.351	-489.614		35.0325	635.037	87.0433	-23.1859	-74.373
35.0433	155		35.0433	148		35.0433	135		35.0457	362.912			35.0457	40299		35.0457	-10576.6		35.0457	1070.21	182.195	-105.351	-512.114		35.0457	626.703	97.0433	-9.18591	-60.373
35.0564	148		35.0564	161		35.0564	142		35.0588	360.512			35.0588	43299		35.0588	-10309.9		35.0588	1085.21	174.695	-145.851	-494.114		35.0588	643.37	79.5433	-11.1859	-70.7063
35.0695	162		35.0695	141		35.0695	130		35.0719	362.012			35.0719	40799		35.0719	-5776.57		35.0719	1040.21	143.195	-121.851	-474.614		35.0719	631.703	99.0433	-13.6859	-64.373
35.0826	158		35.0826	146		35.0826	157		35.085	366.212			35.085	35799		35.085	-9376.57		35.085	1067.21	158.195	-135.351	-468.614		35.085	628.37	94.0433	-8.68591	-69.373
35.0958	151		35.0958	171		35.0958	128		35.0982	365.312			35.0982	45049		35.0982	-13376.6		35.0982	1082.21	150.695	-175.851	-485.114		35.0982	610.037	86.0433	-13.1859	-65.373
35.1089	182		35.1089	161		35.1089	160		35.1113	365.012			35.1113	41299		35.1113	-10843.2		35.1113	1091.21	147.695	-132.351	-476.114		35.1113	636.703	92.5433	-8.68591	-63.373
35.122	158		35.122	152		35.122	150		35.1244	358.412			35.1244	38049		35.1244	-10976.6		35.1244	1073.21	150.695	-88.8514	-498.614		35.1244	621.703	105.543	-7.68591	-67.373
35.1352	158		35.1352	157		35.1352	151		35.1376	363.812			35.1376	38799		35.1376	-8443.24		35.1376	1076.21	165.695	-133.851	-477.614		35.1376	640.037	96.0433	3.31409	-72.0396
35.1483	138		35.1483	140		35.1483	169		35.1507	362.912			35.1507	45549		35.1507	-10176.6		35.1507	1064.21	143.195	-157.851	-492.614		35.1507	640.037	98.0433	-8.18591	-64.373
35.1614	150		35.1614	150		35.1614	146		35.1638	362.612			35.1638	37549		35.1638	-10576.6		35.1638	1073.21	156.695	-60.3514	-461.114		35.1638	648.37	97.5433	-5.68591	-62.373
35.1746	142		35.1746	143		35.1746	144		35.1769	356.912			35.1769	39299		35.1769	-10309.9		35.1769	1061.21	161.195	-159.351	-501.614		35.1769	641.703	101.543	0.31409	-71.7063
35.1877	158		35.1877	153		35.1877	131		35.1901	363.812			35.1901	42049		35.1901	-8843.24		35.1901	1079.21	147.695	-132.351	-446.114		35.1901	620.037	100.543	-3.68591	-67.373
35.2008	137		35.2008	149		35.2008	129		35.2032	357.212			35.2032	43049		35.2032	-12443.2		35.2032	1067.21	147.695	-142.851	-494.114		35.2032	621.703	85.5433	-10.1859	-66.0396
35.2139	145		35.2139	138		35.2139	151		35.2163	363.512			35.2163	44049		35.2163	-9376.57		35.2163	1094.21	176.195	-129.351	-486.614		35.2163	655.037	86.5433	-14.1859	-70.373
35.2271	160		35.2271	159		35.2271	160		35.2295	363.212			35.2295	37799		35.2295	-12709.9		35.2295	1052.21	164.195	-135.351	-527.114		35.2295	613.37	89.0433	-15.1859	-72.0396
35.2402	153		35.2402	132		35.2402	137		35.2426	360.512			35.2426	38299		35.2426	-10443.2		35.2426	1067.21	141.695	-93.3514	-477.614		35.2426	640.037	103.543	-12.6859	-68.373
35.2533	159		35.2533	141		35.2533	157		35.2557	359.012			35.2557	42549		35.2557	-8176.57		35.2557	1076.21	153.695	-145.851	-488.114		35.2557	633.37	88.0433	-27.6859	-57.7063
35.2665	142		35.2665	159		35.2665	165		35.2689	363.512			35.2689	42549		35.2689	-8976.57		35.2689	1055.21	140.195	-139.851	-455.114		35.2689	625.037	92.0433	-5.18591	-76.373
35.2796	164		35.2796	115		35.2796	132		35.282	365.012			35.282	41049		35.282	-9509.9		35.282	1067.21	167.195	-102.351	-497.114		35.282	661.703	93.5433	-5.68591	-64.7063
35.2927	142		35.2927	174		35.2927	141		35.2951	368.912			35.2951	45549		35.2951	-8709.9		35.2951	1067.21	168.695	-136.851	-480.614		35.2951	636.703	96.5433	-10.6859	-68.7063
35.3059	158		35.3059	167		35.3059	130		35.3083	359.012			35.3083	38049		35.3083	-12309.9		35.3083	1049.21	143.195	-120.351	-467.114		35.3083	641.703	100.043	-13.1859	-65.7063
35.319	166		35.319	163		35.319	144		35.3214	361.112			35.3214	42049		35.3214	-9109.9		35.3214	1046.21	122.195	-115.851	-473.114		35.3214	631.703	96.5433	0.31409	-60.0396
35.3321	167		35.3321	161		35.3321	149		35.3345	359.012			35.3345	39299		35.3345	-10443.2		35.3345	1073.21	185.195	-144.351	-467.114		35.3345	628.37	95.0433	-7.68591	-60.7063
35.3453	129		35.3453	163		35.3453	150		35.3477	361.412			35.3477	44049		35.3477	-8576.57		35.3477	1049.21	168.695	-120.351	-482.114		35.3477	651.703	93.5433	-8.18591	-76.7063
35.3584	145		35.3584	157		35.3584	140		35.3608	361.412			35.3608	41549		35.3608	-9776.57		35.3608	1043.21	174.695	-106.851	-495.614		35.3608	628.37	100.043	-13.1859	-63.373
35.3715	145		35.3715	144		35.3715	139		35.3739	359.012			35.3739	39049		35.3739	-9376.57		35.3739	1025.21	141.695	-160.851	-455.114		35.3739	635.037	106.543	-15.6859	-65.373
35.3846	126		35.3846	136		35.3846	128		35.387	357.212			35.387	41799		35.387	-10709.9		35.387	1058.21	134.195	-120.351	-464.114		35.387	635.037	78.0433	-10.6859	-62.373
35.3978	139		35.3978	156		35.3978	143		35.4002	359.012			35.4002	42549		35.4002	-9909.9		35.4002	1082.21	144.695	-138.351	-464.114		35.4002	630.037	94.5433	-0.68591	-63.373
35.4109	154		35.4109	154		35.4109	140		35.4133	361.712			35.4133	45549		35.4133	-11243.2		35.4133	1067.21	158.195	-111.351	-486.614		35.4133	638.37	106.543	-14.1859	-66.0396
35.424	168		35.424	144		35.424	157		35.4264	366.212			35.4264	41549		35.4264	-9643.24		35.4264	1076.21	135.695	-79.8514	-486.614		35.4264	626.703	93.0433	-6.18591	-67.373
35.4372	161		35.4372	151		35.4372	146		35.4396	365.612			35.4396	44049		35.4396	-7776.57		35.4396	1070.21	134.195	-114.351	-497.114		35.4396	643.37	91.5433	-5.18591	-66.373
35.4503	136		35.4503	152		35.4503	129		35.4527	359.312			35.4527	42049		35.4527	-10443.2		35.4527	1070.21	150.695	-135.351	-479.114		35.4527	615.037	82.5433	-12.6859	-68.373
35.4634	164		35.4634	125		35.4634	141		35.4658	357.212			35.4658	44799		35.4658	-8976.57		35.4658	1055.21	164.195	-130.851	-465.614		35.4658	620.037	107.043	-13.1859	-70.7063
35.4766	150		35.4766	140		35.4766	143		35.4789	363.812			35.4789	41549		35.4789	-9109.9		35.4789	1088.21	128.195	-90.3514	-488.114		35.4789	641.703	105.543	4.31409	-70.7063
35.4897	129		35.4897	148		35.4897	132		35.4921	358.412			35.4921	38299		35.4921	-12043.2		35.4921	1055.21	150.695	-150.351	-474.614		35.4921	631.703	92.5433	-6.18591	-69.373
35.5028	148		35.5028	140		35.5028	143		35.5052	359.612			35.5052	45299		35.5052	-10309.9		35.5052	1064.21	140.195	-88.8514	-488.114		35.5052	625.037	97.0433	-7.18591	-71.7063
35.5159	135		35.5159	148		35.5159	132		35.5183	357.512			35.5183	40049		35.5183	-8043.24		35.5183	1088.21	129.695	-70.8514	-480.614		35.5183	646.703	94.5433	-11.1859	-63.0396
35.5291	144		35.5291	157		35.5291	116		35.5315	364.112			35.5315	45799		35.5315	-12443.2		35.5315	1094.21	135.695	-120.351	-438.614		35.5315	643.37	80.5433	1.31409	-66.0396
35.5422	138		35.5422	154		35.5422	134		35.5446	358.412			35.5446	41299		35.5446	-10709.9		35.5446	1118.21	143.195	-82.8514	-474.614		35.5446	641.703	100.543	-5.18591	-66.0396
35.5553	151		35.5553	125		35.5553	150		35.5577	356.312			35.5577	45299		35.5577	-10976.6		35.5577	1073.21	126.695	-130.851	-477.614		35.5577	650.037	93.5433	7.81409	-63.0396
35.5685	155		35.5685	139		35.5685	157		35.5709	359.912			35.5709	40299		35.5709	-6843.24		35.5709	1085.21	153.695	-76.8514	-492.614		35.5709	626.703	102.543	-18.1859	-63.0396
35.5816	141		35.5816	151		35.5816	133		35.584	366.512			35.584	38799		35.584	-10043.2		35.584	1070.21	158.195	-87.3514	-474.614		35.584	620.037	93.0433	-8.18591	-68.7063
35.5947	134		35.5947	156		35.5947	152		35.5971	360.212			35.5971	41549		35.5971	-11376.6		35.5971	1070.21	168.695	-37.8514	-494.114		35.5971	641.703	88.5433	-13.6859	-64.373
35.6078	151		35.6078	154		35.6078	147		35.6103	357.512			35.6103	38299		35.6103	-10309.9		35.6103	1076.21	168.695	-64.8514	-464.114		35.6103	623.37	96.0433	-16.6859	-68.373
35.621	146		35.621	132		35.621	131		35.6234	358.412			35.6234	43299		35.6234	-8976.57		35.6234	1085.21	155.195	-85.8514	-428.114		35.6234	633.37	90.0433	-16.6859	-63.7063
35.6341	155		35.6341	174		35.6341	127		35.6365	361.112			35.6365	43799		35.6365	-8576.57		35.6365	1091.21	167.195	-121.851	-492.614		35.6365	628.37	97.5433	-7.68591	-61.373
35.6472	136		35.6472	144		35.6472	116		35.6496	364.412			35.6496	42799		35.6496	-9509.9		35.6496	1073.21	176.195	-117.351	-458.114		35.6496	625.037	90.5433	-8.18591	-54.0396
35.6604	145		35.6604	147		35.6604	150		35.6628	361.112			35.6628	41049		35.6628	-7376.57		35.6628	1073.21	161.195	-82.8514	-500.114		35.6628	646.703	98.0433	-1.68591	-60.0396
35.6735	148		35.6735	145		35.6735	124		35.6759	362.012			35.6759	42299		35.6759	-10309.9		35.6759	1049.21	149.195	-132.351	-488.114		35.6759	633.37	93.0433	-0.68591	-66.7063
35.6866	143		35.6866	141		35.6866	154		35.689	359.012			35.689	42799		35.689	-8976.57		35.689	1076.21	173.195	-114.351	-485.114		35.689	621.703	98.5433	-15.6859	-59.373
35.6998	135		35.6998	139		35.6998	140		35.7022	363.512			35.7022	42799		35.7022	-8709.9		35.7022	1064.21	144.695	-126.351	-438.614		35.7022	616.703	91.5433	-6.68591	-69.0396
35.7129	162		35.7129	160		35.7129	144		35.7153	361.412			35.7153	38549		35.7153	-9776.57		35.7153	1097.21	135.695	-112.851	-495.614		35.7153	621.703	93.5433	-2.18591	-62.373
35.726	151		35.726	140		35.726	139		35.7284	356.312			35.7284	41299		35.7284	-8576.57		35.7284	1079.21	155.195	-106.851	-485.114		35.7284	626.703	107.543	-13.1859	-69.0396
35.7392	139		35.7392	133		35.7392	123		35.7416	356.012			35.7416	42799		35.7416	-7376.57		35.7416	1049.21	158.195	-91.8514	-483.614		35.7416	643.37	94.0433	-7.18591	-58.0396
35.7523	118		35.7523	126		35.7523	139		35.7547	359.312			35.7547	42549		35.7547	-7376.57		35.7547	1043.21	168.695	-127.851	-443.114		35.7547	626.703	97.5433	0.81409	-61.0396
35.7654	153		35.7654	128		35.7654	139		35.7678	361.112			35.7678	42299		35.7678	-10043.2		35.7678	1085.21	182.195	-66.3514	-443.114		35.7678	623.37	94.0433	-7.18591	-65.373
35.7786	137		35.7786	157		35.7786	137		35.7809	362.912			35.7809	41049		35.7809	-13776.6		35.7809	1076.21	192.695	-114.351	-446.114		35.7809	638.37	101.543	-8.68591	-62.7063
35.7917	159		35.7917	140		35.7917	124		35.7941	354.812			35.7941	44549		35.7941	-9509.9		35.7941	1067.21	129.695	-76.8514	-477.614		35.7941	621.703	88.5433	-3.68591	-71.7063
35.8048	139		35.8048	134		35.8048	147		35.8072	364.412			35.8072	43299		35.8072	-8576.57		35.8072	1058.21	159.695	-87.3514	-435.614		35.8072	643.37	81.0433	-3.68591	-68.0396
35.8179	148		35.8179	121		35.8179	154		35.8203	361.412			35.8203	41549		35.8203	-10043.2		35.8203	1046.21	123.695	-67.8514	-459.614		35.8203	638.37	86.0433	-2.18591	-68.373
35.8311	149		35.8311	139		35.8311	154		35.8335	359.912			35.8335	41549		35.8335	-9909.9		35.8335	1073.21	161.195	-63.3514	-453.614		35.8335	636.703	106.043	2.81409	-62.373
35.8442	155		35.8442	130		35.8442	144		35.8466	359.012			35.8466	37549		35.8466	-10576.6		35.8466	1073.21	144.695	-114.351	-495.614		35.8466	645.037	94.0433	-33.1859	-61.0396
35.8573	159		35.8573	154		35.8573	120		35.8597	361.412			35.8597	39049		35.8597	-10176.6		35.8597	1073.21	150.695	-88.8514	-441.614		35.8597	621.703	90.5433	5.81409	-64.7063
35.8705	128		35.8705	145		35.8705	146		35.8729	356.912			35.8729	45049		35.8729	-8709.9		35.8729	1046.21	140.195	-76.8514	-479.114		35.8729	618.37	91.5433	3.31409	-59.0396
35.8836	131		35.8836	125		35.8836	134		35.886	357.512			35.886	45799		35.886	-9643.24		35.886	1079.21	171.695	-61.8514	-452.114		35.886	631.703	85.0433	-11.6859	-62.7063
35.8967	125		35.8967	150		35.8967	116		35.8991	360.812			35.8991	43049		35.8991	-11776.6		35.8991	1070.21	158.195	-63.3514	-455.114		35.8991	645.037	102.543	-8.68591	-69.0396
35.9098	130		35.9098	147		35.9098	126		35.9123	356.612			35.9123	42049		35.9123	-9109.9		35.9123	1043.21	141.695	-91.8514	-443.114		35.9123	650.037	91.5433	-1.68591	-64.373
35.923	137		35.923	161		35.923	140		35.9254	355.112			35.9254	41049		35.9254	-8843.24		35.9254	1043.21	158.195	-51.3514	-464.114		35.9254	625.037	94.0433	-2.18591	-63.7063
35.9361	158		35.9361	178		35.9361	109		35.9385	361.412			35.9385	42299		35.9385	-6976.57		35.9385	1100.21	131.195	-64.8514	-429.614		35.9385	633.37	97.0433	-9.68591	-63.0396
35.9492	117		35.9492	146		35.9492	141		35.9516	363.512			35.9516	41299		35.9516	-7243.24		35.9516	1052.21	155.195	-67.8514	-447.614		35.9516	636.703	78.5433	-17.6859	-60.373
35.9624	142		35.9624	161		35.9624	137		35.9648	358.412			35.9648	42299		35.9648	-10709.9		35.9648	1061.21	150.695	-88.8514	-453.614		35.9648	618.37	94.5433	-7.18591	-68.373
35.9755	156		35.9755	138		35.9755	120		35.9779	359.912			35.9779	45049		35.9779	-6976.57		35.9779	1043.21	104.195	-108.351	-440.114		35.9779	625.037	100.543	1.31409	-59.373
35.9886	141		35.9886	125		35.9886	126		35.991	354.512			35.991	41799		35.991	-8309.9		35.991	1082.21	146.195	-120.351	-432.614		35.991	606.703	89.5433	-6.68591	-67.0396
36.0018	133		36.0018	134		36.0018	132		36.0042	359.612			36.0042	41299		36.0042	-10309.9		36.0042	1058.21	158.195	-88.8514	-444.614		36.0042	623.37	98.5433	1.31409	-66.0396
36.0149	134		36.0149	120		36.0149	121		36.0173	359.912			36.0173	42299		36.0173	-11376.6		36.0173	1088.21	132.695	-34.8514	-461.114		36.0173	626.703	96.0433	-1.18591	-62.0396
36.028	167		36.028	138		36.028	136		36.0304	360.212			36.0304	39049		36.0304	-11376.6		36.0304	1052.21	164.195	-69.3514	-438.614		36.0304	628.37	82.5433	0.31409	-65.7063
36.0412	129		36.0412	133		36.0412	149		36.0436	360.812			36.0436	38799		36.0436	-9109.9		36.0436	1049.21	164.195	-0.35144	-443.114		36.0436	630.037	95.0433	2.31409	-64.0396
36.0543	122		36.0543	148		36.0543	146		36.0567	359.912			36.0567	38549		36.0567	-6709.9		36.0567	1088.21	135.695	-58.8514	-444.614		36.0567	626.703	90.0433	18.8141	-60.0396
36.0674	146		36.0674	133		36.0674	152		36.0698	356.012			36.0698	42049		36.0698	-8043.24		36.0698	1058.21	150.695	-42.3514	-425.114		36.0698	626.703	92.0433	1.81409	-63.373
36.0805	126		36.0805	117		36.0805	140		36.0829	360.512			36.0829	39799		36.0829	-8976.57		36.0829	1106.21	177.695	-37.8514	-450.614		36.0829	616.703	109.043	-5.68591	-63.7063
36.0937	121		36.0937	158		36.0937	123		36.0961	357.512			36.0961	41049		36.0961	-6576.57		36.0961	1049.21	158.195	-57.3514	-435.614		36.0961	636.703	90.5433	6.81409	-63.7063
36.1068	142		36.1068	121		36.1068	136		36.1092	360.512			36.1092	41799		36.1092	-12976.6		36.1092	1028.21	176.195	-34.8514	-413.114		36.1092	636.703	96.5433	2.31409	-66.7063
36.1199	130		36.1199	145		36.1199	144		36.1223	357.512			36.1223	42299		36.1223	-8976.57		36.1223	1073.21	129.695	-31.8514	-453.614		36.1223	626.703	99.0433	1.81409	-53.0396
36.1331	123		36.1331	117		36.1331	116		36.1355	356.012			36.1355	43299		36.1355	-6309.9		36.1355	1067.21	129.695	-43.8514	-450.614		36.1355	631.703	101.043	-7.18591	-62.373
36.1462	127		36.1462	158		36.1462	128		36.1486	356.912			36.1486	46549		36.1486	-6443.24		36.1486	1118.21	155.195	-25.8514	-425.114		36.1486	621.703	91.5433	-6.18591	-60.373
36.1593	132		36.1593	130		36.1593	148		36.1617	356.612			36.1617	40049		36.1617	-7376.57		36.1617	1052.21	143.195	-52.8514	-434.114		36.1617	628.37	99.5433	-15.6859	-65.373
36.1725	143		36.1725	143		36.1725	145		36.1749	352.412			36.1749	39549		36.1749	-8976.57		36.1749	1055.21	143.195	-36.3514	-452.114		36.1749	626.703	108.543	-6.18591	-55.373
36.1856	121		36.1856	136		36.1856	130		36.188	359.012			36.188	39549		36.188	-6176.57		36.188	1055.21	173.195	-30.3514	-479.114		36.188	628.37	102.543	-3.18591	-59.373
36.1987	137		36.1987	134		36.1987	120		36.2011	357.212			36.2011	45049		36.2011	-7509.9		36.2011	1091.21	146.195	-25.8514	-440.114		36.2011	606.703	103.543	-9.68591	-65.373
36.2118	115		36.2118	137		36.2118	121		36.2142	358.112			36.2142	41049		36.2142	-8576.57		36.2142	1097.21	177.695	-22.8514	-461.114		36.2142	626.703	93.0433	-7.68591	-57.0396
36.225	153		36.225	129		36.225	122		36.2274	362.912			36.2274	40299		36.2274	-6843.24		36.2274	1100.21	150.695	-43.8514	-423.614		36.2274	625.037	101.543	10.8141	-57.7063
36.2381	128		36.2381	126		36.2381	135		36.2405	355.112			36.2405	46799		36.2405	-11376.6		36.2405	1070.21	143.195	-13.8514	-371.114		36.2405	608.37	103.543	4.81409	-64.0396
36.2512	125		36.2512	135		36.2512	146		36.2536	357.812			36.2536	43549		36.2536	-7243.24		36.2536	1097.21	135.695	-13.8514	-437.114		36.2536	630.037	90.0433	1.81409	-55.0396
36.2644	158		36.2644	146		36.2644	155		36.2668	358.412			36.2668	40799		36.2668	-11643.2		36.2668	1070.21	134.195	-25.8514	-455.114		36.2668	618.37	96.5433	14.8141	-52.7063
36.2775	150		36.2775	136		36.2775	149		36.2799	355.112			36.2799	46049		36.2799	-6709.9		36.2799	1064.21	147.695	-10.8514	-416.114		36.2799	630.037	96.5433	2.31409	-64.0396
36.2906	140		36.2906	130		36.2906	139		36.293	358.112			36.293	42299		36.293	-2709.9		36.293	1067.21	144.695	-24.3514	-401.114		36.293	633.37	111.543	-0.18591	-56.7063
36.3038	138		36.3038	138		36.3038	126		36.3062	359.612			36.3062	43549		36.3062	-8043.24		36.3062	1064.21	138.695	10.1486	-402.614		36.3062	641.703	112.543	9.81409	-66.373
36.3169	140		36.3169	144		36.3169	123		36.3193	355.112			36.3193	43049		36.3193	-6043.24		36.3193	1091.21	171.695	4.14856	-459.614		36.3193	615.037	102.543	7.31409	-55.373
36.33	116		36.33	138		36.33	122		36.3324	359.612			36.3324	46299		36.3324	-5776.57		36.3324	1058.21	164.195	-4.85144	-459.614		36.3324	633.37	102.543	2.31409	-54.7063
36.3432	145		36.3432	142		36.3432	143		36.3456	359.312			36.3456	41799		36.3456	-5109.9		36.3456	1076.21	141.695	37.1486	-419.114		36.3456	630.037	114.043	7.31409	-53.373
36.3563	152		36.3563	136		36.3563	124		36.3587	356.312			36.3587	45799		36.3587	-7776.57		36.3587	1076.21	147.695	-54.3514	-398.114		36.3587	645.037	112.543	7.81409	-56.0396
36.3694	139		36.3694	129		36.3694	130		36.3718	357.212			36.3718	40299		36.3718	-5509.9		36.3718	1064.21	152.195	-4.85144	-402.614		36.3718	640.037	106.543	2.31409	-61.373
36.3825	120		36.3825	126		36.3825	148		36.3849	359.312			36.3849	46299		36.3849	-9376.57		36.3849	1103.21	168.695	94.1486	-414.614		36.3849	636.703	112.043	12.8141	-51.373
36.3957	137		36.3957	139		36.3957	142		36.3981	357.812			36.3981	46299		36.3981	-10176.6		36.3981	1049.21	149.195	-15.3514	-387.614		36.3981	603.37	105.043	3.81409	-53.0396
36.4088	149		36.4088	139		36.4088	134		36.4112	356.612			36.4112	41799		36.4112	-9509.9		36.4112	1058.21	132.695	-6.35144	-396.614		36.4112	623.37	110.043	0.81409	-59.0396
36.4219	146		36.4219	145		36.4219	128		36.4243	354.812			36.4243	43799		36.4243	-4843.24		36.4243	1049.21	162.695	22.1486	-387.614		36.4243	640.037	100.043	2.81409	-56.0396
36.4351	104		36.4351	151		36.4351	132		36.4375	354.812			36.4375	47549		36.4375	-3509.9		36.4375	1034.21	170.195	73.1486	-386.114		36.4375	631.703	111.043	4.31409	-51.7063
36.4482	127		36.4482	151		36.4482	124		36.4506	359.612			36.4506	44299		36.4506	-5776.57		36.4506	1067.21	158.195	31.1486	-392.114		36.4506	628.37	109.543	1.81409	-50.0396
36.4613	113		36.4613	134		36.4613	159		36.4637	352.412			36.4637	39799		36.4637	-5243.24		36.4637	1097.21	138.695	8.64856	-407.114		36.4637	626.703	105.543	-3.68591	-51.7063
36.4744	126		36.4744	149		36.4744	131		36.4768	359.312			36.4768	45299		36.4768	-8176.57		36.4768	1046.21	161.195	43.1486	-392.114		36.4768	621.703	100.543	8.81409	-60.373
36.4876	129		36.4876	134		36.4876	137		36.49	359.312			36.49	41799		36.49	-6843.24		36.49	1097.21	159.695	-21.3514	-396.614		36.49	630.037	119.043	10.3141	-46.373
36.5007	139		36.5007	127		36.5007	122		36.5031	354.812			36.5031	45299		36.5031	-6443.24		36.5031	1070.21	162.695	13.1486	-408.614		36.5031	618.37	110.543	-3.68591	-49.373
36.5138	118		36.5138	132		36.5138	139		36.5162	359.012			36.5162	44049		36.5162	-3509.9		36.5162	1067.21	155.195	10.1486	-348.614		36.5162	628.37	107.043	12.3141	-50.373
36.527	118		36.527	137		36.527	113		36.5294	357.212			36.5294	43799		36.5294	-6709.9		36.5294	1028.21	174.695	31.1486	-422.114		36.5294	626.703	113.543	-1.18591	-58.0396
36.5401	120		36.5401	114		36.5401	120		36.5425	355.712			36.5425	45799		36.5425	-7643.24		36.5425	1049.21	156.695	40.1486	-351.614		36.5425	638.37	93.5433	15.8141	-45.7063
36.5532	149		36.5532	142		36.5532	117		36.5556	356.312			36.5556	47049		36.5556	-8309.9		36.5556	1043.21	141.695	29.6486	-368.114		36.5556	631.703	113.543	10.8141	-52.373
36.5664	135		36.5664	137		36.5664	124		36.5688	356.012			36.5688	47549		36.5688	-9243.24		36.5688	1124.21	165.695	-10.8514	-366.614		36.5688	640.037	97.5433	18.8141	-36.0396
36.5795	161		36.5795	139		36.5795	121		36.5819	356.912			36.5819	45799		36.5819	-9643.24		36.5819	1061.21	167.195	14.6486	-374.114		36.5819	633.37	116.043	22.3141	-45.0396
36.5926	130		36.5926	132		36.5926	131		36.595	360.812			36.595	43799		36.595	-4309.9		36.595	1082.21	168.695	37.1486	-348.614		36.595	630.037	90.0433	4.81409	-43.373
36.6058	125		36.6058	131		36.6058	115		36.6082	358.112			36.6082	43799		36.6082	-6976.57		36.6082	1061.21	173.195	-9.35144	-413.114		36.6082	628.37	101.043	33.8141	-42.7063
36.6189	149		36.6189	139		36.6189	143		36.6213	360.812			36.6213	44299		36.6213	-8043.24		36.6213	1088.21	182.195	19.1486	-387.614		36.6213	625.037	100.043	3.31409	-45.0396
36.632	144		36.632	137		36.632	131		36.6344	355.112			36.6344	44299		36.6344	-6709.9		36.6344	1073.21	182.195	-25.8514	-396.614		36.6344	625.037	93.0433	14.8141	-46.7063
36.6452	137		36.6452	133		36.6452	141		36.6476	358.412			36.6476	44549		36.6476	-7376.57		36.6476	1079.21	137.195	-22.8514	-345.614		36.6476	620.037	94.5433	15.3141	-45.7063
36.6583	142		36.6583	139		36.6583	137		36.6607	360.812			36.6607	41299		36.6607	-6843.24		36.6607	1124.21	161.195	34.1486	-399.614		36.6607	635.037	103.543	27.3141	-41.373
36.6714	137		36.6714	125		36.6714	109		36.6738	358.712			36.6738	40299		36.6738	-6443.24		36.6738	1043.21	182.195	-0.35144	-395.114		36.6738	616.703	95.0433	10.3141	-47.0396
36.6845	148		36.6845	141		36.6845	155		36.6869	359.912			36.6869	41049		36.6869	-5643.24		36.6869	1067.21	159.695	35.6486	-374.114		36.6869	621.703	99.5433	8.81409	-40.373
36.6977	139		36.6977	140		36.6977	121		36.7001	365.912			36.7001	41049		36.7001	-11509.9		36.7001	1046.21	138.695	19.1486	-396.614		36.7001	635.037	95.5433	0.31409	-56.7063
36.7108	136		36.7108	106		36.7108	126		36.7132	354.512			36.7132	42299		36.7132	-8576.57		36.7132	1052.21	158.195	-18.3514	-425.114		36.7132	618.37	92.5433	2.31409	-40.0396
36.7239	121		36.7239	145		36.7239	123		36.7263	353.912			36.7263	40049		36.7263	-9509.9		36.7263	1043.21	167.195	28.1486	-408.614		36.7263	625.037	97.0433	10.8141	-45.373
36.7371	153		36.7371	128		36.7371	125		36.7395	357.812			36.7395	44299		36.7395	-8576.57		36.7395	1085.21	191.195	-22.8514	-396.614		36.7395	628.37	97.5433	3.31409	-52.7063
36.7502	141		36.7502	132		36.7502	129		36.7526	353.612			36.7526	42799		36.7526	-8976.57		36.7526	1106.21	168.695	-82.8514	-402.614		36.7526	630.037	104.043	-0.18591	-36.7063
36.7633	141		36.7633	128		36.7633	147		36.7657	355.412			36.7657	41799		36.7657	-2576.57		36.7657	1094.21	164.195	-27.3514	-368.114		36.7657	641.703	96.0433	-2.68591	-49.0396
36.7764	116		36.7764	134		36.7764	132		36.7788	359.312			36.7788	42799		36.7788	-8176.57		36.7788	1049.21	182.195	-42.3514	-437.114		36.7788	618.37	94.5433	-0.68591	-41.7063
36.7896	145		36.7896	108		36.7896	136		36.792	357.512			36.792	40049		36.792	-9109.9		36.792	1073.21	180.695	-31.8514	-386.114		36.792	620.037	101.043	0.81409	-49.7063
36.8027	133		36.8027	117		36.8027	138		36.8051	358.412			36.8051	44049		36.8051	-7376.57		36.8051	1040.21	171.695	-7.85144	-413.114		36.8051	606.703	103.543	7.31409	-49.7063
36.8158	140		36.8158	130		36.8158	135		36.8182	355.712			36.8182	42799		36.8182	-5776.57		36.8182	1061.21	164.195	-43.8514	-410.114		36.8182	638.37	99.0433	12.8141	-48.7063
36.829	140		36.829	132		36.829	147		36.8314	361.412			36.8314	46299		36.8314	-9509.9		36.8314	1094.21	158.195	5.64856	-402.614		36.8314	638.37	110.543	19.8141	-44.7063
36.8421	125		36.8421	162		36.8421	122		36.8445	355.712			36.8445	45049		36.8445	-9776.57		36.8445	1061.21	156.695	-43.8514	-437.114		36.8445	633.37	107.043	-0.18591	-47.7063
36.8552	131		36.8552	111		36.8552	114		36.8576	355.712			36.8576	44799		36.8576	-10043.2		36.8576	1103.21	143.195	-72.3514	-408.614		36.8576	645.037	101.043	-6.18591	-53.7063
36.8684	152		36.8684	123		36.8684	122		36.8708	357.212			36.8708	40799		36.8708	-9243.24		36.8708	1067.21	150.695	-70.8514	-429.614		36.8708	641.703	97.0433	0.81409	-41.0396
36.8815	131		36.8815	120		36.8815	123		36.8839	358.112			36.8839	34549		36.8839	-9109.9		36.8839	1049.21	158.195	-76.8514	-422.114		36.8839	621.703	92.5433	1.31409	-51.0396
36.8946	124		36.8946	115		36.8946	120		36.897	357.812			36.897	41799		36.897	-6709.9		36.897	1073.21	158.195	-70.8514	-398.114		36.897	620.037	104.043	8.31409	-46.373
36.9078	117		36.9078	133		36.9078	115		36.9102	360.812			36.9102	44049		36.9102	-7376.57		36.9102	1085.21	158.195	-40.8514	-452.114		36.9102	638.37	93.5433	12.8141	-54.373
36.9209	140		36.9209	132		36.9209	126		36.9233	357.512			36.9233	40049		36.9233	-13643.2		36.9233	1076.21	153.695	-25.8514	-447.614		36.9233	618.37	97.5433	-9.68591	-42.7063
36.934	148		36.934	146		36.934	129		36.9364	363.812			36.9364	42549		36.9364	-11243.2		36.9364	1073.21	153.695	-34.8514	-437.114		36.9364	655.037	96.0433	0.31409	-59.0396
36.9471	112		36.9471	149		36.9471	115		36.9495	354.812			36.9495	44049		36.9495	-7776.57		36.9495	1100.21	156.695	-66.3514	-449.114		36.9495	636.703	99.0433	11.8141	-37.373
36.9603	120		36.9603	127		36.9603	143		36.9627	362.012			36.9627	40549		36.9627	-9376.57		36.9627	1070.21	143.195	-45.3514	-458.114		36.9627	611.703	89.5433	-4.68591	-53.0396
36.9734	143		36.9734	117		36.9734	119		36.9758	359.612			36.9758	43799		36.9758	-8443.24		36.9758	1052.21	170.195	-112.851	-446.114		36.9758	623.37	96.5433	5.31409	-57.0396
36.9865	114		36.9865	140		36.9865	126		36.9889	358.112			36.9889	43799		36.9889	-8443.24		36.9889	1046.21	164.195	-57.3514	-438.614		36.9889	633.37	105.543	-7.68591	-53.0396
36.9997	119		36.9997	142		36.9997	124		37.0021	358.412			37.0021	44549		37.0021	-9909.9		37.0021	1067.21	150.695	-45.3514	-411.614		37.0021	633.37	101.043	-8.18591	-58.7063
37.0128	126		37.0128	118		37.0128	120		37.0152	356.312			37.0152	43049		37.0152	-6443.24		37.0152	1088.21	158.195	-61.8514	-444.614		37.0152	626.703	91.0433	4.31409	-56.373
37.0259	129		37.0259	143		37.0259	135		37.0283	359.012			37.0283	44049		37.0283	-8443.24		37.0283	1061.21	129.695	-63.3514	-461.114		37.0283	641.703	79.5433	0.31409	-55.0396
37.0391	131		37.0391	126		37.0391	126		37.0414	356.612			37.0414	44299		37.0414	-7109.9		37.0414	1085.21	140.195	-67.8514	-431.114		37.0414	643.37	101.043	2.81409	-57.7063
37.0522	136		37.0522	114		37.0522	138		37.0546	354.812			37.0546	43549		37.0546	-10576.6		37.0546	1043.21	122.195	-40.8514	-443.114		37.0546	655.037	92.5433	3.31409	-61.373
37.0653	121		37.0653	141		37.0653	145		37.0677	351.812			37.0677	41799		37.0677	-10043.2		37.0677	1091.21	153.695	-0.35144	-384.614		37.0677	628.37	88.0433	5.81409	-58.373
37.0784	127		37.0784	107		37.0784	144		37.0808	352.412			37.0808	44299		37.0808	-9509.9		37.0808	1100.21	155.195	-57.3514	-458.114		37.0808	638.37	104.043	-11.1859	-56.373
37.0916	143		37.0916	123		37.0916	101		37.094	357.212			37.094	46049		37.094	-8443.24		37.094	1034.21	146.195	-90.3514	-446.114		37.094	611.703	95.0433	-2.18591	-50.0396
37.1047	121		37.1047	120		37.1047	120		37.1071	358.712			37.1071	46799		37.1071	-12443.2		37.1071	1079.21	152.195	-69.3514	-437.114		37.1071	625.037	94.0433	0.31409	-58.373
37.1178	142		37.1178	116		37.1178	143		37.1202	356.612			37.1202	45049		37.1202	-11109.9		37.1202	1061.21	152.195	-25.8514	-419.114		37.1202	621.703	98.5433	-1.18591	-59.373
37.131	138		37.131	164		37.131	144		37.1334	353.612			37.1334	42799		37.1334	-9109.9		37.1334	1064.21	156.695	-61.8514	-425.114		37.1334	633.37	89.0433	0.81409	-58.7063
37.1441	141		37.1441	152		37.1441	126		37.1465	356.912			37.1465	41299		37.1465	-8443.24		37.1465	1070.21	150.695	-67.8514	-431.114		37.1465	621.703	98.0433	11.8141	-60.0396
37.1572	113		37.1572	143		37.1572	141		37.1596	352.412			37.1596	41049		37.1596	-12176.6		37.1596	1079.21	135.695	-58.8514	-422.114		37.1596	623.37	106.543	14.8141	-54.373
37.1704	135		37.1704	99		37.1704	154		37.1728	355.712			37.1728	41799		37.1728	-8709.9		37.1728	1043.21	150.695	-43.8514	-453.614		37.1728	636.703	91.0433	-6.18591	-56.7063
37.1835	128		37.1835	128		37.1835	136		37.1859	357.212			37.1859	37799		37.1859	-10709.9		37.1859	1058.21	131.195	-63.3514	-446.114		37.1859	630.037	107.543	1.31409	-62.7063
37.1966	134		37.1966	140		37.1966	132		37.199	354.812			37.199	37299		37.199	-11909.9		37.199	1085.21	155.195	-37.8514	-429.614		37.199	618.37	106.543	-2.18591	-61.0396
37.2097	131		37.2097	128		37.2097	127		37.2122	356.612			37.2122	41549		37.2122	-10843.2		37.2122	1061.21	171.695	-75.3514	-440.114		37.2122	653.37	96.0433	-2.68591	-61.0396
37.2229	113		37.2229	115		37.2229	118		37.2253	358.412			37.2253	40549		37.2253	-12843.2		37.2253	1076.21	135.695	-10.8514	-444.614		37.2253	621.703	95.5433	2.31409	-51.0396
37.236	130		37.236	156		37.236	128		37.2384	359.312			37.2384	40549		37.2384	-9909.9		37.2384	1070.21	152.195	-46.8514	-479.114		37.2384	615.037	106.543	5.31409	-61.0396
37.2491	114		37.2491	132		37.2491	112		37.2515	359.312			37.2515	41799		37.2515	-8843.24		37.2515	1052.21	155.195	-45.3514	-434.114		37.2515	648.37	110.043	12.3141	-61.373
37.2623	134		37.2623	121		37.2623	117		37.2647	353.012			37.2647	44799		37.2647	-9109.9		37.2647	1058.21	150.695	-46.8514	-443.114		37.2647	636.703	94.5433	2.31409	-58.0396
37.2754	129		37.2754	110		37.2754	137		37.2778	353.612			37.2778	40799		37.2778	-7776.57		37.2778	1055.21	149.195	-60.3514	-459.614		37.2778	630.037	101.543	-5.68591	-64.0396
37.2885	137		37.2885	128		37.2885	142		37.2909	352.712			37.2909	41049		37.2909	-9909.9		37.2909	1076.21	159.695	-49.8514	-450.614		37.2909	641.703	91.5433	-13.1859	-60.373
37.3017	123		37.3017	138		37.3017	121		37.3041	352.412			37.3041	46549		37.3041	-9909.9		37.3041	1058.21	137.195	-69.3514	-443.114		37.3041	638.37	107.043	18.3141	-66.373
37.3148	119		37.3148	120		37.3148	130		37.3172	357.212			37.3172	38549		37.3172	-9909.9		37.3172	1079.21	159.695	-43.8514	-444.614		37.3172	618.37	113.543	5.81409	-57.7063
37.3279	145		37.3279	132		37.3279	133		37.3303	356.912			37.3303	46299		37.3303	-8443.24		37.3303	1064.21	183.695	-63.3514	-440.114		37.3303	620.037	105.543	-4.18591	-65.0396
37.3411	125		37.3411	130		37.3411	122		37.3434	355.712			37.3434	41299		37.3434	-6443.24		37.3434	1100.21	167.195	-55.8514	-444.614		37.3434	613.37	97.0433	-11.6859	-67.0396
37.3542	124		37.3542	152		37.3542	113		37.3566	355.112			37.3566	43049		37.3566	-8843.24		37.3566	1088.21	149.195	-55.8514	-443.114		37.3566	631.703	96.5433	7.81409	-64.373
37.3673	138		37.3673	138		37.3673	123		37.3697	353.912			37.3697	38549		37.3697	-11909.9		37.3697	1064.21	174.695	-24.3514	-464.114		37.3697	630.037	103.043	-5.68591	-59.373
37.3804	141		37.3804	121		37.3804	150		37.3828	356.012			37.3828	43049		37.3828	-9243.24		37.3828	1061.21	161.195	-39.3514	-441.614		37.3828	626.703	101.043	-0.18591	-69.373
37.3936	126		37.3936	136		37.3936	131		37.396	354.212			37.396	40549		37.396	-7776.57		37.396	1073.21	171.695	-34.8514	-437.114		37.396	628.37	107.043	-15.1859	-61.0396
37.4067	120		37.4067	125		37.4067	142		37.4091	354.512			37.4091	43299		37.4091	-10843.2		37.4091	1070.21	168.695	-22.8514	-447.614		37.4091	625.037	97.0433	5.81409	-58.7063
37.4198	121		37.4198	109		37.4198	132		37.4222	357.212			37.4222	38049		37.4222	-12576.6		37.4222	1079.21	165.695	-79.8514	-423.614		37.4222	623.37	91.0433	7.81409	-61.0396
37.433	135		37.433	108		37.433	109		37.4354	353.312			37.4354	43299		37.4354	-12043.2		37.4354	1079.21	161.195	-102.351	-435.614		37.4354	626.703	98.0433	-0.18591	-56.7063
37.4461	142		37.4461	122		37.4461	114		37.4485	352.112			37.4485	46049		37.4485	-9376.57		37.4485	1091.21	158.195	-67.8514	-450.614		37.4485	626.703	90.5433	-12.6859	-58.373
37.4592	175		37.4592	113		37.4592	128		37.4616	358.712			37.4616	44049		37.4616	-10043.2		37.4616	1070.21	141.695	-54.3514	-452.114		37.4616	631.703	90.5433	-16.1859	-69.373
37.4723	131		37.4723	148		37.4723	134		37.4748	352.112			37.4748	43049		37.4748	-7509.9		37.4748	1067.21	191.195	-13.8514	-431.114		37.4748	608.37	92.5433	3.31409	-66.373
37.4855	127		37.4855	137		37.4855	128		37.4879	357.812			37.4879	44299		37.4879	-3109.9		37.4879	1094.21	186.695	-61.8514	-459.614		37.4879	653.37	92.5433	0.81409	-69.373
37.4986	124		37.4986	149		37.4986	118		37.501	357.812			37.501	46799		37.501	-9509.9		37.501	1079.21	144.695	-90.3514	-423.614		37.501	635.037	103.543	-11.6859	-61.7063
37.5117	135		37.5117	107		37.5117	115		37.5142	355.112			37.5142	42049		37.5142	-5776.57		37.5142	1073.21	146.195	-66.3514	-432.614		37.5142	625.037	91.5433	4.31409	-69.373
37.5249	121		37.5249	130		37.5249	134		37.5273	351.812			37.5273	42299		37.5273	-8576.57		37.5273	1088.21	152.195	-51.3514	-432.614		37.5273	631.703	79.5433	-6.18591	-59.7063
37.538	124		37.538	146		37.538	144		37.5404	355.412			37.5404	43299		37.5404	-9109.9		37.5404	1043.21	147.695	-7.85144	-411.614		37.5404	628.37	108.043	8.31409	-66.0396
37.5511	147		37.5511	103		37.5511	129		37.5535	354.512			37.5535	40049		37.5535	-8709.9		37.5535	1088.21	164.195	-45.3514	-431.114		37.5535	611.703	100.543	-8.68591	-58.373
37.5643	129		37.5643	117		37.5643	116		37.5667	354.512			37.5667	41049		37.5667	-9509.9		37.5667	1067.21	134.195	-55.8514	-491.114		37.5667	623.37	96.0433	4.81409	-66.7063
37.5774	127		37.5774	116		37.5774	117		37.5798	355.412			37.5798	40799		37.5798	-11776.6		37.5798	1094.21	159.695	-19.8514	-432.614		37.5798	625.037	104.043	10.8141	-60.373
37.5905	134		37.5905	128		37.5905	121		37.5929	353.912			37.5929	43049		37.5929	-8709.9		37.5929	1043.21	150.695	-82.8514	-423.614		37.5929	626.703	95.5433	0.31409	-71.373
37.6037	124		37.6037	138		37.6037	124		37.6061	362.012			37.6061	43549		37.6061	-10576.6		37.6061	1049.21	144.695	-58.8514	-426.614		37.6061	610.037	106.543	0.31409	-66.7063
37.6168	117		37.6168	123		37.6168	122		37.6192	357.212			37.6192	45549		37.6192	-10576.6		37.6192	1055.21	174.695	-28.8514	-449.114		37.6192	640.037	94.0433	-9.18591	-61.0396
37.6299	139		37.6299	134		37.6299	127		37.6323	357.212			37.6323	39299		37.6323	-9643.24		37.6323	1073.21	159.695	-13.8514	-446.114		37.6323	615.037	103.043	1.81409	-67.373
37.6431	129		37.6431	136		37.6431	126		37.6454	357.512			37.6454	43049		37.6454	-8709.9		37.6454	1076.21	168.695	-51.3514	-417.614		37.6454	636.703	101.043	-3.18591	-67.7063
37.6562	137		37.6562	132		37.6562	122		37.6586	359.312			37.6586	40049		37.6586	-9109.9		37.6586	1058.21	168.695	-108.351	-447.614		37.6586	615.037	103.543	6.81409	-63.0396
37.6693	143		37.6693	104		37.6693	126		37.6717	358.412			37.6717	46549		37.6717	-9909.9		37.6717	1073.21	164.195	-46.8514	-450.614		37.6717	640.037	100.543	8.81409	-66.0396
37.6824	149		37.6824	129		37.6824	146		37.6848	354.512			37.6848	39299		37.6848	-9909.9		37.6848	1100.21	128.195	-79.8514	-474.614		37.6848	630.037	109.543	-7.18591	-66.373
37.6956	134		37.6956	115		37.6956	121		37.698	352.112			37.698	42299		37.698	-10043.2		37.698	1112.21	158.195	-73.8514	-405.614		37.698	638.37	116.043	-0.18591	-52.373
37.7087	123		37.7087	119		37.7087	145		37.7111	357.512			37.7111	44549		37.7111	-8443.24		37.7111	1085.21	168.695	-6.35144	-420.614		37.7111	620.037	92.5433	-3.68591	-69.373
37.7218	114		37.7218	130		37.7218	123		37.7242	358.712			37.7242	43799		37.7242	-7643.24		37.7242	1085.21	162.695	-36.3514	-411.614		37.7242	630.037	98.5433	-13.1859	-63.373
37.735	125		37.735	133		37.735	110		37.7374	355.112			37.7374	48049		37.7374	-8309.9		37.7374	1064.21	150.695	-45.3514	-405.614		37.7374	618.37	99.0433	-5.18591	-54.7063
37.7481	129		37.7481	117		37.7481	105		37.7505	353.012			37.7505	46299		37.7505	-11243.2		37.7505	1052.21	158.195	-37.8514	-489.614		37.7505	611.703	95.0433	-4.18591	-64.373
37.7612	139		37.7612	116		37.7612	120		37.7636	357.212			37.7636	45549		37.7636	-11643.2		37.7636	1067.21	140.195	-79.8514	-464.114		37.7636	610.037	94.0433	6.81409	-62.373
37.7743	144		37.7743	126		37.7743	117		37.7767	359.912			37.7767	43049		37.7767	-8976.57		37.7767	1088.21	180.695	-33.3514	-446.114		37.7767	621.703	102.543	6.31409	-64.7063
37.7875	132		37.7875	136		37.7875	120		37.7899	355.712			37.7899	44799		37.7899	-11509.9		37.7899	1052.21	165.695	-34.8514	-437.114		37.7899	616.703	104.543	-9.18591	-60.373
37.8006	135		37.8006	151		37.8006	153		37.803	354.812			37.803	43299		37.803	-10976.6		37.803	1064.21	149.195	-63.3514	-417.614		37.803	646.703	102.543	0.81409	-66.373
37.8137	123		37.8137	118		37.8137	125		37.8161	352.412			37.8161	41299		37.8161	-10709.9		37.8161	1115.21	155.195	-31.8514	-447.614		37.8161	625.037	106.043	5.31409	-63.0396
37.8269	114		37.8269	127		37.8269	120		37.8293	355.112			37.8293	43549		37.8293	-7776.57		37.8293	1088.21	165.695	-63.3514	-429.614		37.8293	626.703	100.543	-9.18591	-63.373
37.84	140		37.84	116		37.84	132		37.8424	355.712			37.8424	42799		37.8424	-10709.9		37.8424	1100.21	137.195	-43.8514	-440.114		37.8424	625.037	105.043	-9.68591	-61.7063
37.8531	133		37.8531	137		37.8531	137		37.8555	355.712			37.8555	43049		37.8555	-12309.9		37.8555	1088.21	156.695	-124.851	-404.114		37.8555	626.703	100.543	6.31409	-58.373
37.8663	108		37.8663	117		37.8663	133		37.8687	361.712			37.8687	39799		37.8687	-10309.9		37.8687	1097.21	159.695	-111.351	-467.114		37.8687	631.703	99.5433	-2.18591	-62.0396
37.8794	115		37.8794	144		37.8794	118		37.8818	356.312			37.8818	40549		37.8818	-6043.24		37.8818	1070.21	158.195	-55.8514	-486.614		37.8818	635.037	104.043	-6.68591	-69.7063
37.8925	143		37.8925	132		37.8925	108		37.8949	355.112			37.8949	41799		37.8949	-9643.24		37.8949	1070.21	176.195	-52.8514	-470.114		37.8949	646.703	93.0433	12.8141	-66.0396
37.9057	126		37.9057	125		37.9057	123		37.9081	355.412			37.9081	42549		37.9081	-7776.57		37.9081	1082.21	155.195	-51.3514	-455.114		37.9081	630.037	98.5433	-14.1859	-70.7063
37.9188	126		37.9188	124		37.9188	111		37.9212	355.712			37.9212	44049		37.9212	-9376.57		37.9212	1076.21	155.195	-61.8514	-405.614		37.9212	636.703	98.0433	2.81409	-63.373
37.9319	127		37.9319	111		37.9319	139		37.9343	355.112			37.9343	43049		37.9343	-13376.6		37.9343	1094.21	156.695	-102.351	-471.614		37.9343	623.37	93.5433	-8.68591	-65.7063
37.945	130		37.945	125		37.945	91		37.9474	359.612			37.9474	43799		37.9474	-7643.24		37.9474	1073.21	140.195	-82.8514	-449.114		37.9474	618.37	93.0433	2.81409	-53.7063
37.9582	132		37.9582	109		37.9582	126		37.9606	357.812			37.9606	41299		37.9606	-10176.6		37.9606	1061.21	149.195	-54.3514	-425.114		37.9606	631.703	96.5433	-5.18591	-64.7063
37.9713	132		37.9713	130		37.9713	109		37.9737	354.812			37.9737	41299		37.9737	-7243.24		37.9737	1100.21	164.195	-57.3514	-429.614		37.9737	641.703	93.0433	4.31409	-73.7063
37.9844	149		37.9844	124		37.9844	115		37.9868	355.112			37.9868	41799		37.9868	-11909.9		37.9868	1082.21	153.695	-66.3514	-455.114		37.9868	628.37	90.5433	-1.68591	-63.373
37.9976	129		37.9976	122		37.9976	110		38	357.812			38	40049		38	-10043.2		38	1073.21	185.195	-90.3514	-437.114		38	625.037	106.543	21.8141	-62.0396
38.0107	108		38.0107	132		38.0107	130		38.0131	359.912			38.0131	37049		38.0131	-10443.2		38.0131	1070.21	201.695	-88.8514	-471.614		38.0131	638.37	99.0433	2.31409	-63.0396
38.0238	127		38.0238	123		38.0238	105		38.0262	354.212			38.0262	39549		38.0262	-10976.6		38.0262	1034.21	138.695	-70.8514	-465.614		38.0262	628.37	90.0433	-2.68591	-54.7063
38.037	114		38.037	140		38.037	120		38.0394	356.012			38.0394	45799		38.0394	-12176.6		38.0394	1106.21	182.195	-106.851	-440.114		38.0394	630.037	100.543	7.81409	-70.373
38.0501	125		38.0501	142		38.0501	119		38.0525	356.612			38.0525	41799		38.0525	-12043.2		38.0525	1067.21	149.195	-94.8514	-450.614		38.0525	621.703	98.0433	0.31409	-61.373
38.0632	148		38.0632	143		38.0632	102		38.0656	360.212			38.0656	41049		38.0656	-10176.6		38.0656	1100.21	167.195	-15.3514	-453.614		38.0656	636.703	96.5433	9.81409	-64.0396
38.0763	123		38.0763	123		38.0763	131		38.0787	358.112			38.0787	42049		38.0787	-10309.9		38.0787	1052.21	152.195	-88.8514	-431.114		38.0787	625.037	102.043	-15.6859	-60.0396
38.0895	115		38.0895	155		38.0895	112		38.0919	359.612			38.0919	41799		38.0919	-8576.57		38.0919	1091.21	146.195	-54.3514	-407.114		38.0919	620.037	89.0433	-2.68591	-60.0396
38.1026	126		38.1026	135		38.1026	116		38.105	357.812			38.105	44799		38.105	-12176.6		38.105	1046.21	174.695	-79.8514	-452.114		38.105	638.37	94.0433	10.8141	-63.373
38.1157	127		38.1157	124		38.1157	120		38.1181	356.012			38.1181	42799		38.1181	-9776.57		38.1181	1061.21	194.195	-54.3514	-450.614		38.1181	633.37	92.5433	0.81409	-63.373
38.1289	131		38.1289	112		38.1289	129		38.1313	360.812			38.1313	43549		38.1313	-11243.2		38.1313	1067.21	158.195	-78.3514	-426.614		38.1313	623.37	95.5433	-4.18591	-64.373
38.142	122		38.142	139		38.142	121		38.1444	358.412			38.1444	45549		38.1444	-8709.9		38.1444	1070.21	156.695	-84.3514	-458.114		38.1444	621.703	106.543	-2.18591	-64.373
38.1551	142		38.1551	128		38.1551	128		38.1575	358.412			38.1575	37549		38.1575	-10309.9		38.1575	1100.21	150.695	-43.8514	-467.114		38.1575	623.37	87.5433	3.81409	-56.7063
38.1683	145		38.1683	136		38.1683	131		38.1707	353.312			38.1707	46549		38.1707	-8843.24		38.1707	1097.21	174.695	-42.3514	-438.614		38.1707	615.037	110.543	-17.1859	-63.0396
38.1814	124		38.1814	95		38.1814	109		38.1838	355.712			38.1838	43299		38.1838	-9643.24		38.1838	1049.21	183.695	-43.8514	-473.114		38.1838	626.703	106.543	-8.18591	-63.0396
38.1945	143		38.1945	104		38.1945	96		38.1969	358.412			38.1969	43799		38.1969	-7643.24		38.1969	1079.21	161.195	-66.3514	-405.614		38.1969	630.037	90.5433	-3.68591	-59.7063
38.2077	131		38.2077	144		38.2077	131		38.2101	357.212			38.2101	43049		38.2101	-12309.9		38.2101	1052.21	152.195	-10.8514	-455.114		38.2101	628.37	100.043	-10.6859	-57.0396
38.2208	111		38.2208	118		38.2208	116		38.2232	356.612			38.2232	40799		38.2232	-9909.9		38.2232	1085.21	155.195	-79.8514	-470.114		38.2232	636.703	97.5433	20.8141	-59.0396
38.2339	120		38.2339	120		38.2339	119		38.2363	362.912			38.2363	46799		38.2363	-7909.9		38.2363	1031.21	149.195	-85.8514	-465.614		38.2363	613.37	99.0433	-9.68591	-66.373
38.247	138		38.247	148		38.247	104		38.2494	356.312			38.2494	42799		38.2494	-11243.2		38.2494	1070.21	162.695	-39.3514	-455.114		38.2494	628.37	97.5433	-5.18591	-59.373
38.2602	130		38.2602	114		38.2602	133		38.2626	359.012			38.2626	44049		38.2626	-8443.24		38.2626	1070.21	156.695	-67.8514	-426.614		38.2626	635.037	96.5433	-6.18591	-62.0396
38.2733	134		38.2733	142		38.2733	127		38.2757	359.912			38.2757	44299		38.2757	-10309.9		38.2757	1067.21	164.195	-10.8514	-464.114		38.2757	623.37	79.5433	0.31409	-65.7063
38.2864	136		38.2864	131		38.2864	147		38.2888	357.212			38.2888	38549		38.2888	-13243.2		38.2888	1058.21	146.195	-58.8514	-465.614		38.2888	636.703	95.5433	-9.68591	-66.373
38.2996	132		38.2996	126		38.2996	130		38.302	358.412			38.302	41299		38.302	-8309.9		38.302	1103.21	158.195	-90.3514	-455.114		38.302	646.703	93.5433	-1.68591	-71.373
38.3127	111		38.3127	141		38.3127	123		38.3151	357.512			38.3151	43799		38.3151	-12843.2		38.3151	1037.21	171.695	-82.8514	-462.614		38.3151	636.703	106.043	4.31409	-64.373
38.3258	139		38.3258	104		38.3258	108		38.3282	355.412			38.3282	40299		38.3282	-10176.6		38.3282	1061.21	182.195	-52.8514	-447.614		38.3282	618.37	93.0433	-4.18591	-61.373
38.3389	135		38.3389	122		38.3389	115		38.3413	360.812			38.3413	41549		38.3413	-11643.2		38.3413	1106.21	137.195	-52.8514	-429.614		38.3413	635.037	99.5433	9.81409	-62.373
38.3521	122		38.3521	134		38.3521	127		38.3545	360.812			38.3545	37549		38.3545	-12176.6		38.3545	1109.21	159.695	-76.8514	-456.614		38.3545	625.037	100.543	4.31409	-59.373
38.3652	132		38.3652	124		38.3652	126		38.3676	360.812			38.3676	42549		38.3676	-6043.24		38.3676	1097.21	167.195	-36.3514	-420.614		38.3676	633.37	102.043	-1.68591	-63.373
38.3783	150		38.3783	124		38.3783	131		38.3807	360.812			38.3807	44299		38.3807	-10176.6		38.3807	1100.21	141.695	-51.3514	-398.114		38.3807	621.703	90.5433	-25.1859	-57.373
38.3915	134		38.3915	117		38.3915	132		38.3939	361.412			38.3939	42049		38.3939	-7109.9		38.3939	1070.21	149.195	-72.3514	-452.114		38.3939	635.037	107.043	-10.6859	-65.0396
38.4046	129		38.4046	136		38.4046	121		38.407	361.112			38.407	44049		38.407	-11509.9		38.407	1058.21	141.695	-61.8514	-467.114		38.407	641.703	97.0433	-6.68591	-61.0396
38.4177	134		38.4177	113		38.4177	119		38.4201	363.812			38.4201	43299		38.4201	-11243.2		38.4201	1076.21	167.195	-54.3514	-413.114		38.4201	626.703	96.0433	0.81409	-60.373
38.4309	121		38.4309	131		38.4309	121		38.4333	361.412			38.4333	41549		38.4333	-11909.9		38.4333	1070.21	146.195	-49.8514	-456.614		38.4333	626.703	95.0433	-7.18591	-55.373
38.444	119		38.444	132		38.444	118		38.4464	355.412			38.4464	40549		38.4464	-9509.9		38.4464	1079.21	170.195	-109.851	-434.114		38.4464	610.037	82.0433	2.81409	-65.7063
38.4571	142		38.4571	122		38.4571	130		38.4595	359.912			38.4595	40799		38.4595	-11776.6		38.4595	1073.21	170.195	-91.8514	-447.614		38.4595	630.037	97.0433	-6.18591	-72.0396
38.4703	124		38.4703	109		38.4703	107		38.4727	357.212			38.4727	39299		38.4727	-12843.2		38.4727	1058.21	162.695	-39.3514	-425.114		38.4727	618.37	100.543	-7.18591	-62.373
38.4834	145		38.4834	126		38.4834	110		38.4858	357.512			38.4858	42299		38.4858	-13376.6		38.4858	1109.21	149.195	-60.3514	-438.614		38.4858	648.37	117.043	-3.18591	-62.0396
38.4965	128		38.4965	121		38.4965	130		38.4989	356.912			38.4989	44549		38.4989	-9643.24		38.4989	1076.21	177.695	-43.8514	-422.114		38.4989	620.037	89.0433	-9.68591	-56.0396
38.5097	142		38.5097	131		38.5097	118		38.5121	359.912			38.5121	43799		38.5121	-10043.2		38.5121	1064.21	134.195	-79.8514	-419.114		38.5121	610.037	112.543	3.81409	-61.0396
38.5228	124		38.5228	138		38.5228	110		38.5252	357.212			38.5252	40049		38.5252	-10309.9		38.5252	1043.21	167.195	-61.8514	-458.114		38.5252	638.37	98.0433	4.31409	-62.0396
38.5359	128		38.5359	145		38.5359	123		38.5383	362.912			38.5383	42049		38.5383	-8443.24		38.5383	1058.21	165.695	-55.8514	-452.114		38.5383	631.703	100.043	-9.68591	-60.0396
38.549	108		38.549	130		38.549	128		38.5514	358.112			38.5514	38299		38.5514	-11109.9		38.5514	1064.21	159.695	-66.3514	-452.114		38.5514	616.703	97.5433	-4.68591	-62.0396
38.5622	125		38.5622	156		38.5622	106		38.5646	365.012			38.5646	40049		38.5646	-8576.57		38.5646	1070.21	167.195	-75.3514	-429.614		38.5646	616.703	92.5433	3.31409	-55.7063
38.5753	124		38.5753	149		38.5753	109		38.5777	362.912			38.5777	47299		38.5777	-10176.6		38.5777	1085.21	156.695	-82.8514	-459.614		38.5777	615.037	86.0433	8.81409	-63.0396
38.5884	134		38.5884	132		38.5884	111		38.5908	362.912			38.5908	43799		38.5908	-10043.2		38.5908	1076.21	159.695	-69.3514	-453.614		38.5908	636.703	96.5433	5.81409	-61.7063
38.6016	148		38.6016	127		38.6016	109		38.604	359.912			38.604	42049		38.604	-7376.57		38.604	1061.21	161.195	-72.3514	-476.114		38.604	613.37	95.0433	1.81409	-49.7063
38.6147	116		38.6147	142		38.6147	109		38.6171	365.612			38.6171	43799		38.6171	-9109.9		38.6171	1061.21	153.695	-130.851	-438.614		38.6171	631.703	95.0433	-0.68591	-61.7063
38.6278	133		38.6278	128		38.6278	128		38.6302	365.312			38.6302	42549		38.6302	-8043.24		38.6302	1067.21	146.195	-55.8514	-410.114		38.6302	648.37	109.043	-2.68591	-55.373
38.6409	138		38.6409	116		38.6409	112		38.6433	357.512			38.6433	42299		38.6433	-10976.6		38.6433	1049.21	168.695	-54.3514	-408.614		38.6433	626.703	85.0433	12.3141	-56.373
38.6541	142		38.6541	132		38.6541	122		38.6565	361.112			38.6565	37299		38.6565	-9643.24		38.6565	1094.21	159.695	-66.3514	-425.114		38.6565	606.703	95.0433	-6.18591	-60.7063
38.6672	108		38.6672	127		38.6672	130		38.6696	360.512			38.6696	40049		38.6696	-9509.9		38.6696	1091.21	161.195	-88.8514	-405.614		38.6696	631.703	100.043	-0.68591	-64.0396
38.6803	104		38.6803	118		38.6803	119		38.6827	361.712			38.6827	43549		38.6827	-7376.57		38.6827	1109.21	176.195	-40.8514	-435.614		38.6827	596.703	102.043	5.81409	-63.7063
38.6935	148		38.6935	121		38.6935	127		38.6959	368.312			38.6959	41299		38.6959	-6309.9		38.6959	1088.21	143.195	-67.8514	-456.614		38.6959	636.703	100.043	6.81409	-66.0396
38.7066	134		38.7066	132		38.7066	104		38.709	358.412			38.709	41549		38.709	-10576.6		38.709	1040.21	138.695	-36.3514	-476.114		38.709	618.37	107.543	-0.68591	-66.0396
38.7197	148		38.7197	131		38.7197	122		38.7221	361.112			38.7221	42049		38.7221	-8176.57		38.7221	1070.21	129.695	-70.8514	-459.614		38.7221	621.703	103.543	-8.18591	-55.0396
38.7329	125		38.7329	132		38.7329	117		38.7353	364.112			38.7353	38049		38.7353	-13643.2		38.7353	1067.21	135.695	-31.8514	-441.614		38.7353	625.037	94.0433	-12.1859	-59.7063
38.746	139		38.746	137		38.746	125		38.7484	363.512			38.7484	43049		38.7484	-8443.24		38.7484	1073.21	152.195	-75.3514	-447.614		38.7484	620.037	102.043	1.81409	-62.0396
38.7591	132		38.7591	128		38.7591	122		38.7615	366.512			38.7615	41549		38.7615	-8843.24		38.7615	1079.21	153.695	-69.3514	-419.114		38.7615	621.703	94.0433	-8.18591	-63.0396
38.7722	151		38.7722	132		38.7722	146		38.7747	366.512			38.7747	44299		38.7747	-8709.9		38.7747	1085.21	176.195	-66.3514	-426.614		38.7747	615.037	95.5433	8.31409	-53.7063
38.7854	130		38.7854	115		38.7854	123		38.7878	356.012			38.7878	44799		38.7878	-13643.2		38.7878	1076.21	137.195	14.6486	-431.114		38.7878	625.037	107.543	-3.18591	-62.7063
38.7985	124		38.7985	130		38.7985	124		38.8009	363.212			38.8009	40549		38.8009	-7909.9		38.8009	1076.21	174.695	-63.3514	-458.114		38.8009	623.37	99.5433	0.31409	-67.373
38.8116	135		38.8116	138		38.8116	109		38.814	365.912			38.814	44049		38.814	-9509.9		38.814	1079.21	158.195	-54.3514	-479.114		38.814	620.037	105.543	-10.1859	-64.7063
38.8248	136		38.8248	122		38.8248	117		38.8272	363.212			38.8272	38299		38.8272	-11109.9		38.8272	1070.21	153.695	-90.3514	-428.114		38.8272	616.703	87.0433	-6.68591	-58.7063
38.8379	160		38.8379	134		38.8379	128		38.8403	362.312			38.8403	42049		38.8403	-12043.2		38.8403	1031.21	156.695	-37.8514	-447.614		38.8403	633.37	93.0433	-9.18591	-57.373
38.851	115		38.851	128		38.851	115		38.8534	365.312			38.8534	42049		38.8534	-9776.57		38.8534	1046.21	144.695	-58.8514	-422.114		38.8534	633.37	95.5433	11.3141	-60.373
38.8642	147		38.8642	123		38.8642	113		38.8666	358.712			38.8666	44299		38.8666	-7243.24		38.8666	1067.21	135.695	-46.8514	-440.114		38.8666	620.037	100.043	1.81409	-62.7063
38.8773	162		38.8773	113		38.8773	116		38.8797	361.712			38.8797	42049		38.8797	-8443.24		38.8797	1064.21	170.195	-73.8514	-450.614		38.8797	626.703	113.543	-7.18591	-64.373
38.8904	139		38.8904	108		38.8904	132		38.8928	365.912			38.8928	42299		38.8928	-11109.9		38.8928	1088.21	171.695	-48.3514	-429.614		38.8928	628.37	97.5433	-8.68591	-59.7063
38.9036	156		38.9036	123		38.9036	99		38.906	359.312			38.906	45299		38.906	-11376.6		38.906	1058.21	173.195	-39.3514	-431.114		38.906	636.703	102.543	8.31409	-62.7063
38.9167	135		38.9167	145		38.9167	144		38.9191	368.012			38.9191	47799		38.9191	-10576.6		38.9191	1055.21	147.695	-19.8514	-438.614		38.9191	631.703	98.5433	8.31409	-63.7063
38.9298	127		38.9298	135		38.9298	135		38.9322	371.612			38.9322	44799		38.9322	-10576.6		38.9322	1046.21	125.195	-69.3514	-441.614		38.9322	618.37	103.543	6.31409	-55.0396
38.943	152		38.943	145		38.943	125		38.9453	365.312			38.9453	42049		38.9453	-11243.2		38.9453	1055.21	164.195	5.64856	-432.614		38.9453	641.703	94.0433	-14.1859	-58.373
38.9561	141		38.9561	157		38.9561	121		38.9585	369.212			38.9585	43049		38.9585	-9909.9		38.9585	1070.21	161.195	-30.3514	-413.114		38.9585	643.37	106.043	5.31409	-50.373
38.9692	144		38.9692	164		38.9692	130		38.9716	368.912			38.9716	40299		38.9716	-9909.9		38.9716	1058.21	132.695	-51.3514	-452.114		38.9716	628.37	86.5433	3.31409	-62.0396
38.9823	146		38.9823	134		38.9823	148		38.9847	365.612			38.9847	42049		38.9847	-10976.6		38.9847	1043.21	129.695	-69.3514	-470.114		38.9847	628.37	97.5433	2.81409	-58.0396
38.9955	135		38.9955	123		38.9955	122		38.9979	360.812			38.9979	41049		38.9979	-7376.57		38.9979	1049.21	144.695	-46.8514	-402.614		38.9979	640.037	105.043	-5.18591	-64.7063
39.0086	118		39.0086	132		39.0086	113		39.011	367.412			39.011	41299		39.011	-12443.2		39.011	1055.21	126.695	-25.8514	-431.114		39.011	641.703	75.5433	-4.18591	-51.7063
39.0217	131		39.0217	134		39.0217	128		39.0241	362.312			39.0241	41799		39.0241	-13776.6		39.0241	1082.21	146.195	-69.3514	-474.614		39.0241	628.37	95.5433	0.81409	-62.0396
39.0349	136		39.0349	166		39.0349	92		39.0373	368.312			39.0373	37549		39.0373	-9909.9		39.0373	1067.21	137.195	-66.3514	-431.114		39.0373	613.37	115.543	-4.68591	-63.0396
39.048	117		39.048	152		39.048	100		39.0504	371.612			39.0504	42799		39.0504	-7909.9		39.0504	1073.21	144.695	-81.3514	-431.114		39.0504	623.37	94.0433	-8.18591	-62.7063
39.0611	149		39.0611	145		39.0611	127		39.0635	365.312			39.0635	45799		39.0635	-10176.6		39.0635	1022.21	179.195	-39.3514	-386.114		39.0635	620.037	105.043	1.31409	-57.373
39.0742	140		39.0742	148		39.0742	127		39.0767	359.912			39.0767	43549		39.0767	-8309.9		39.0767	1043.21	137.195	-36.3514	-468.614		39.0767	638.37	100.043	1.81409	-56.373
39.0874	134		39.0874	127		39.0874	128		39.0898	366.512			39.0898	37549		39.0898	-9776.57		39.0898	1082.21	125.195	-49.8514	-426.614		39.0898	640.037	91.0433	-0.18591	-57.373
39.1005	125		39.1005	139		39.1005	118		39.1029	363.812			39.1029	44549		39.1029	-12576.6		39.1029	1073.21	150.695	-94.8514	-417.614		39.1029	626.703	92.5433	-8.18591	-59.0396
39.1136	121		39.1136	139		39.1136	116		39.116	362.612			39.116	43299		39.116	-7776.57		39.116	1064.21	158.195	-70.8514	-467.114		39.116	621.703	105.043	-13.1859	-59.0396
39.1268	154		39.1268	124		39.1268	116		39.1292	366.212			39.1292	45049		39.1292	-8443.24		39.1292	1067.21	158.195	-40.8514	-462.614		39.1292	615.037	108.543	-1.68591	-69.0396
39.1399	138		39.1399	144		39.1399	128		39.1423	367.712			39.1423	41299		39.1423	-8843.24		39.1423	1088.21	149.195	-51.3514	-428.114		39.1423	618.37	87.5433	-12.1859	-62.373
39.153	139		39.153	138		39.153	100		39.1554	365.312			39.1554	40049		39.1554	-13509.9		39.1554	1076.21	149.195	-18.3514	-407.114		39.1554	641.703	103.043	20.3141	-67.0396
39.1662	141		39.1662	134		39.1662	133		39.1686	366.212			39.1686	39799		39.1686	-12976.6		39.1686	1061.21	182.195	-45.3514	-461.114		39.1686	631.703	106.043	-2.18591	-64.7063
39.1793	128		39.1793	134		39.1793	144		39.1817	368.912			39.1817	40049		39.1817	-8709.9		39.1817	1055.21	147.695	-60.3514	-420.614		39.1817	620.037	100.543	5.31409	-63.7063
39.1924	122		39.1924	127		39.1924	140		39.1948	368.012			39.1948	44799		39.1948	-10843.2		39.1948	1073.21	129.695	-12.3514	-446.114		39.1948	633.37	95.0433	-2.68591	-61.7063
39.2056	114		39.2056	132		39.2056	148		39.2079	362.312			39.2079	43299		39.2079	-9376.57		39.2079	1058.21	182.195	11.6486	-434.114		39.2079	628.37	114.543	-4.18591	-63.7063
39.2187	143		39.2187	126		39.2187	133		39.2211	368.912			39.2211	44549		39.2211	-10976.6		39.2211	1049.21	156.695	-75.3514	-459.614		39.2211	638.37	114.043	-3.18591	-63.7063
39.2318	139		39.2318	159		39.2318	132		39.2342	359.612			39.2342	43549		39.2342	-8176.57		39.2342	1079.21	161.195	-70.8514	-435.614		39.2342	633.37	92.0433	-13.6859	-57.0396
39.2449	127		39.2449	162		39.2449	141		39.2473	362.012			39.2473	45549		39.2473	-10176.6		39.2473	1046.21	153.695	-57.3514	-458.114		39.2473	611.703	105.543	0.81409	-61.7063
39.2581	136		39.2581	143		39.2581	129		39.2605	364.112			39.2605	41299		39.2605	-10976.6		39.2605	1070.21	155.195	-52.8514	-435.614		39.2605	625.037	96.0433	0.31409	-69.0396
39.2712	147		39.2712	147		39.2712	127		39.2736	366.212			39.2736	38299		39.2736	-7509.9		39.2736	1055.21	159.695	-15.3514	-416.114		39.2736	628.37	96.5433	1.81409	-58.373
39.2843	146		39.2843	138		39.2843	120		39.2867	368.012			39.2867	43049		39.2867	-9376.57		39.2867	1061.21	147.695	-67.8514	-401.114		39.2867	630.037	80.0433	-1.18591	-55.7063
39.2975	136		39.2975	130		39.2975	115		39.2999	364.712			39.2999	37299		39.2999	-10443.2		39.2999	1088.21	147.695	-87.3514	-431.114		39.2999	618.37	100.043	-1.18591	-61.7063
39.3106	130		39.3106	134		39.3106	110		39.313	367.412			39.313	41549		39.313	-6709.9		39.313	1049.21	134.195	-24.3514	-402.614		39.313	625.037	95.5433	-4.68591	-63.0396
39.3237	153		39.3237	136		39.3237	98		39.3261	368.012			39.3261	40799		39.3261	-11243.2		39.3261	1070.21	150.695	-115.851	-417.614		39.3261	643.37	121.543	5.81409	-60.0396
39.3368	134		39.3368	135		39.3368	127		39.3392	367.712			39.3392	38049		39.3392	-11509.9		39.3392	1058.21	144.695	-39.3514	-420.614		39.3392	625.037	100.543	-3.18591	-59.7063
39.35	141		39.35	135		39.35	130		39.3524	368.312			39.3524	43049		39.3524	-10709.9		39.3524	1055.21	147.695	-22.8514	-444.614		39.3524	626.703	96.5433	-8.68591	-63.0396
39.3631	137		39.3631	142		39.3631	132		39.3655	361.712			39.3655	43799		39.3655	-13243.2		39.3655	1109.21	150.695	-27.3514	-447.614		39.3655	625.037	111.043	-17.1859	-60.7063
39.3762	151		39.3762	136		39.3762	133		39.3787	367.712			39.3787	43049		39.3787	-13109.9		39.3787	1034.21	159.695	-37.8514	-465.614		39.3787	606.703	97.0433	12.8141	-58.7063
39.3894	118		39.3894	124		39.3894	105		39.3918	358.112			39.3918	46799		39.3918	-9776.57		39.3918	1037.21	146.195	-105.351	-465.614		39.3918	631.703	99.0433	-8.68591	-64.0396
39.4025	135		39.4025	138		39.4025	134		39.4049	366.212			39.4049	45549		39.4049	-9509.9		39.4049	1055.21	161.195	-54.3514	-437.114		39.4049	630.037	100.543	5.81409	-58.0396
39.4156	121		39.4156	132		39.4156	106		39.418	361.112			39.418	42299		39.418	-7643.24		39.418	1043.21	128.195	-112.851	-443.114		39.418	646.703	96.0433	3.81409	-65.373
39.4288	125		39.4288	150		39.4288	110		39.4312	363.812			39.4312	45549		39.4312	-11776.6		39.4312	1040.21	134.195	-61.8514	-452.114		39.4312	620.037	97.5433	-0.68591	-59.373
39.4419	118		39.4419	145		39.4419	108		39.4443	365.312			39.4443	41799		39.4443	-11643.2		39.4443	1052.21	168.695	-108.351	-431.114		39.4443	623.37	86.0433	12.8141	-57.373
39.455	122		39.455	157		39.455	138		39.4574	361.712			39.4574	41549		39.4574	-12709.9		39.4574	1061.21	152.195	-30.3514	-494.114		39.4574	633.37	90.0433	4.31409	-60.0396
39.4682	140		39.4682	157		39.4682	132		39.4706	362.312			39.4706	41049		39.4706	-13509.9		39.4706	1022.21	179.195	-129.351	-431.114		39.4706	625.037	99.0433	2.81409	-58.373
39.4813	141		39.4813	147		39.4813	126		39.4837	355.712			39.4837	42799		39.4837	-10176.6		39.4837	1070.21	170.195	-64.8514	-453.614		39.4837	628.37	98.0433	-9.18591	-62.373
39.4944	120		39.4944	122		39.4944	125		39.4968	359.612			39.4968	42799		39.4968	-13909.9		39.4968	1064.21	159.695	-31.8514	-423.614		39.4968	620.037	100.043	9.31409	-54.373
39.5076	134		39.5076	144		39.5076	152		39.51	368.612			39.51	44299		39.51	-12043.2		39.51	1037.21	158.195	-36.3514	-438.614		39.51	618.37	110.543	-0.18591	-59.0396
39.5207	122		39.5207	136		39.5207	154		39.5231	364.112			39.5231	42799		39.5231	-13643.2		39.5231	1058.21	165.695	-42.3514	-438.614		39.5231	628.37	104.043	1.31409	-59.373
39.5338	132		39.5338	147		39.5338	108		39.5362	364.712			39.5362	41049		39.5362	-8443.24		39.5362	1025.21	147.695	-63.3514	-428.114		39.5362	618.37	94.5433	-7.18591	-61.7063
39.5469	143		39.5469	154		39.5469	119		39.5493	358.712			39.5493	39049		39.5493	-10709.9		39.5493	1094.21	156.695	-57.3514	-425.114		39.5493	620.037	101.043	18.3141	-50.0396
39.5601	127		39.5601	134		39.5601	126		39.5625	359.012			39.5625	39549		39.5625	-11109.9		39.5625	1046.21	159.695	-51.3514	-423.614		39.5625	608.37	102.043	7.31409	-48.7063
39.5732	114		39.5732	148		39.5732	117		39.5756	360.512			39.5756	43299		39.5756	-8709.9		39.5756	1040.21	156.695	-108.351	-407.114		39.5756	628.37	105.543	2.31409	-60.373
39.5863	126		39.5863	135		39.5863	119		39.5887	357.512			39.5887	39549		39.5887	-10576.6		39.5887	1049.21	159.695	-70.8514	-431.114		39.5887	626.703	102.043	3.81409	-58.0396
39.5995	133		39.5995	126		39.5995	137		39.6019	362.612			39.6019	43299		39.6019	-6843.24		39.6019	1052.21	143.195	-39.3514	-434.114		39.6019	630.037	105.543	8.31409	-54.0396
39.6126	122		39.6126	141		39.6126	119		39.615	360.812			39.615	43299		39.615	-10309.9		39.615	1037.21	162.695	-31.8514	-441.614		39.615	621.703	105.043	3.31409	-59.7063
39.6257	121		39.6257	106		39.6257	137		39.6281	358.112			39.6281	41049		39.6281	-8976.57		39.6281	1052.21	135.695	-58.8514	-443.114		39.6281	650.037	105.043	7.81409	-50.7063
39.6388	122		39.6388	157		39.6388	124		39.6412	360.512			39.6412	50549		39.6412	-10443.2		39.6412	1061.21	155.195	-18.3514	-389.114		39.6412	605.037	109.543	-3.18591	-57.7063
39.652	130		39.652	149		39.652	132		39.6544	365.012			39.6544	41299		39.6544	-11243.2		39.6544	1052.21	167.195	-40.8514	-443.114		39.6544	621.703	104.043	-1.68591	-61.373
39.6651	132		39.6651	128		39.6651	119		39.6675	358.412			39.6675	43799		39.6675	-11243.2		39.6675	1058.21	152.195	-27.3514	-435.614		39.6675	633.37	100.543	10.3141	-54.7063
39.6782	145		39.6782	158		39.6782	115		39.6806	359.912			39.6806	40299		39.6806	-14176.6		39.6806	1070.21	155.195	-13.8514	-438.614		39.6806	628.37	93.5433	4.81409	-62.7063
39.6914	129		39.6914	108		39.6914	106		39.6938	363.812			39.6938	44049		39.6938	-10176.6		39.6938	1064.21	162.695	-51.3514	-392.114		39.6938	613.37	94.5433	-8.68591	-67.0396
39.7045	114		39.7045	128		39.7045	129		39.7069	363.812			39.7069	45799		39.7069	-13109.9		39.7069	1043.21	168.695	-111.351	-402.614		39.7069	620.037	101.543	6.31409	-56.0396
39.7176	126		39.7176	141		39.7176	131		39.72	355.712			39.72	40799		39.72	-10976.6		39.72	1043.21	170.195	-40.8514	-402.614		39.72	603.37	106.043	10.8141	-57.7063
39.7308	135		39.7308	119		39.7308	136		39.7332	356.912			39.7332	45049		39.7332	-7509.9		39.7332	1046.21	146.195	-42.3514	-461.114		39.7332	626.703	102.543	-3.18591	-60.7063
39.7439	126		39.7439	127		39.7439	112		39.7463	362.612			39.7463	44299		39.7463	-11243.2		39.7463	1061.21	141.695	-73.8514	-417.614		39.7463	623.37	101.043	-3.18591	-60.0396
39.757	141		39.757	135		39.757	100		39.7594	363.812			39.7594	41299		39.7594	-12443.2		39.7594	1046.21	170.195	-69.3514	-435.614		39.7594	615.037	98.0433	15.3141	-55.373
39.7702	131		39.7702	118		39.7702	117		39.7726	367.412			39.7726	41049		39.7726	-9643.24		39.7726	1055.21	131.195	-57.3514	-470.114		39.7726	623.37	98.5433	0.81409	-57.373
39.7833	123		39.7833	149		39.7833	117		39.7857	353.612			39.7857	44799		39.7857	-14043.2		39.7857	1070.21	125.195	-93.3514	-381.614		39.7857	616.703	90.0433	-2.68591	-54.373
39.7964	118		39.7964	152		39.7964	103		39.7988	361.412			39.7988	40299		39.7988	-8176.57		39.7988	1073.21	162.695	17.6486	-453.614		39.7988	630.037	100.043	2.31409	-54.7063
39.8095	129		39.8095	113		39.8095	120		39.8119	360.212			39.8119	42799		39.8119	-9509.9		39.8119	1052.21	149.195	-64.8514	-423.614		39.8119	615.037	104.543	-0.68591	-56.7063
39.8227	134		39.8227	117		39.8227	101		39.8251	359.312			39.8251	43049		39.8251	-8443.24		39.8251	1085.21	158.195	-75.3514	-440.114		39.8251	615.037	105.543	-6.18591	-64.0396
39.8358	108		39.8358	148		39.8358	118		39.8382	362.012			39.8382	43799		39.8382	-11776.6		39.8382	1085.21	155.195	-6.35144	-440.114		39.8382	628.37	103.543	5.81409	-60.7063
39.8489	123		39.8489	148		39.8489	107		39.8513	359.612			39.8513	41049		39.8513	-7909.9		39.8513	1064.21	150.695	-31.8514	-410.114		39.8513	635.037	96.5433	4.31409	-58.373
39.8621	123		39.8621	122		39.8621	118		39.8645	363.212			39.8645	42299		39.8645	-7109.9		39.8645	1064.21	125.195	-46.8514	-389.114		39.8645	610.037	90.0433	-4.68591	-53.7063
39.8752	142		39.8752	132		39.8752	108		39.8776	356.912			39.8776	42049		39.8776	-7109.9		39.8776	1064.21	156.695	-58.8514	-420.614		39.8776	621.703	98.5433	2.81409	-56.7063
39.8883	122		39.8883	135		39.8883	144		39.8907	360.812			39.8907	41049		39.8907	-6176.57		39.8907	1088.21	141.695	-46.8514	-449.114		39.8907	641.703	104.543	-8.18591	-60.373
39.9015	111		39.9015	119		39.9015	125		39.9039	356.012			39.9039	46049		39.9039	-8043.24		39.9039	1043.21	156.695	-108.351	-438.614		39.9039	643.37	92.0433	0.81409	-58.0396
39.9146	126		39.9146	145		39.9146	107		39.917	363.212			39.917	47049		39.917	-8843.24		39.917	1070.21	182.195	-45.3514	-441.614		39.917	620.037	95.0433	0.31409	-57.373
39.9277	133		39.9277	127		39.9277	101		39.9301	361.412			39.9301	40799		39.9301	-6709.9		39.9301	1046.21	135.695	-124.851	-440.114		39.9301	645.037	96.5433	-6.68591	-71.373
39.9408	129		39.9408	129		39.9408	133		39.9432	361.712			39.9432	42299		39.9432	-6176.57		39.9432	1061.21	161.195	-27.3514	-435.614		39.9432	638.37	109.543	8.31409	-65.7063
39.954	136		39.954	125		39.954	139		39.9564	356.912			39.9564	46299		39.9564	-10709.9		39.9564	1082.21	182.195	-42.3514	-435.614		39.9564	626.703	101.043	-1.68591	-63.373
39.9671	132		39.9671	130		39.9671	125		39.9695	357.512			39.9695	41299		39.9695	-8309.9		39.9695	1058.21	129.695	-84.3514	-431.114		39.9695	618.37	105.543	-5.68591	-57.0396
39.9802	143		39.9802	148		39.9802	119		39.9826	354.812			39.9826	43049		39.9826	-9109.9		39.9826	1064.21	182.195	-43.8514	-428.114		39.9826	620.037	94.5433	1.81409	-62.0396
39.9934	134		39.9934	145		39.9934	120		39.9958	353.612			39.9958	41799		39.9958	-8443.24		39.9958	1043.21	162.695	-63.3514	-440.114		39.9958	626.703	105.543	2.31409	-57.7063
40.0065	126		40.0065	139		40.0065	112		40.0089	353.312			40.0089	42799		40.0089	-10309.9		40.0089	1082.21	159.695	-28.8514	-432.614		40.0089	640.037	105.543	-8.18591	-63.0396
40.0196	130		40.0196	137		40.0196	117		40.022	361.112			40.022	43549		40.022	-13643.2		40.022	1031.21	161.195	-76.8514	-410.114		40.022	625.037	96.5433	8.31409	-60.7063
40.0328	113		40.0328	134		40.0328	130		40.0352	361.412			40.0352	42049		40.0352	-11909.9		40.0352	1055.21	147.695	-60.3514	-480.614		40.0352	641.703	101.043	0.81409	-60.7063
40.0459	114		40.0459	121		40.0459	116		40.0483	350.912			40.0483	40549		40.0483	-14709.9		40.0483	1043.21	158.195	-12.3514	-438.614		40.0483	618.37	93.5433	11.3141	-55.7063
40.059	122		40.059	129		40.059	118		40.0614	365.312			40.0614	38799		40.0614	-9243.24		40.0614	1055.21	174.695	-52.8514	-470.114		40.0614	628.37	101.543	-0.68591	-63.373
40.0722	124		40.0722	126		40.0722	136		40.0746	356.012			40.0746	42049		40.0746	-6976.57		40.0746	1052.21	140.195	-46.8514	-401.114		40.0746	633.37	92.5433	6.81409	-54.0396
40.0853	132		40.0853	121		40.0853	114		40.0877	359.312			40.0877	39549		40.0877	-8976.57		40.0877	1094.21	164.195	11.6486	-450.614		40.0877	646.703	100.543	7.81409	-54.373
40.0984	117		40.0984	130		40.0984	127		40.1008	360.212			40.1008	38049		40.1008	-11909.9		40.1008	1061.21	135.695	-75.3514	-458.114		40.1008	613.37	100.043	13.8141	-50.373
40.1115	130		40.1115	127		40.1115	92		40.1139	351.512			40.1139	42549		40.1139	-11109.9		40.1139	1043.21	162.695	-79.8514	-431.114		40.1139	615.037	108.543	1.31409	-53.0396
40.1247	130		40.1247	118		40.1247	141		40.1271	358.712			40.1271	39799		40.1271	-11509.9		40.1271	1046.21	165.695	-91.8514	-411.614		40.1271	636.703	97.5433	1.81409	-65.373
40.1378	123		40.1378	140		40.1378	126		40.1402	358.712			40.1402	40299		40.1402	-8843.24		40.1402	1046.21	152.195	-81.3514	-437.114		40.1402	615.037	96.5433	8.31409	-54.7063
40.1509	112		40.1509	135		40.1509	116		40.1533	356.612			40.1533	42549		40.1533	-4976.57		40.1533	1055.21	152.195	-51.3514	-413.114		40.1533	626.703	101.043	-11.1859	-59.373
40.1641	104		40.1641	121		40.1641	115		40.1665	356.612			40.1665	44049		40.1665	-10443.2		40.1665	1037.21	159.695	-43.8514	-402.614		40.1665	621.703	108.543	-0.18591	-56.7063
40.1772	129		40.1772	132		40.1772	87		40.1796	356.912			40.1796	41299		40.1796	-7643.24		40.1796	1055.21	155.195	-36.3514	-398.114		40.1796	648.37	100.043	-12.1859	-63.373
40.1903	123		40.1903	111		40.1903	123		40.1927	359.012			40.1927	43049		40.1927	-12309.9		40.1927	1052.21	168.695	-30.3514	-416.114		40.1927	626.703	103.543	-12.6859	-55.7063
40.2034	128		40.2034	113		40.2034	119		40.2058	354.512			40.2058	44799		40.2058	-8176.57		40.2058	1064.21	162.695	-34.8514	-434.114		40.2058	620.037	99.0433	-0.18591	-58.0396
40.2166	112		40.2166	107		40.2166	120		40.219	360.212			40.219	43049		40.219	-6843.24		40.219	1058.21	146.195	-6.35144	-401.114		40.219	608.37	104.543	4.81409	-64.373
40.2297	111		40.2297	143		40.2297	106		40.2321	356.012			40.2321	39799		40.2321	-8176.57		40.2321	1058.21	162.695	-64.8514	-461.114		40.2321	626.703	96.0433	9.81409	-59.7063
40.2428	119		40.2428	131		40.2428	123		40.2452	358.412			40.2452	43299		40.2452	-10443.2		40.2452	1055.21	135.695	-81.3514	-449.114		40.2452	633.37	91.0433	12.3141	-61.0396
40.256	106		40.256	121		40.256	137		40.2584	355.412			40.2584	38299		40.2584	-8576.57		40.2584	1043.21	144.695	-45.3514	-426.614		40.2584	640.037	102.543	-3.68591	-57.0396
40.2691	121		40.2691	129		40.2691	116		40.2715	356.612			40.2715	44049		40.2715	-8976.57		40.2715	1046.21	144.695	-57.3514	-369.614		40.2715	616.703	93.0433	7.31409	-58.0396
40.2822	124		40.2822	136		40.2822	121		40.2846	357.212			40.2846	40549		40.2846	-13243.2		40.2846	1043.21	135.695	-66.3514	-401.114		40.2846	638.37	103.043	1.31409	-54.373
40.2954	129		40.2954	141		40.2954	128		40.2978	357.212			40.2978	42549		40.2978	-11909.9		40.2978	1070.21	170.195	-63.3514	-413.114		40.2978	625.037	98.0433	1.31409	-62.373
40.3085	124		40.3085	144		40.3085	103		40.3109	356.612			40.3109	40299		40.3109	-8843.24		40.3109	1064.21	165.695	-58.8514	-435.614		40.3109	643.37	94.5433	11.8141	-60.7063
40.3216	109		40.3216	135		40.3216	96		40.324	356.012			40.324	42049		40.324	-12043.2		40.324	1040.21	149.195	-58.8514	-438.614		40.324	648.37	111.543	10.8141	-52.7063
40.3348	152		40.3348	113		40.3348	129		40.3372	357.212			40.3372	40799		40.3372	-11376.6		40.3372	1067.21	134.195	-28.8514	-473.114		40.3372	621.703	97.5433	-3.18591	-60.0396
40.3479	139		40.3479	125		40.3479	119		40.3503	353.612			40.3503	41299		40.3503	-7909.9		40.3503	1079.21	158.195	-82.8514	-458.114		40.3503	641.703	92.0433	-0.68591	-54.0396
40.361	117		40.361	121		40.361	115		40.3634	358.412			40.3634	42299		40.3634	-9243.24		40.3634	1064.21	146.195	-79.8514	-444.614		40.3634	616.703	105.543	8.81409	-59.7063
40.3742	119		40.3742	138		40.3742	118		40.3766	362.912			40.3766	40299		40.3766	-10576.6		40.3766	1055.21	155.195	-66.3514	-428.114		40.3766	621.703	92.5433	4.31409	-59.373
40.3873	153		40.3873	126		40.3873	129		40.3897	354.212			40.3897	40299		40.3897	-9909.9		40.3897	1085.21	143.195	-67.8514	-420.614		40.3897	623.37	97.5433	7.81409	-50.373
40.4004	116		40.4004	118		40.4004	119		40.4028	360.812			40.4028	46049		40.4028	-9909.9		40.4028	1061.21	147.695	-67.8514	-434.114		40.4028	640.037	102.043	-5.68591	-56.0396
40.4135	117		40.4135	127		40.4135	127		40.4159	354.812			40.4159	43549		40.4159	-8709.9		40.4159	1058.21	149.195	-39.3514	-449.114		40.4159	620.037	96.5433	2.81409	-58.0396
40.4267	105		40.4267	106		40.4267	127		40.4291	360.812			40.4291	44049		40.4291	-6443.24		40.4291	1109.21	186.695	-43.8514	-453.614		40.4291	631.703	93.5433	-12.1859	-59.373
40.4398	141		40.4398	127		40.4398	99		40.4422	357.212			40.4422	42799		40.4422	-11376.6		40.4422	1034.21	132.695	-18.3514	-390.614		40.4422	623.37	100.043	10.8141	-66.7063
40.4529	116		40.4529	116		40.4529	133		40.4553	359.612			40.4553	41799		40.4553	-6576.57		40.4553	1064.21	162.695	-39.3514	-410.114		40.4553	611.703	93.5433	5.31409	-53.7063
40.4661	107		40.4661	101		40.4661	104		40.4685	353.012			40.4685	45049		40.4685	-6043.24		40.4685	1052.21	176.195	-78.3514	-450.614		40.4685	620.037	108.543	-6.68591	-59.7063
40.4792	109		40.4792	112		40.4792	107		40.4816	352.712			40.4816	42049		40.4816	-10176.6		40.4816	1064.21	155.195	-91.8514	-440.114		40.4816	630.037	113.043	-1.68591	-50.373
40.4923	149		40.4923	132		40.4923	104		40.4947	352.112			40.4947	44049		40.4947	-8443.24		40.4947	1028.21	152.195	-28.8514	-449.114		40.4947	636.703	87.5433	-6.68591	-63.0396
40.5055	119		40.5055	129		40.5055	107		40.5078	360.212			40.5078	45299		40.5078	-8843.24		40.5078	1094.21	200.195	-12.3514	-441.614		40.5078	621.703	90.0433	-2.68591	-60.0396
40.5186	109		40.5186	139		40.5186	129		40.521	352.412			40.521	41799		40.521	-9509.9		40.521	1049.21	162.695	-46.8514	-422.114		40.521	616.703	88.0433	-11.1859	-57.373
40.5317	126		40.5317	124		40.5317	107		40.5341	353.012			40.5341	42299		40.5341	-10443.2		40.5341	1073.21	149.195	-43.8514	-465.614		40.5341	646.703	100.543	0.31409	-55.7063
40.5448	141		40.5448	140		40.5448	103		40.5472	358.112			40.5472	38299		40.5472	-9243.24		40.5472	1100.21	158.195	-48.3514	-441.614		40.5472	621.703	89.0433	6.31409	-58.0396
40.558	136		40.558	126		40.558	113		40.5604	359.012			40.5604	40549		40.5604	-13243.2		40.5604	1058.21	173.195	-54.3514	-446.114		40.5604	633.37	105.543	-7.68591	-54.7063
40.5711	106		40.5711	137		40.5711	103		40.5735	359.612			40.5735	42549		40.5735	-10443.2		40.5735	1079.21	177.695	-84.3514	-417.614		40.5735	625.037	97.0433	-7.18591	-61.7063
40.5842	133		40.5842	102		40.5842	120		40.5866	355.112			40.5866	42799		40.5866	-9776.57		40.5866	1046.21	147.695	-27.3514	-390.614		40.5866	615.037	102.043	-14.1859	-58.7063
40.5974	112		40.5974	100		40.5974	84		40.5998	353.312			40.5998	41549		40.5998	-12176.6		40.5998	1022.21	141.695	-48.3514	-453.614		40.5998	636.703	102.043	-6.18591	-58.373
40.6105	123		40.6105	140		40.6105	113		40.6129	356.312			40.6129	40049		40.6129	-12309.9		40.6129	1055.21	149.195	-67.8514	-413.114		40.6129	621.703	104.543	-0.68591	-58.373
40.6236	111		40.6236	123		40.6236	112		40.626	359.612			40.626	41299		40.626	-10443.2		40.626	1058.21	153.695	-76.8514	-416.114		40.626	623.37	107.043	-4.18591	-50.0396
40.6367	119		40.6367	104		40.6367	126		40.6392	356.312			40.6392	39549		40.6392	-13909.9		40.6392	1049.21	153.695	-66.3514	-431.114		40.6392	618.37	102.543	4.81409	-65.0396
40.6499	132		40.6499	122		40.6499	109		40.6523	358.112			40.6523	39299		40.6523	-9509.9		40.6523	1058.21	153.695	-75.3514	-465.614		40.6523	633.37	91.0433	-14.6859	-60.0396
40.663	105		40.663	105		40.663	118		40.6654	358.112			40.6654	42299		40.6654	-6176.57		40.6654	1061.21	168.695	-49.8514	-428.114		40.6654	621.703	110.543	-6.18591	-60.7063
40.6761	153		40.6761	108		40.6761	119		40.6785	359.012			40.6785	44549		40.6785	-11109.9		40.6785	1037.21	173.195	-45.3514	-425.114		40.6785	613.37	103.043	1.81409	-60.373
40.6893	156		40.6893	122		40.6893	98		40.6917	354.512			40.6917	40799		40.6917	-5243.24		40.6917	1055.21	185.195	-57.3514	-434.114		40.6917	615.037	102.043	1.31409	-59.373
40.7024	130		40.7024	105		40.7024	116		40.7048	351.512			40.7048	46049		40.7048	-8843.24		40.7048	1064.21	147.695	-42.3514	-405.614		40.7048	606.703	87.5433	-12.6859	-63.373
40.7155	142		40.7155	118		40.7155	95		40.7179	356.912			40.7179	39049		40.7179	-13376.6		40.7179	1040.21	137.195	-40.8514	-435.614		40.7179	641.703	89.5433	0.31409	-64.7063
40.7287	117		40.7287	117		40.7287	103		40.7311	360.512			40.7311	44299		40.7311	-11909.9		40.7311	1043.21	171.695	-87.3514	-474.614		40.7311	623.37	95.0433	4.81409	-58.0396
40.7418	119		40.7418	121		40.7418	121		40.7442	360.512			40.7442	41549		40.7442	-11376.6		40.7442	1055.21	152.195	-63.3514	-399.614		40.7442	621.703	95.0433	-10.6859	-65.7063
40.7549	118		40.7549	120		40.7549	127		40.7573	354.812			40.7573	41799		40.7573	-11109.9		40.7573	1061.21	152.195	-34.8514	-434.114		40.7573	620.037	110.043	-13.6859	-55.373
40.7681	124		40.7681	131		40.7681	115		40.7705	354.812			40.7705	46299		40.7705	-10309.9		40.7705	1064.21	161.195	-12.3514	-420.614		40.7705	625.037	93.0433	-3.68591	-56.0396
40.7812	105		40.7812	127		40.7812	133		40.7836	356.012			40.7836	41049		40.7836	-10976.6		40.7836	1061.21	177.695	-93.3514	-431.114		40.7836	625.037	90.0433	2.31409	-61.373
40.7943	120		40.7943	115		40.7943	159		40.7967	362.612			40.7967	44799		40.7967	-11509.9		40.7967	1079.21	134.195	-85.8514	-405.614		40.7967	625.037	110.543	4.31409	-54.0396
40.8075	120		40.8075	123		40.8075	110		40.8098	356.312			40.8098	36799		40.8098	-10043.2		40.8098	1055.21	146.195	-106.851	-363.614		40.8098	630.037	104.543	13.8141	-65.7063
40.8206	108		40.8206	144		40.8206	112		40.823	359.912			40.823	41549		40.823	-10043.2		40.823	1079.21	141.695	-54.3514	-425.114		40.823	618.37	94.5433	5.31409	-65.373
40.8337	113		40.8337	131		40.8337	135		40.8361	352.412			40.8361	42549		40.8361	-8043.24		40.8361	1052.21	162.695	-79.8514	-459.614		40.8361	641.703	97.0433	-6.18591	-53.0396
40.8468	117		40.8468	118		40.8468	102		40.8492	357.212			40.8492	45299		40.8492	-10043.2		40.8492	1058.21	170.195	-75.3514	-443.114		40.8492	608.37	101.043	-9.68591	-58.0396
40.86	132		40.86	136		40.86	112		40.8624	361.712			40.8624	39799		40.8624	-13109.9		40.8624	1085.21	173.195	-54.3514	-413.114		40.8624	623.37	92.0433	-3.68591	-63.0396
40.8731	133		40.8731	125		40.8731	123		40.8755	354.812			40.8755	42299		40.8755	-12976.6		40.8755	1055.21	168.695	-31.8514	-492.614		40.8755	613.37	101.543	3.81409	-56.0396
40.8862	120		40.8862	127		40.8862	133		40.8886	353.312			40.8886	41799		40.8886	-9909.9		40.8886	1031.21	179.195	-93.3514	-456.614		40.8886	611.703	106.043	-0.18591	-65.373
40.8994	122		40.8994	136		40.8994	123		40.9018	356.912			40.9018	43549		40.9018	-12709.9		40.9018	1052.21	159.695	-63.3514	-459.614		40.9018	631.703	92.5433	3.31409	-65.373
40.9125	121		40.9125	134		40.9125	120		40.9149	359.912			40.9149	41299		40.9149	-9376.57		40.9149	1055.21	176.195	-33.3514	-429.614		40.9149	633.37	91.5433	-8.68591	-65.0396
40.9256	129		40.9256	122		40.9256	100		40.928	356.012			40.928	45549		40.928	-11376.6		40.928	1082.21	155.195	-69.3514	-399.614		40.928	626.703	100.543	-10.6859	-62.7063
40.9387	123		40.9387	121		40.9387	103		40.9412	353.612			40.9412	40799		40.9412	-10976.6		40.9412	1046.21	144.695	-52.8514	-434.114		40.9412	620.037	96.0433	-5.18591	-62.0396
40.9519	92		40.9519	131		40.9519	125		40.9543	356.312			40.9543	40299		40.9543	-8843.24		40.9543	1022.21	156.695	-3.35144	-417.614		40.9543	621.703	91.5433	-5.68591	-60.0396
40.965	124		40.965	119		40.965	115		40.9674	354.512			40.9674	42299		40.9674	-9776.57		40.9674	1064.21	153.695	-54.3514	-414.614		40.9674	610.037	97.5433	-18.6859	-57.0396
40.9781	106		40.9781	112		40.9781	110		40.9805	359.612			40.9805	39049		40.9805	-8176.57		40.9805	1091.21	159.695	-73.8514	-407.114		40.9805	600.037	98.0433	7.81409	-54.373
40.9913	120		40.9913	119		40.9913	105		40.9937	362.012			40.9937	47549		40.9937	-9376.57		40.9937	1034.21	149.195	-45.3514	-414.614		40.9937	640.037	99.0433	13.3141	-56.7063
41.0044	126		41.0044	115		41.0044	117		41.0068	358.112			41.0068	47799		41.0068	-9776.57		41.0068	1055.21	132.695	-76.8514	-461.114		41.0068	630.037	93.0433	-13.1859	-63.7063
41.0175	127		41.0175	113		41.0175	116		41.0199	355.112			41.0199	43549		41.0199	-10309.9		41.0199	1070.21	173.195	-69.3514	-452.114		41.0199	625.037	91.0433	-6.68591	-58.7063
41.0307	116		41.0307	121		41.0307	101		41.0331	355.412			41.0331	43549		41.0331	-10976.6		41.0331	1049.21	149.195	-82.8514	-434.114		41.0331	621.703	100.543	-7.18591	-53.373
41.0438	98		41.0438	104		41.0438	112		41.0462	354.812			41.0462	44049		41.0462	-8443.24		41.0462	1043.21	170.195	-81.3514	-419.114		41.0462	625.037	97.5433	4.31409	-58.0396
41.0569	120		41.0569	132		41.0569	113		41.0593	357.512			41.0593	43049		41.0593	-14443.2		41.0593	1049.21	153.695	-84.3514	-453.614		41.0593	618.37	103.043	0.81409	-51.0396
41.0701	108		41.0701	132		41.0701	106		41.0725	355.412			41.0725	42549		41.0725	-9376.57		41.0725	1058.21	170.195	-69.3514	-396.614		41.0725	633.37	101.543	-2.68591	-62.7063
41.0832	120		41.0832	104		41.0832	105		41.0856	363.212			41.0856	40299		41.0856	-8309.9		41.0856	1049.21	168.695	-73.8514	-396.614		41.0856	621.703	97.5433	1.31409	-49.0396
41.0963	115		41.0963	130		41.0963	111		41.0987	356.612			41.0987	38299		41.0987	-14576.6		41.0987	1070.21	131.195	-19.8514	-429.614		41.0987	636.703	87.5433	-9.68591	-54.0396
41.1094	102		41.1094	132		41.1094	123		41.1118	357.212			41.1118	42049		41.1118	-9509.9		41.1118	1055.21	165.695	-108.351	-449.114		41.1118	621.703	99.0433	6.31409	-60.373
41.1226	118		41.1226	112		41.1226	97		41.125	356.612			41.125	39799		41.125	-8043.24		41.125	1064.21	171.695	-48.3514	-425.114		41.125	633.37	92.5433	5.31409	-54.0396
41.1357	86		41.1357	116		41.1357	131		41.1381	356.612			41.1381	46549		41.1381	-8043.24		41.1381	1067.21	161.195	-94.8514	-456.614		41.1381	611.703	98.5433	13.3141	-53.373
41.1488	117		41.1488	124		41.1488	121		41.1512	355.712			41.1512	43799		41.1512	-10843.2		41.1512	1031.21	165.695	-58.8514	-438.614		41.1512	608.37	104.543	-11.1859	-55.7063
41.162	109		41.162	107		41.162	117		41.1644	353.912			41.1644	42299		41.1644	-11909.9		41.1644	1052.21	174.695	-33.3514	-419.114		41.1644	610.037	100.043	-16.1859	-59.0396
41.1751	114		41.1751	130		41.1751	127		41.1775	363.512			41.1775	44799		41.1775	-10309.9		41.1775	1046.21	155.195	-42.3514	-395.114		41.1775	638.37	104.543	-5.68591	-53.0396
41.1882	119		41.1882	109		41.1882	93		41.1906	354.512			41.1906	46049		41.1906	-9243.24		41.1906	1043.21	159.695	-67.8514	-456.614		41.1906	625.037	94.0433	4.31409	-60.0396
41.2013	105		41.2013	126		41.2013	110		41.2037	357.512			41.2037	40049		41.2037	-13509.9		41.2037	1043.21	174.695	-58.8514	-462.614		41.2037	598.37	103.043	-2.18591	-55.7063
41.2145	118		41.2145	101		41.2145	116		41.2169	359.012			41.2169	41049		41.2169	-12443.2		41.2169	1049.21	149.195	-82.8514	-431.114		41.2169	625.037	98.0433	-8.18591	-63.0396
41.2276	120		41.2276	140		41.2276	127		41.23	357.812			41.23	39049		41.23	-9909.9		41.23	1055.21	152.195	-48.3514	-458.114		41.23	613.37	102.043	12.8141	-59.7063
41.2407	137		41.2407	102		41.2407	113		41.2431	357.512			41.2431	40549		41.2431	-10976.6		41.2431	1052.21	147.695	-103.851	-453.614		41.2431	625.037	95.5433	3.81409	-63.373
41.2539	136		41.2539	116		41.2539	119		41.2563	356.312			41.2563	41049		41.2563	-9643.24		41.2563	1088.21	158.195	-90.3514	-476.114		41.2563	615.037	96.0433	-14.1859	-70.0396
41.267	104		41.267	106		41.267	118		41.2694	355.412			41.2694	40299		41.2694	-11909.9		41.2694	1070.21	162.695	-93.3514	-438.614		41.2694	635.037	93.0433	-7.18591	-62.373
41.2801	116		41.2801	135		41.2801	112		41.2825	359.312			41.2825	42549		41.2825	-12843.2		41.2825	1073.21	179.195	-78.3514	-441.614		41.2825	606.703	104.043	-2.18591	-60.0396
41.2933	120		41.2933	132		41.2933	126		41.2957	359.612			41.2957	42299		41.2957	-8843.24		41.2957	1031.21	170.195	-67.8514	-432.614		41.2957	621.703	84.0433	-6.18591	-52.0396
41.3064	109		41.3064	137		41.3064	121		41.3088	360.212			41.3088	44049		41.3088	-11776.6		41.3088	1046.21	155.195	-124.851	-420.614		41.3088	621.703	98.0433	-6.68591	-55.7063
41.3195	113		41.3195	125		41.3195	118		41.3219	353.612			41.3219	39549		41.3219	-13109.9		41.3219	1055.21	153.695	-78.3514	-408.614		41.3219	643.37	95.5433	-8.68591	-52.0396
41.3327	133		41.3327	115		41.3327	109		41.3351	357.212			41.3351	37299		41.3351	-13109.9		41.3351	1067.21	159.695	-45.3514	-423.614		41.3351	621.703	100.043	-1.18591	-70.373
41.3458	118		41.3458	109		41.3458	80		41.3482	358.112			41.3482	42299		41.3482	-12176.6		41.3482	1061.21	158.195	-25.8514	-456.614		41.3482	608.37	91.0433	-2.18591	-56.373
41.3589	105		41.3589	122		41.3589	113		41.3613	354.812			41.3613	42049		41.3613	-8976.57		41.3613	1064.21	176.195	-34.8514	-458.114		41.3613	635.037	90.5433	-10.6859	-53.0396
41.3721	129		41.3721	134		41.3721	123		41.3745	355.712			41.3745	37299		41.3745	-11776.6		41.3745	1028.21	143.195	-12.3514	-413.114		41.3745	618.37	104.043	-1.68591	-62.0396
41.3852	92		41.3852	107		41.3852	114		41.3876	353.912			41.3876	42299		41.3876	-10043.2		41.3876	1061.21	128.195	-51.3514	-444.614		41.3876	631.703	97.5433	5.31409	-64.0396
41.3983	89		41.3983	108		41.3983	116		41.4007	353.312			41.4007	43299		41.4007	-10976.6		41.4007	1055.21	156.695	-73.8514	-420.614		41.4007	615.037	101.043	-13.6859	-57.7063
41.4114	85		41.4114	109		41.4114	120		41.4138	362.012			41.4138	41549		41.4138	-8309.9		41.4138	1037.21	146.195	-82.8514	-452.114		41.4138	605.037	97.5433	-23.1859	-63.373
41.4246	111		41.4246	110		41.4246	97		41.427	358.712			41.427	39299		41.427	-10576.6		41.427	1028.21	141.695	-82.8514	-437.114		41.427	616.703	90.0433	-10.1859	-66.7063
41.4377	115		41.4377	122		41.4377	125		41.4401	360.212			41.4401	39549		41.4401	-11376.6		41.4401	1061.21	137.195	-37.8514	-465.614		41.4401	640.037	93.0433	-7.68591	-50.373
41.4508	118		41.4508	98		41.4508	106		41.4532	361.112			41.4532	39299		41.4532	-11509.9		41.4532	1052.21	147.695	-79.8514	-438.614		41.4532	631.703	89.5433	-6.18591	-54.373
41.464	116		41.464	99		41.464	111		41.4664	358.412			41.4664	40299		41.4664	-7243.24		41.4664	1073.21	168.695	-103.851	-428.114		41.4664	640.037	105.543	-15.1859	-58.373
41.4771	137		41.4771	86		41.4771	120		41.4795	356.312			41.4795	39549		41.4795	-10443.2		41.4795	1055.21	159.695	-93.3514	-413.114		41.4795	618.37	97.0433	7.31409	-62.373
41.4902	125		41.4902	112		41.4902	110		41.4926	356.912			41.4926	42799		41.4926	-12176.6		41.4926	1019.21	156.695	-93.3514	-459.614		41.4926	621.703	91.5433	2.31409	-60.7063
41.5033	119		41.5033	137		41.5033	114		41.5057	359.612			41.5057	45799		41.5057	-14176.6		41.5057	1031.21	149.195	-84.3514	-456.614		41.5057	616.703	102.543	0.31409	-63.373
41.5165	141		41.5165	127		41.5165	119		41.5189	358.112			41.5189	39549		41.5189	-12843.2		41.5189	1052.21	141.695	-54.3514	-446.114		41.5189	620.037	81.0433	1.31409	-54.7063
41.5296	126		41.5296	123		41.5296	135		41.532	353.012			41.532	40549		41.532	-12709.9		41.532	1064.21	159.695	-66.3514	-431.114		41.532	598.37	97.5433	-2.18591	-63.7063
41.5427	99		41.5427	125		41.5427	109		41.5451	358.712			41.5451	41049		41.5451	-11909.9		41.5451	1049.21	191.195	-54.3514	-434.114		41.5451	630.037	90.0433	8.31409	-68.7063
41.5559	92		41.5559	106		41.5559	101		41.5583	360.512			41.5583	41299		41.5583	-11909.9		41.5583	1043.21	146.195	-40.8514	-410.114		41.5583	625.037	97.0433	-10.6859	-52.373
41.569	124		41.569	106		41.569	114		41.5714	358.712			41.5714	35549		41.5714	-10443.2		41.5714	1079.21	164.195	-90.3514	-432.614		41.5714	615.037	89.0433	-11.1859	-58.0396
41.5821	113		41.5821	108		41.5821	121		41.5845	357.812			41.5845	41299		41.5845	-14309.9		41.5845	1049.21	173.195	-129.351	-458.114		41.5845	638.37	96.5433	-1.68591	-60.0396
41.5953	129		41.5953	135		41.5953	127		41.5977	358.112			41.5977	39549		41.5977	-8309.9		41.5977	1085.21	155.195	-60.3514	-426.614		41.5977	613.37	96.5433	-1.68591	-64.0396
41.6084	131		41.6084	108		41.6084	112		41.6108	361.112			41.6108	38049		41.6108	-15109.9		41.6108	1034.21	135.695	-82.8514	-441.614		41.6108	641.703	96.0433	-9.18591	-60.7063
41.6215	123		41.6215	102		41.6215	105		41.6239	359.312			41.6239	43299		41.6239	-12443.2		41.6239	1043.21	167.195	-58.8514	-462.614		41.6239	606.703	92.5433	-9.18591	-61.373
41.6347	109		41.6347	111		41.6347	99		41.6371	360.212			41.6371	40049		41.6371	-7776.57		41.6371	1046.21	155.195	-51.3514	-428.114		41.6371	616.703	87.0433	-9.18591	-53.373
41.6478	98		41.6478	102		41.6478	107		41.6502	356.312			41.6502	44549		41.6502	-11643.2		41.6502	1064.21	152.195	-63.3514	-411.614		41.6502	623.37	91.5433	-13.6859	-64.373
41.6609	96		41.6609	130		41.6609	96		41.6633	359.612			41.6633	39799		41.6633	-12976.6		41.6633	1094.21	174.695	-130.851	-444.614		41.6633	631.703	90.0433	-10.1859	-70.0396
41.674	145		41.674	118		41.674	97		41.6764	358.112			41.6764	36299		41.6764	-10576.6		41.6764	1040.21	155.195	-105.351	-503.114		41.6764	631.703	82.0433	9.31409	-60.0396
41.6872	105		41.6872	141		41.6872	132		41.6896	354.512			41.6896	41549		41.6896	-12709.9		41.6896	1070.21	152.195	-120.351	-455.114		41.6896	616.703	99.0433	-0.18591	-61.7063
41.7003	129		41.7003	118		41.7003	103		41.7027	353.312			41.7027	42799		41.7027	-12843.2		41.7027	1052.21	132.695	-90.3514	-449.114		41.7027	613.37	80.5433	-5.68591	-61.7063
41.7134	111		41.7134	120		41.7134	118		41.7158	359.912			41.7158	44549		41.7158	-13776.6		41.7158	1061.21	134.195	-91.8514	-467.114		41.7158	630.037	93.0433	-5.68591	-60.373
41.7266	104		41.7266	111		41.7266	120		41.729	359.912			41.729	41049		41.729	-12576.6		41.729	1073.21	150.695	-60.3514	-459.614		41.729	618.37	102.543	-17.1859	-61.373
41.7397	101		41.7397	123		41.7397	87		41.7421	355.412			41.7421	40799		41.7421	-9776.57		41.7421	1037.21	152.195	-117.351	-426.614		41.7421	620.037	93.5433	-15.1859	-63.7063
41.7528	108		41.7528	134		41.7528	125		41.7552	357.212			41.7552	41299		41.7552	-12976.6		41.7552	1058.21	165.695	-72.3514	-384.614		41.7552	626.703	98.5433	-5.18591	-63.7063
41.766	125		41.766	112		41.766	125		41.7684	355.712			41.7684	39299		41.7684	-12176.6		41.7684	1046.21	150.695	-109.851	-456.614		41.7684	613.37	101.043	-9.18591	-61.373
41.7791	110		41.7791	127		41.7791	96		41.7815	355.712			41.7815	42799		41.7815	-9109.9		41.7815	1070.21	128.195	-139.851	-464.114		41.7815	600.037	90.5433	0.31409	-58.373
41.7922	120		41.7922	105		41.7922	120		41.7946	355.412			41.7946	42299		41.7946	-9509.9		41.7946	1010.21	128.195	-49.8514	-474.614		41.7946	620.037	90.0433	-5.68591	-53.0396
41.8053	109		41.8053	114		41.8053	131		41.8077	356.612			41.8077	43049		41.8077	-10576.6		41.8077	1055.21	153.695	-114.351	-494.114		41.8077	620.037	103.543	-11.6859	-73.0396
41.8185	123		41.8185	131		41.8185	98		41.8209	357.212			41.8209	41049		41.8209	-10443.2		41.8209	1061.21	140.195	-52.8514	-452.114		41.8209	606.703	83.5433	-10.6859	-68.7063
41.8316	107		41.8316	135		41.8316	125		41.834	356.612			41.834	38299		41.834	-13643.2		41.834	1064.21	173.195	-66.3514	-456.614		41.834	610.037	80.0433	-17.6859	-65.373
41.8447	124		41.8447	114		41.8447	133		41.8471	356.912			41.8471	41299		41.8471	-11776.6		41.8471	1007.21	153.695	-108.351	-441.614		41.8471	608.37	80.0433	-11.6859	-65.0396
41.8579	113		41.8579	127		41.8579	124		41.8603	357.212			41.8603	40049		41.8603	-9643.24		41.8603	1055.21	161.195	-123.351	-453.614		41.8603	621.703	79.5433	-16.1859	-65.373
41.871	136		41.871	145		41.871	109		41.8734	351.512			41.8734	39549		41.8734	-12576.6		41.8734	1082.21	162.695	-76.8514	-473.114		41.8734	641.703	86.5433	-9.18591	-56.373
41.8841	119		41.8841	106		41.8841	119		41.8865	354.212			41.8865	41049		41.8865	-10443.2		41.8865	1067.21	146.195	-141.351	-486.614		41.8865	618.37	98.0433	-3.18591	-60.0396
41.8973	119		41.8973	117		41.8973	96		41.8997	353.912			41.8997	41299		41.8997	-8709.9		41.8997	1058.21	119.195	-157.851	-458.114		41.8997	621.703	83.5433	-14.1859	-66.7063
41.9104	120		41.9104	131		41.9104	119		41.9128	359.312			41.9128	43299		41.9128	-10309.9		41.9128	1064.21	114.695	-79.8514	-464.114		41.9128	618.37	91.5433	-15.6859	-60.0396
41.9235	120		41.9235	119		41.9235	92		41.9259	358.112			41.9259	40549		41.9259	-9509.9		41.9259	1037.21	177.695	-124.851	-471.614		41.9259	630.037	103.543	-12.6859	-61.7063
41.9367	93		41.9367	108		41.9367	119		41.9391	356.012			41.9391	42049		41.9391	-13909.9		41.9391	1043.21	153.695	-94.8514	-471.614		41.9391	633.37	99.0433	-6.18591	-59.7063
41.9498	117		41.9498	101		41.9498	109		41.9522	356.012			41.9522	38549		41.9522	-10709.9		41.9522	1043.21	143.195	-108.351	-420.614		41.9522	621.703	96.5433	4.81409	-62.7063
41.9629	112		41.9629	128		41.9629	96		41.9653	359.612			41.9653	40299		41.9653	-13776.6		41.9653	1067.21	134.195	-69.3514	-471.614		41.9653	616.703	87.5433	-21.1859	-64.0396
41.976	102		41.976	113		41.976	95		41.9784	356.612			41.9784	37299		41.9784	-10576.6		41.9784	1055.21	146.195	-58.8514	-447.614		41.9784	631.703	88.0433	-25.1859	-70.373
41.9892	116		41.9892	122		41.9892	109		41.9916	356.312			41.9916	44799		41.9916	-15243.2		41.9916	1049.21	150.695	-85.8514	-477.614		41.9916	640.037	108.043	-18.6859	-65.373
42.0023	118		42.0023	112		42.0023	126		42.0047	354.512			42.0047	39299		42.0047	-15909.9		42.0047	1058.21	137.195	-106.851	-462.614		42.0047	626.703	80.5433	-19.6859	-57.7063
42.0154	104		42.0154	116		42.0154	90		42.0178	357.212			42.0178	39049		42.0178	-11509.9		42.0178	1103.21	134.195	-150.351	-459.614		42.0178	631.703	81.0433	-6.18591	-59.7063
42.0286	107		42.0286	116		42.0286	136		42.031	357.212			42.031	43299		42.031	-12043.2		42.031	1064.21	182.195	-73.8514	-467.114		42.031	600.037	85.5433	-5.68591	-59.373
42.0417	133		42.0417	106		42.0417	115		42.0441	349.412			42.0441	38799		42.0441	-9376.57		42.0441	1064.21	158.195	-79.8514	-419.114		42.0441	633.37	89.5433	-3.68591	-60.373
42.0548	111		42.0548	113		42.0548	108		42.0572	356.312			42.0572	45049		42.0572	-12843.2		42.0572	1070.21	123.695	-117.351	-471.614		42.0572	608.37	102.043	-7.18591	-63.7063
42.068	128		42.068	94		42.068	82		42.0703	357.212			42.0703	41799		42.0703	-10843.2		42.0703	1037.21	135.695	-123.351	-470.114		42.0703	628.37	83.5433	-2.18591	-58.7063
42.0811	111		42.0811	119		42.0811	103		42.0835	349.712			42.0835	41299		42.0835	-12043.2		42.0835	1055.21	159.695	-117.351	-423.614		42.0835	615.037	93.0433	-15.1859	-61.373
42.0942	114		42.0942	101		42.0942	113		42.0966	359.312			42.0966	43549		42.0966	-10443.2		42.0966	1064.21	137.195	-118.851	-468.614		42.0966	616.703	99.5433	-12.6859	-63.7063
42.1073	119		42.1073	110		42.1073	112		42.1097	357.512			42.1097	40299		42.1097	-12309.9		42.1097	1025.21	162.695	-69.3514	-465.614		42.1097	631.703	86.5433	-3.68591	-72.7063
42.1205	103		42.1205	119		42.1205	105		42.1229	353.912			42.1229	37049		42.1229	-11509.9		42.1229	1064.21	128.195	-135.351	-471.614		42.1229	613.37	82.5433	-11.6859	-66.0396
42.1336	104		42.1336	97		42.1336	98		42.136	350.012			42.136	45549		42.136	-13509.9		42.136	1061.21	132.695	-82.8514	-443.114		42.136	620.037	85.0433	-10.6859	-55.373
42.1467	124		42.1467	107		42.1467	88		42.1491	355.412			42.1491	37549		42.1491	-10443.2		42.1491	1070.21	143.195	-144.351	-446.114		42.1491	628.37	90.5433	-13.1859	-55.0396
42.1599	123		42.1599	99		42.1599	110		42.1623	355.112			42.1623	37549		42.1623	-12043.2		42.1623	1079.21	146.195	-108.351	-443.114		42.1623	621.703	89.5433	-17.1859	-64.7063
42.173	125		42.173	112		42.173	113		42.1754	360.212			42.1754	38799		42.1754	-10976.6		42.1754	1112.21	143.195	-93.3514	-443.114		42.1754	633.37	98.0433	-12.6859	-59.7063
42.1861	116		42.1861	125		42.1861	130		42.1885	355.412			42.1885	41299		42.1885	-11909.9		42.1885	1046.21	138.695	-120.351	-468.614		42.1885	636.703	85.5433	-15.1859	-62.0396
42.1993	101		42.1993	111		42.1993	108		42.2017	353.612			42.2017	42549		42.2017	-12576.6		42.2017	1055.21	162.695	-93.3514	-449.114		42.2017	626.703	90.0433	-8.68591	-68.0396
42.2124	82		42.2124	121		42.2124	111		42.2148	354.512			42.2148	44299		42.2148	-14976.6		42.2148	1037.21	143.195	-120.351	-455.114		42.2148	633.37	83.5433	-11.6859	-62.7063
42.2255	93		42.2255	99		42.2255	118		42.2279	352.712			42.2279	40299		42.2279	-10176.6		42.2279	1046.21	153.695	-55.8514	-476.114		42.2279	626.703	95.5433	-21.6859	-63.7063
42.2386	116		42.2386	95		42.2386	127		42.2411	355.412			42.2411	41549		42.2411	-11509.9		42.2411	1043.21	138.695	-126.351	-465.614		42.2411	616.703	91.0433	-15.6859	-69.373
42.2518	101		42.2518	122		42.2518	103		42.2542	351.812			42.2542	37299		42.2542	-11776.6		42.2542	1043.21	125.195	-103.851	-453.614		42.2542	613.37	102.043	-19.6859	-64.373
42.2649	122		42.2649	120		42.2649	103		42.2673	357.212			42.2673	38049		42.2673	-11243.2		42.2673	1055.21	132.695	-117.351	-408.614		42.2673	605.037	92.5433	-8.18591	-57.7063
42.278	106		42.278	116		42.278	122		42.2804	353.012			42.2804	38549		42.2804	-9243.24		42.2804	1040.21	168.695	-94.8514	-467.114		42.2804	628.37	87.5433	-16.6859	-65.373
42.2912	101		42.2912	131		42.2912	99		42.2936	352.712			42.2936	42299		42.2936	-16176.6		42.2936	1064.21	138.695	-75.3514	-483.614		42.2936	638.37	89.0433	-22.6859	-66.0396
42.3043	121		42.3043	101		42.3043	112		42.3067	356.012			42.3067	41549		42.3067	-12709.9		42.3067	1049.21	140.195	-133.851	-494.114		42.3067	625.037	80.0433	-23.6859	-61.373
42.3174	107		42.3174	116		42.3174	98		42.3198	352.112			42.3198	44799		42.3198	-15909.9		42.3198	1064.21	150.695	-91.8514	-467.114		42.3198	620.037	89.5433	-9.68591	-70.373
42.3306	119		42.3306	102		42.3306	127		42.333	355.712			42.333	41799		42.333	-15376.6		42.333	1046.21	135.695	-127.851	-491.114		42.333	613.37	94.0433	-11.1859	-56.373
42.3437	104		42.3437	118		42.3437	118		42.3461	356.912			42.3461	38299		42.3461	-11776.6		42.3461	1043.21	137.195	-117.351	-429.614		42.3461	621.703	75.5433	-18.1859	-72.0396
42.3568	102		42.3568	114		42.3568	116		42.3592	356.912			42.3592	41549		42.3592	-14309.9		42.3592	1064.21	128.195	-105.351	-453.614		42.3592	610.037	89.0433	-17.6859	-57.0396
42.37	103		42.37	140		42.37	121		42.3723	357.512			42.3723	37799		42.3723	-10443.2		42.3723	1055.21	134.195	-144.351	-459.614		42.3723	630.037	77.0433	-21.6859	-63.7063
42.3831	104		42.3831	128		42.3831	109		42.3855	355.412			42.3855	39049		42.3855	-16043.2		42.3855	1064.21	162.695	-114.351	-443.114		42.3855	625.037	84.5433	-21.1859	-70.0396
42.3962	106		42.3962	114		42.3962	98		42.3986	353.912			42.3986	42049		42.3986	-6976.57		42.3986	1073.21	153.695	-76.8514	-510.614		42.3986	610.037	83.0433	-12.6859	-60.373
42.4093	134		42.4093	102		42.4093	108		42.4117	356.912			42.4117	39299		42.4117	-13909.9		42.4117	1058.21	153.695	-67.8514	-473.114		42.4117	628.37	81.5433	-24.6859	-66.0396
42.4225	115		42.4225	122		42.4225	113		42.4249	355.712			42.4249	38049		42.4249	-14043.2		42.4249	1073.21	168.695	-121.851	-513.614		42.4249	621.703	79.5433	-8.68591	-60.0396
42.4356	120		42.4356	130		42.4356	119		42.438	352.412			42.438	41299		42.438	-11109.9		42.438	1049.21	146.195	-58.8514	-480.614		42.438	621.703	97.0433	-5.18591	-67.373
42.4487	119		42.4487	106		42.4487	103		42.4511	356.612			42.4511	40299		42.4511	-14709.9		42.4511	1016.21	131.195	-135.351	-441.614		42.4511	620.037	86.0433	-16.6859	-59.7063
42.4619	116		42.4619	105		42.4619	110		42.4643	353.612			42.4643	36799		42.4643	-9643.24		42.4643	1049.21	137.195	-148.851	-482.114		42.4643	618.37	86.5433	-14.6859	-58.373
42.475	113		42.475	114		42.475	102		42.4774	352.412			42.4774	42299		42.4774	-11909.9		42.4774	1058.21	126.695	-93.3514	-497.114		42.4774	640.037	95.5433	-17.6859	-66.373
42.4881	101		42.4881	102		42.4881	95		42.4905	354.512			42.4905	39049		42.4905	-11643.2		42.4905	1016.21	152.195	-130.851	-452.114		42.4905	623.37	88.5433	-17.1859	-68.7063
42.5012	116		42.5012	91		42.5012	104		42.5037	353.912			42.5037	38799		42.5037	-14576.6		42.5037	1031.21	152.195	-108.351	-440.114		42.5037	631.703	79.0433	-16.6859	-60.7063
42.5144	112		42.5144	107		42.5144	102		42.5168	359.012			42.5168	41299		42.5168	-7509.9		42.5168	1031.21	141.695	-123.351	-488.114		42.5168	610.037	94.5433	-17.6859	-60.7063
42.5275	106		42.5275	111		42.5275	111		42.5299	358.412			42.5299	39549		42.5299	-12443.2		42.5299	1037.21	152.195	-127.851	-456.614		42.5299	638.37	82.5433	-15.1859	-57.0396
42.5406	117		42.5406	115		42.5406	121		42.543	350.912			42.543	39299		42.543	-13376.6		42.543	1049.21	138.695	-138.351	-468.614		42.543	626.703	99.5433	-13.1859	-61.373
42.5538	121		42.5538	107		42.5538	125		42.5562	353.012			42.5562	39049		42.5562	-14176.6		42.5562	1052.21	158.195	-57.3514	-489.614		42.5562	628.37	92.0433	-11.1859	-63.0396
42.5669	117		42.5669	103		42.5669	97		42.5693	354.812			42.5693	43299		42.5693	-14043.2		42.5693	1040.21	159.695	-154.851	-459.614		42.5693	615.037	89.0433	-25.1859	-64.373
42.58	109		42.58	102		42.58	110		42.5824	353.912			42.5824	37549		42.5824	-12443.2		42.5824	1058.21	123.695	-138.351	-488.114		42.5824	650.037	85.0433	-3.68591	-66.0396
42.5932	103		42.5932	112		42.5932	103		42.5956	350.912			42.5956	41549		42.5956	-13509.9		42.5956	1067.21	132.695	-109.851	-488.114		42.5956	620.037	87.5433	-17.1859	-59.373
42.6063	100		42.6063	107		42.6063	111		42.6087	353.912			42.6087	42799		42.6087	-16043.2		42.6087	1010.21	156.695	-87.3514	-509.114		42.6087	611.703	75.5433	-11.1859	-69.373
42.6194	109		42.6194	123		42.6194	108		42.6218	354.512			42.6218	38799		42.6218	-13376.6		42.6218	1046.21	177.695	-91.8514	-455.114		42.6218	636.703	84.5433	-7.18591	-55.0396
42.6326	115		42.6326	108		42.6326	98		42.635	353.912			42.635	48549		42.635	-19509.9		42.635	1046.21	149.195	-148.851	-504.614		42.635	618.37	85.5433	-19.1859	-61.0396
42.6457	107		42.6457	106		42.6457	107		42.6481	353.312			42.6481	41799		42.6481	-14576.6		42.6481	1031.21	114.695	-165.351	-459.614		42.6481	625.037	81.5433	-15.1859	-66.0396
42.6588	103		42.6588	123		42.6588	100		42.6612	354.812			42.6612	42049		42.6612	-13776.6		42.6612	1073.21	161.195	-109.851	-447.614		42.6612	610.037	86.0433	-17.6859	-60.373
42.672	110		42.672	114		42.672	114		42.6743	355.412			42.6743	40049		42.6743	-12443.2		42.6743	1037.21	128.195	-139.851	-527.114		42.6743	618.37	85.5433	-25.6859	-59.373
42.6851	87		42.6851	99		42.6851	109		42.6875	354.812			42.6875	41049		42.6875	-11643.2		42.6875	1058.21	122.195	-109.851	-495.614		42.6875	628.37	95.0433	-9.68591	-61.7063
42.6982	114		42.6982	115		42.6982	99		42.7006	356.312			42.7006	36049		42.7006	-14576.6		42.7006	1070.21	140.195	-139.851	-494.114		42.7006	603.37	83.5433	-20.1859	-60.0396
42.7113	113		42.7113	88		42.7113	90		42.7137	352.412			42.7137	38049		42.7137	-14843.2		42.7137	1055.21	147.695	-133.851	-447.614		42.7137	628.37	90.0433	-18.1859	-71.0396
42.7245	124		42.7245	121		42.7245	83		42.7269	359.912			42.7269	37299		42.7269	-11776.6		42.7269	1061.21	125.195	-115.851	-480.614		42.7269	606.703	79.5433	-9.18591	-61.7063
42.7376	113		42.7376	110		42.7376	85		42.74	352.412			42.74	37299		42.74	-14976.6		42.74	1049.21	132.695	-57.3514	-474.614		42.74	610.037	86.0433	-23.6859	-58.0396
42.7507	112		42.7507	113		42.7507	109		42.7531	354.212			42.7531	39049		42.7531	-13909.9		42.7531	1049.21	129.695	-90.3514	-479.114		42.7531	623.37	87.5433	-13.1859	-63.0396
42.7639	135		42.7639	115		42.7639	117		42.7663	349.412			42.7663	42049		42.7663	-12709.9		42.7663	1082.21	143.195	-159.351	-473.114		42.7663	613.37	79.0433	-14.1859	-70.373
42.777	129		42.777	108		42.777	105		42.7794	351.812			42.7794	34299		42.7794	-13376.6		42.7794	1049.21	146.195	-136.851	-491.114		42.7794	623.37	83.5433	-12.1859	-74.7063
42.7901	124		42.7901	89		42.7901	106		42.7925	354.512			42.7925	39049		42.7925	-12976.6		42.7925	1025.21	149.195	-111.351	-492.614		42.7925	620.037	96.5433	-12.1859	-61.373
42.8032	114		42.8032	97		42.8032	96		42.8056	351.812			42.8056	39299		42.8056	-14709.9		42.8056	1049.21	146.195	-123.351	-477.614		42.8056	615.037	82.0433	-15.1859	-71.7063
42.8164	118		42.8164	117		42.8164	105		42.8188	353.612			42.8188	42049		42.8188	-16176.6		42.8188	1043.21	140.195	-138.351	-464.114		42.8188	616.703	78.5433	-20.6859	-66.373
42.8295	89		42.8295	104		42.8295	112		42.8319	355.112			42.8319	39299		42.8319	-12309.9		42.8319	1049.21	122.195	-138.351	-441.614		42.8319	613.37	73.0433	-18.1859	-64.0396
42.8426	97		42.8426	97		42.8426	99		42.845	355.712			42.845	42299		42.845	-12576.6		42.845	1055.21	149.195	-136.851	-453.614		42.845	628.37	80.5433	-3.18591	-71.7063
42.8558	100		42.8558	94		42.8558	124		42.8582	353.912			42.8582	40299		42.8582	-12443.2		42.8582	1067.21	122.195	-78.3514	-434.114		42.8582	623.37	85.0433	-12.1859	-60.7063
42.8689	96		42.8689	114		42.8689	108		42.8713	356.312			42.8713	39799		42.8713	-10976.6		42.8713	1043.21	152.195	-169.851	-459.614		42.8713	611.703	85.0433	-19.1859	-60.7063
42.882	105		42.882	103		42.882	115		42.8844	357.212			42.8844	40049		42.8844	-13376.6		42.8844	1064.21	149.195	-132.351	-453.614		42.8844	625.037	73.0433	-20.6859	-64.373
42.8952	109		42.8952	87		42.8952	78		42.8976	356.912			42.8976	32299		42.8976	-13243.2		42.8976	1052.21	162.695	-84.3514	-471.614		42.8976	608.37	80.0433	-20.1859	-76.373
42.9083	115		42.9083	88		42.9083	110		42.9107	356.312			42.9107	38549		42.9107	-12309.9		42.9107	1085.21	144.695	-84.3514	-462.614		42.9107	615.037	73.5433	-17.1859	-70.7063
42.9214	95		42.9214	109		42.9214	103		42.9238	353.912			42.9238	40049		42.9238	-15109.9		42.9238	1043.21	102.695	-141.351	-498.614		42.9238	633.37	77.5433	-27.1859	-64.373
42.9346	104		42.9346	107		42.9346	101		42.937	352.412			42.937	39049		42.937	-13909.9		42.937	1046.21	141.695	-121.851	-480.614		42.937	621.703	85.5433	-20.1859	-67.0396
42.9477	118		42.9477	106		42.9477	129		42.9501	356.912			42.9501	42549		42.9501	-11376.6		42.9501	1019.21	128.195	-114.351	-468.614		42.9501	603.37	82.5433	-23.1859	-70.0396
42.9608	103		42.9608	108		42.9608	101		42.9632	353.312			42.9632	43799		42.9632	-12043.2		42.9632	1091.21	122.195	-132.351	-482.114		42.9632	605.037	92.5433	-22.1859	-65.7063
42.9739	96		42.9739	113		42.9739	97		42.9763	350.312			42.9763	39049		42.9763	-14309.9		42.9763	1043.21	123.695	-144.351	-423.614		42.9763	618.37	92.5433	-13.6859	-66.7063
42.9871	118		42.9871	115		42.9871	91		42.9895	359.312			42.9895	43299		42.9895	-15243.2		42.9895	1031.21	117.695	-109.851	-476.114		42.9895	625.037	87.5433	-11.1859	-64.373
43.0002	101		43.0002	110		43.0002	94		43.0026	351.812			43.0026	40799		43.0026	-14576.6		43.0026	1061.21	135.695	-126.351	-486.614		43.0026	610.037	81.0433	-9.18591	-66.7063
43.0133	89		43.0133	128		43.0133	99		43.0157	351.812			43.0157	41299		43.0157	-12976.6		43.0157	1061.21	132.695	-118.851	-476.114		43.0157	636.703	84.0433	-16.1859	-57.7063
43.0265	101		43.0265	113		43.0265	101		43.0289	350.312			43.0289	39549		43.0289	-13109.9		43.0289	1034.21	126.695	-141.351	-494.114		43.0289	621.703	84.5433	-14.6859	-61.7063
43.0396	114		43.0396	110		43.0396	117		43.042	351.812			43.042	41299		43.042	-14443.2		43.042	1076.21	117.695	-138.351	-521.114		43.042	613.37	83.5433	-12.6859	-71.0396
43.0527	124		43.0527	102		43.0527	124		43.0551	355.112			43.0551	40299		43.0551	-11643.2		43.0551	1076.21	170.195	-166.851	-438.614		43.0551	620.037	79.0433	-22.1859	-62.7063
43.0658	117		43.0658	107		43.0658	87		43.0682	354.512			43.0682	37799		43.0682	-11109.9		43.0682	1043.21	131.195	-123.351	-453.614		43.0682	625.037	93.5433	-18.6859	-65.373
43.079	121		43.079	115		43.079	101		43.0814	353.012			43.0814	39299		43.0814	-11776.6		43.0814	1058.21	147.695	-103.851	-494.114		43.0814	651.703	76.5433	-24.6859	-60.373
43.0921	116		43.0921	97		43.0921	94		43.0945	352.712			43.0945	38049		43.0945	-14043.2		43.0945	1076.21	137.195	-151.851	-518.114		43.0945	615.037	80.5433	-20.1859	-65.0396
43.1052	109		43.1052	96		43.1052	103		43.1076	353.612			43.1076	35799		43.1076	-14576.6		43.1076	1049.21	137.195	-121.851	-489.614		43.1076	631.703	90.5433	-16.6859	-61.373
43.1184	104		43.1184	107		43.1184	89		43.1208	352.412			43.1208	41799		43.1208	-18309.9		43.1208	1031.21	131.195	-127.851	-500.114		43.1208	626.703	85.0433	-24.6859	-65.373
43.1315	110		43.1315	108		43.1315	86		43.1339	356.012			43.1339	41549		43.1339	-16709.9		43.1339	1022.21	147.695	-144.351	-447.614		43.1339	621.703	80.0433	-11.6859	-67.373
43.1446	117		43.1446	101		43.1446	113		43.147	351.812			43.147	38049		43.147	-13909.9		43.147	1040.21	149.195	-156.351	-500.114		43.147	626.703	82.5433	-19.6859	-72.7063
43.1578	116		43.1578	101		43.1578	88		43.1602	352.412			43.1602	38299		43.1602	-13376.6		43.1602	1046.21	143.195	-147.351	-479.114		43.1602	628.37	66.5433	-24.1859	-66.0396
43.1709	117		43.1709	93		43.1709	83		43.1733	353.012			43.1733	39049		43.1733	-12976.6		43.1733	1058.21	116.195	-165.351	-476.114		43.1733	618.37	76.5433	-21.1859	-61.373
43.184	92		43.184	119		43.184	91		43.1864	353.612			43.1864	37299		43.1864	-11776.6		43.1864	1046.21	134.195	-120.351	-486.614		43.1864	626.703	79.0433	-25.1859	-63.373
43.1972	117		43.1972	110		43.1972	120		43.1996	356.912			43.1996	41299		43.1996	-14309.9		43.1996	1037.21	134.195	-159.351	-486.614		43.1996	623.37	67.0433	-27.6859	-67.0396
43.2103	118		43.2103	99		43.2103	117		43.2127	354.212			43.2127	38299		43.2127	-15109.9		43.2127	1016.21	125.195	-112.851	-488.114		43.2127	615.037	71.0433	-23.6859	-59.7063
43.2234	106		43.2234	111		43.2234	97		43.2258	353.612			43.2258	36549		43.2258	-14043.2		43.2258	1082.21	132.695	-117.351	-491.114		43.2258	621.703	84.0433	-15.6859	-65.7063
43.2366	104		43.2366	99		43.2366	104		43.239	355.712			43.239	40299		43.239	-12843.2		43.239	1019.21	152.195	-135.351	-500.114		43.239	625.037	83.0433	-10.1859	-65.7063
43.2497	97		43.2497	117		43.2497	107		43.2521	351.212			43.2521	42049		43.2521	-13109.9		43.2521	1046.21	138.695	-156.351	-474.614		43.2521	621.703	79.5433	-25.1859	-64.7063
43.2628	128		43.2628	109		43.2628	99		43.2652	353.012			43.2652	40799		43.2652	-13109.9		43.2652	1073.21	149.195	-174.351	-476.114		43.2652	625.037	83.0433	-19.1859	-74.373
43.2759	123		43.2759	101		43.2759	107		43.2783	350.612			43.2783	40299		43.2783	-14976.6		43.2783	1052.21	125.195	-108.351	-489.614		43.2783	625.037	78.5433	-25.6859	-64.0396
43.2891	100		43.2891	100		43.2891	93		43.2915	350.912			43.2915	40549		43.2915	-10309.9		43.2915	1052.21	137.195	-133.851	-476.114		43.2915	616.703	79.5433	-28.6859	-69.7063
43.3022	109		43.3022	103		43.3022	93		43.3046	355.112			43.3046	38049		43.3046	-13509.9		43.3046	1016.21	135.695	-132.351	-497.114		43.3046	621.703	86.0433	-29.6859	-65.0396
43.3153	133		43.3153	119		43.3153	110		43.3177	353.012			43.3177	36549		43.3177	-16443.2		43.3177	1094.21	125.195	-123.351	-498.614		43.3177	641.703	74.5433	-19.1859	-70.373
43.3285	128		43.3285	102		43.3285	122		43.3309	350.012			43.3309	38299		43.3309	-16443.2		43.3309	1055.21	129.695	-174.351	-495.614		43.3309	628.37	78.5433	-25.6859	-64.7063
43.3416	128		43.3416	125		43.3416	98		43.344	354.212			43.344	39549		43.344	-14043.2		43.344	1073.21	132.695	-130.851	-516.614		43.344	621.703	77.0433	-26.6859	-67.7063
43.3547	104		43.3547	126		43.3547	118		43.3571	354.812			43.3571	41049		43.3571	-15243.2		43.3571	1061.21	141.695	-139.851	-480.614		43.3571	635.037	85.5433	-18.1859	-72.7063
43.3678	102		43.3678	109		43.3678	126		43.3702	355.712			43.3702	38799		43.3702	-16709.9		43.3702	1052.21	126.695	-190.851	-489.614		43.3702	630.037	85.0433	-17.1859	-66.373
43.381	110		43.381	105		43.381	108		43.3834	351.812			43.3834	38299		43.3834	-12709.9		43.3834	1067.21	131.195	-129.351	-509.114		43.3834	605.037	91.0433	-29.6859	-64.0396
43.3941	123		43.3941	110		43.3941	107		43.3965	359.012			43.3965	35799		43.3965	-12309.9		43.3965	1055.21	126.695	-106.851	-513.614		43.3965	623.37	79.0433	-18.1859	-72.0396
43.4072	98		43.4072	126		43.4072	92		43.4096	357.512			43.4096	39299		43.4096	-16843.2		43.4096	1061.21	134.195	-150.351	-446.114		43.4096	623.37	78.0433	-23.6859	-67.7063
43.4204	93		43.4204	95		43.4204	117		43.4228	353.012			43.4228	40549		43.4228	-13509.9		43.4228	1046.21	113.195	-178.851	-486.614		43.4228	626.703	75.5433	-20.6859	-65.7063
43.4335	112		43.4335	107		43.4335	97		43.4359	355.112			43.4359	37049		43.4359	-15376.6		43.4359	1055.21	135.695	-157.851	-474.614		43.4359	653.37	73.0433	-30.6859	-64.7063
43.4466	115		43.4466	105		43.4466	115		43.449	356.612			43.449	40049		43.449	-12709.9		43.449	1043.21	132.695	-168.351	-501.614		43.449	615.037	85.5433	-19.1859	-69.7063
43.4598	118		43.4598	107		43.4598	120		43.4622	352.412			43.4622	39049		43.4622	-11909.9		43.4622	1055.21	122.195	-117.351	-489.614		43.4622	618.37	82.0433	-8.68591	-69.373
43.4729	121		43.4729	107		43.4729	112		43.4753	355.412			43.4753	37299		43.4753	-12976.6		43.4753	1064.21	134.195	-136.851	-506.114		43.4753	606.703	85.0433	-28.1859	-63.7063
43.486	115		43.486	104		43.486	88		43.4884	356.612			43.4884	41049		43.4884	-12576.6		43.4884	1025.21	122.195	-159.351	-483.614		43.4884	616.703	81.0433	-27.6859	-64.0396
43.4992	107		43.4992	98		43.4992	107		43.5016	360.212			43.5016	41299		43.5016	-14709.9		43.5016	1028.21	117.695	-132.351	-509.114		43.5016	626.703	92.0433	-19.1859	-69.0396
43.5123	124		43.5123	117		43.5123	91		43.5147	352.712			43.5147	42299		43.5147	-16176.6		43.5147	1043.21	114.695	-147.351	-473.114		43.5147	618.37	81.0433	-19.6859	-71.373
43.5254	95		43.5254	105		43.5254	86		43.5278	360.512			43.5278	37299		43.5278	-14443.2		43.5278	1058.21	143.195	-144.351	-479.114		43.5278	626.703	76.5433	-17.1859	-62.7063
43.5385	117		43.5385	107		43.5385	113		43.5409	354.812			43.5409	38049		43.5409	-14709.9		43.5409	1055.21	135.695	-147.351	-504.614		43.5409	620.037	80.0433	-24.1859	-67.7063
43.5517	123		43.5517	89		43.5517	107		43.5541	351.512			43.5541	40049		43.5541	-14309.9		43.5541	1070.21	147.695	-189.351	-491.114		43.5541	613.37	69.0433	-17.1859	-73.7063
43.5648	104		43.5648	115		43.5648	90		43.5672	361.112			43.5672	39299		43.5672	-17509.9		43.5672	1067.21	150.695	-202.851	-504.614		43.5672	620.037	78.5433	-19.6859	-75.373
43.5779	108		43.5779	105		43.5779	91		43.5803	353.912			43.5803	39549		43.5803	-14043.2		43.5803	1058.21	102.695	-147.351	-494.114		43.5803	608.37	89.0433	-15.1859	-71.7063
43.5911	113		43.5911	102		43.5911	102		43.5935	356.012			43.5935	41299		43.5935	-12843.2		43.5935	1049.21	138.695	-159.351	-510.614		43.5935	620.037	91.0433	-31.1859	-60.373
43.6042	114		43.6042	118		43.6042	122		43.6066	355.412			43.6066	39549		43.6066	-13376.6		43.6066	1013.21	128.195	-144.351	-465.614		43.6066	626.703	77.5433	-23.1859	-68.7063
43.6173	117		43.6173	106		43.6173	117		43.6197	351.812			43.6197	37549		43.6197	-18443.2		43.6197	1049.21	125.195	-108.351	-495.614		43.6197	625.037	77.5433	-31.6859	-63.0396
43.6305	111		43.6305	105		43.6305	99		43.6329	354.812			43.6329	42299		43.6329	-12043.2		43.6329	1058.21	117.695	-172.851	-485.114		43.6329	608.37	74.0433	-14.1859	-71.373
43.6436	114		43.6436	111		43.6436	111		43.646	356.612			43.646	40799		43.646	-15643.2		43.646	1058.21	120.695	-169.851	-476.114		43.646	615.037	83.0433	-22.1859	-65.7063
43.6567	109		43.6567	102		43.6567	108		43.6591	359.012			43.6591	37049		43.6591	-16176.6		43.6591	1001.21	119.195	-180.351	-492.614		43.6591	618.37	76.5433	-31.1859	-66.373
43.6698	91		43.6698	100		43.6698	102		43.6722	359.312			43.6722	43049		43.6722	-16443.2		43.6722	1076.21	131.195	-144.351	-516.614		43.6722	620.037	76.0433	-22.1859	-60.373
43.683	112		43.683	127		43.683	96		43.6854	354.812			43.6854	37549		43.6854	-12309.9		43.6854	1052.21	117.695	-144.351	-522.614		43.6854	623.37	74.5433	-24.1859	-68.373
43.6961	115		43.6961	115		43.6961	104		43.6985	358.412			43.6985	42049		43.6985	-12576.6		43.6985	1067.21	134.195	-165.351	-485.114		43.6985	613.37	76.5433	-26.6859	-74.0396
43.7092	116		43.7092	101		43.7092	106		43.7116	358.412			43.7116	40049		43.7116	-16443.2		43.7116	1040.21	149.195	-123.351	-500.114		43.7116	613.37	69.0433	-19.6859	-72.0396
43.7224	83		43.7224	111		43.7224	95		43.7248	352.712			43.7248	37799		43.7248	-14843.2		43.7248	1049.21	120.695	-148.851	-474.614		43.7248	625.037	80.5433	-16.1859	-65.0396
43.7355	109		43.7355	114		43.7355	113		43.7379	359.612			43.7379	37799		43.7379	-15509.9		43.7379	1043.21	135.695	-159.351	-497.114		43.7379	610.037	81.0433	-14.6859	-66.373
43.7486	99		43.7486	118		43.7486	109		43.751	355.112			43.751	41299		43.751	-13643.2		43.751	1076.21	131.195	-165.351	-474.614		43.751	620.037	78.5433	-21.1859	-77.7063
43.7618	110		43.7618	95		43.7618	98		43.7642	354.812			43.7642	45049		43.7642	-19776.6		43.7642	1070.21	131.195	-150.351	-516.614		43.7642	611.703	78.0433	-22.1859	-74.0396
43.7749	98		43.7749	108		43.7749	109		43.7773	357.812			43.7773	39799		43.7773	-15109.9		43.7773	1061.21	131.195	-187.851	-473.114		43.7773	633.37	95.5433	-32.1859	-74.0396
43.788	97		43.788	109		43.788	110		43.7904	357.512			43.7904	37299		43.7904	-15243.2		43.7904	1025.21	138.695	-190.851	-465.614		43.7904	616.703	75.0433	-16.1859	-60.373
43.8011	126		43.8011	119		43.8011	105		43.8036	354.812			43.8036	40799		43.8036	-15643.2		43.8036	1052.21	131.195	-108.351	-486.614		43.8036	618.37	76.0433	-35.6859	-65.373
43.8143	126		43.8143	115		43.8143	106		43.8167	358.412			43.8167	36299		43.8167	-17776.6		43.8167	1055.21	122.195	-120.351	-500.114		43.8167	593.37	75.0433	-28.1859	-61.373
43.8274	105		43.8274	113		43.8274	73		43.8298	354.812			43.8298	39049		43.8298	-15243.2		43.8298	1046.21	120.695	-156.351	-492.614		43.8298	613.37	76.5433	-15.6859	-66.373
43.8405	116		43.8405	103		43.8405	86		43.8429	358.112			43.8429	38799		43.8429	-12309.9		43.8429	1034.21	117.695	-129.351	-462.614		43.8429	631.703	68.0433	-27.6859	-73.373
43.8537	75		43.8537	109		43.8537	81		43.8561	354.212			43.8561	42049		43.8561	-15643.2		43.8561	1085.21	132.695	-162.351	-504.614		43.8561	620.037	69.5433	-24.1859	-68.7063
43.8668	91		43.8668	119		43.8668	112		43.8692	359.612			43.8692	42299		43.8692	-14043.2		43.8692	1034.21	123.695	-147.351	-491.114		43.8692	610.037	82.5433	-18.1859	-69.373
43.8799	120		43.8799	115		43.8799	112		43.8823	356.012			43.8823	40299		43.8823	-13776.6		43.8823	1046.21	129.695	-153.351	-489.614		43.8823	626.703	83.5433	-20.1859	-61.373
43.8931	95		43.8931	97		43.8931	119		43.8955	353.012			43.8955	39799		43.8955	-13909.9		43.8955	1055.21	141.695	-166.851	-470.114		43.8955	635.037	80.5433	-12.1859	-72.7063
43.9062	89		43.9062	107		43.9062	118		43.9086	358.112			43.9086	42799		43.9086	-12976.6		43.9086	1073.21	125.195	-181.851	-522.614		43.9086	635.037	82.5433	-20.6859	-70.373
43.9193	90		43.9193	118		43.9193	114		43.9217	357.812			43.9217	40299		43.9217	-14443.2		43.9217	1043.21	104.195	-157.851	-545.114		43.9217	628.37	74.5433	-35.1859	-68.373
43.9325	103		43.9325	119		43.9325	107		43.9348	359.612			43.9348	39549		43.9348	-15509.9		43.9348	1043.21	152.195	-171.351	-491.114		43.9348	630.037	81.5433	-28.6859	-69.373
43.9456	92		43.9456	110		43.9456	97		43.948	358.712			43.948	38799		43.948	-13643.2		43.948	1058.21	138.695	-169.851	-512.114		43.948	625.037	76.0433	-23.6859	-70.0396
43.9587	113		43.9587	111		43.9587	109		43.9611	360.812			43.9611	41049		43.9611	-18043.2		43.9611	1043.21	152.195	-132.351	-525.614		43.9611	615.037	77.5433	-15.1859	-69.7063
43.9718	127		43.9718	95		43.9718	104		43.9742	353.912			43.9742	38049		43.9742	-16176.6		43.9742	1073.21	137.195	-159.351	-459.614		43.9742	613.37	85.0433	-23.1859	-65.373
43.985	118		43.985	97		43.985	110		43.9874	357.812			43.9874	42299		43.9874	-16043.2		43.9874	1055.21	131.195	-141.351	-515.114		43.9874	618.37	73.0433	-29.1859	-64.0396
43.9981	95		43.9981	118		43.9981	77		44.0005	354.812			44.0005	37299		44.0005	-15243.2		44.0005	1046.21	131.195	-174.351	-519.614		44.0005	623.37	76.5433	-17.1859	-69.373
44.0112	100		44.0112	105		44.0112	104		44.0136	355.112			44.0136	37799		44.0136	-12843.2		44.0136	1076.21	146.195	-121.851	-519.614		44.0136	625.037	81.0433	-20.1859	-63.0396
44.0244	107		44.0244	91		44.0244	103		44.0268	353.312			44.0268	36299		44.0268	-11776.6		44.0268	1037.21	132.695	-126.351	-501.614		44.0268	630.037	71.5433	-32.6859	-59.7063
44.0375	112		44.0375	105		44.0375	128		44.0399	354.512			44.0399	41049		44.0399	-13376.6		44.0399	1034.21	141.695	-165.351	-494.114		44.0399	623.37	77.0433	-20.1859	-65.7063
44.0506	91		44.0506	105		44.0506	98		44.053	356.912			44.053	40049		44.053	-12176.6		44.053	1052.21	137.195	-172.851	-494.114		44.053	628.37	70.5433	-21.6859	-61.7063
44.0638	101		44.0638	125		44.0638	122		44.0662	365.312			44.0662	37799		44.0662	-15509.9		44.0662	1058.21	152.195	-172.851	-567.614		44.0662	610.037	80.0433	-13.1859	-64.7063
44.0769	98		44.0769	107		44.0769	102		44.0793	350.612			44.0793	37049		44.0793	-14843.2		44.0793	1016.21	119.195	-210.351	-522.614		44.0793	621.703	76.0433	-20.6859	-74.373
44.09	98		44.09	89		44.09	89		44.0924	353.612			44.0924	39549		44.0924	-11643.2		44.0924	1067.21	146.195	-148.851	-516.614		44.0924	635.037	73.5433	-22.6859	-69.0396
44.1031	86		44.1031	115		44.1031	101		44.1056	351.812			44.1056	40049		44.1056	-14443.2		44.1056	1064.21	120.695	-154.851	-525.614		44.1056	601.703	76.0433	-32.6859	-68.373
44.1163	107		44.1163	119		44.1163	108		44.1187	352.412			44.1187	36799		44.1187	-16309.9		44.1187	1061.21	123.695	-195.351	-485.114		44.1187	615.037	73.5433	-16.6859	-76.0396
44.1294	107		44.1294	103		44.1294	86		44.1318	352.712			44.1318	38299		44.1318	-14176.6		44.1318	1016.21	107.195	-171.351	-486.614		44.1318	631.703	75.0433	-25.6859	-72.0396
44.1425	119		44.1425	96		44.1425	95		44.1449	354.812			44.1449	38299		44.1449	-16843.2		44.1449	1046.21	104.195	-156.351	-507.614		44.1449	613.37	78.5433	-34.6859	-64.373
44.1557	113		44.1557	98		44.1557	94		44.1581	354.212			44.1581	38799		44.1581	-15376.6		44.1581	1037.21	122.195	-198.351	-521.114		44.1581	628.37	83.5433	-18.1859	-64.0396
44.1688	96		44.1688	138		44.1688	85		44.1712	352.712			44.1712	39799		44.1712	-16576.6		44.1712	1037.21	123.695	-147.351	-519.614		44.1712	616.703	76.0433	-34.1859	-69.373
44.1819	109		44.1819	97		44.1819	101		44.1843	356.612			44.1843	39799		44.1843	-16576.6		44.1843	1046.21	143.195	-180.351	-491.114		44.1843	608.37	74.5433	-21.1859	-67.0396
44.1951	104		44.1951	115		44.1951	98		44.1975	354.812			44.1975	37299		44.1975	-14443.2		44.1975	1064.21	116.195	-186.351	-542.114		44.1975	630.037	72.0433	-13.1859	-76.0396
44.2082	124		44.2082	83		44.2082	109		44.2106	358.712			44.2106	38049		44.2106	-15243.2		44.2106	1049.21	150.695	-192.351	-462.614		44.2106	625.037	74.0433	-18.1859	-75.7063
44.2213	109		44.2213	103		44.2213	110		44.2237	359.612			44.2237	36549		44.2237	-10976.6		44.2237	1064.21	114.695	-168.351	-447.614		44.2237	623.37	69.0433	-25.1859	-65.373
44.2345	100		44.2345	111		44.2345	128		44.2368	356.312			44.2368	35549		44.2368	-15776.6		44.2368	1037.21	125.195	-160.851	-513.614		44.2368	651.703	69.5433	-24.1859	-69.0396
44.2476	107		44.2476	90		44.2476	110		44.25	354.212			44.25	38549		44.25	-12576.6		44.25	1082.21	117.695	-199.851	-494.114		44.25	608.37	75.0433	-32.6859	-72.373
44.2607	109		44.2607	103		44.2607	115		44.2631	357.812			44.2631	41049		44.2631	-15243.2		44.2631	1034.21	113.195	-124.851	-513.614		44.2631	640.037	83.5433	-16.6859	-78.373
44.2738	108		44.2738	129		44.2738	112		44.2762	355.412			44.2762	39049		44.2762	-13909.9		44.2762	1013.21	132.695	-151.851	-501.614		44.2762	631.703	75.5433	-19.1859	-66.7063
44.287	100		44.287	103		44.287	105		44.2894	351.512			44.2894	39049		44.2894	-16176.6		44.2894	1061.21	110.195	-162.351	-507.614		44.2894	610.037	77.5433	-29.1859	-71.373
44.3001	89		44.3001	102		44.3001	86		44.3025	357.512			44.3025	34299		44.3025	-14843.2		44.3025	1073.21	132.695	-220.851	-470.114		44.3025	621.703	72.0433	-29.6859	-69.373
44.3132	100		44.3132	110		44.3132	95		44.3156	354.212			44.3156	39299		44.3156	-15909.9		44.3156	1031.21	140.195	-169.851	-510.614		44.3156	620.037	80.5433	-14.6859	-79.373
44.3264	87		44.3264	108		44.3264	103		44.3288	357.512			44.3288	41799		44.3288	-15643.2		44.3288	1040.21	108.695	-120.351	-522.614		44.3288	601.703	72.0433	-30.1859	-72.373
44.3395	87		44.3395	107		44.3395	93		44.3419	356.012			44.3419	38299		44.3419	-16843.2		44.3419	1052.21	126.695	-159.351	-476.114		44.3419	598.37	69.5433	-16.1859	-69.373
44.3526	103		44.3526	91		44.3526	93		44.355	356.912			44.355	40799		44.355	-18443.2		44.355	1079.21	119.195	-142.851	-495.614		44.355	626.703	73.5433	-21.6859	-66.7063
44.3657	92		44.3657	123		44.3657	106		44.3681	351.512			44.3681	37049		44.3681	-15509.9		44.3681	1034.21	138.695	-168.351	-498.614		44.3681	635.037	74.0433	-34.1859	-80.373
44.3789	106		44.3789	141		44.3789	98		44.3813	351.812			44.3813	38049		44.3813	-14709.9		44.3813	1055.21	140.195	-178.851	-474.614		44.3813	620.037	80.5433	-28.1859	-68.0396
44.392	119		44.392	120		44.392	92		44.3944	353.312			44.3944	42799		44.3944	-16709.9		44.3944	1067.21	134.195	-190.851	-516.614		44.3944	620.037	78.0433	-28.6859	-68.7063
44.4051	103		44.4051	127		44.4051	96		44.4075	351.512			44.4075	40549		44.4075	-15243.2		44.4075	1058.21	122.195	-166.851	-521.114		44.4075	615.037	73.5433	-28.1859	-70.7063
44.4183	120		44.4183	112		44.4183	95		44.4207	349.112			44.4207	35799		44.4207	-16843.2		44.4207	1064.21	140.195	-109.851	-464.114		44.4207	613.37	76.0433	-24.6859	-72.373
44.4314	105		44.4314	105		44.4314	94		44.4338	357.512			44.4338	38049		44.4338	-16709.9		44.4338	1043.21	125.195	-106.851	-554.114		44.4338	635.037	72.5433	-26.6859	-71.0396
44.4445	125		44.4445	111		44.4445	116		44.4469	355.112			44.4469	37049		44.4469	-12043.2		44.4469	1031.21	135.695	-159.351	-489.614		44.4469	613.37	70.0433	-29.6859	-73.7063
44.4577	93		44.4577	96		44.4577	97		44.4601	352.112			44.4601	37299		44.4601	-16176.6		44.4601	1046.21	150.695	-223.851	-503.114		44.4601	633.37	73.0433	-24.6859	-69.7063
44.4708	102		44.4708	80		44.4708	98		44.4732	351.212			44.4732	39049		44.4732	-15509.9		44.4732	1040.21	131.195	-216.351	-542.114		44.4732	618.37	83.5433	-29.1859	-72.373
44.4839	120		44.4839	105		44.4839	107		44.4863	353.312			44.4863	38049		44.4863	-12976.6		44.4863	1028.21	120.695	-156.351	-539.114		44.4863	623.37	83.5433	-23.1859	-65.373
44.4971	100		44.4971	98		44.4971	102		44.4995	354.812			44.4995	36549		44.4995	-13643.2		44.4995	1040.21	128.195	-183.351	-486.614		44.4995	618.37	71.0433	-13.1859	-71.7063
44.5102	106		44.5102	92		44.5102	103		44.5126	358.412			44.5126	32299		44.5126	-16576.6		44.5126	1034.21	125.195	-165.351	-497.114		44.5126	636.703	84.5433	-21.1859	-65.7063
44.5233	99		44.5233	117		44.5233	94		44.5257	352.712			44.5257	39799		44.5257	-15243.2		44.5257	1052.21	132.695	-174.351	-486.614		44.5257	628.37	76.0433	-34.1859	-67.373
44.5365	119		44.5365	111		44.5365	88		44.5388	350.012			44.5388	37799		44.5388	-17243.2		44.5388	1022.21	110.195	-145.851	-528.614		44.5388	608.37	75.0433	-22.6859	-70.373
44.5496	113		44.5496	104		44.5496	96		44.552	358.112			44.552	38549		44.552	-14309.9		44.552	1052.21	125.195	-159.351	-512.114		44.552	605.037	68.5433	-20.1859	-72.0396
44.5627	109		44.5627	111		44.5627	84		44.5651	356.012			44.5651	39799		44.5651	-13243.2		44.5651	1052.21	132.695	-201.351	-512.114		44.5651	620.037	87.5433	-24.6859	-74.7063
44.5758	137		44.5758	103		44.5758	93		44.5782	353.912			44.5782	43049		44.5782	-13776.6		44.5782	1037.21	117.695	-144.351	-491.114		44.5782	620.037	80.5433	-27.6859	-72.373
44.589	118		44.589	93		44.589	117		44.5914	353.312			44.5914	36799		44.5914	-15376.6		44.5914	1037.21	116.195	-186.351	-519.614		44.5914	625.037	66.5433	-27.6859	-71.373
44.6021	106		44.6021	98		44.6021	101		44.6045	354.212			44.6045	40549		44.6045	-16043.2		44.6045	1043.21	138.695	-181.851	-525.614		44.6045	628.37	74.0433	-25.1859	-73.0396
44.6152	96		44.6152	112		44.6152	96		44.6176	353.612			44.6176	36549		44.6176	-15776.6		44.6176	1055.21	126.695	-177.351	-486.614		44.6176	615.037	86.0433	-13.1859	-75.373
44.6284	105		44.6284	116		44.6284	91		44.6308	354.212			44.6308	41049		44.6308	-12576.6		44.6308	1052.21	132.695	-165.351	-576.614		44.6308	603.37	78.5433	-26.1859	-61.7063
44.6415	117		44.6415	110		44.6415	84		44.6439	353.912			44.6439	40549		44.6439	-16976.6		44.6439	1061.21	152.195	-166.851	-477.614		44.6439	618.37	79.5433	-30.1859	-69.7063
44.6546	118		44.6546	97		44.6546	100		44.657	350.912			44.657	40049		44.657	-12976.6		44.657	1025.21	117.695	-166.851	-486.614		44.657	615.037	82.5433	-23.6859	-63.7063
44.6677	106		44.6677	82		44.6677	124		44.6701	354.212			44.6701	36549		44.6701	-15509.9		44.6701	1043.21	122.195	-160.851	-506.114		44.6701	640.037	77.5433	-23.6859	-68.0396
44.6809	114		44.6809	117		44.6809	90		44.6833	354.212			44.6833	39799		44.6833	-14709.9		44.6833	1040.21	126.695	-144.351	-528.614		44.6833	621.703	80.5433	-20.1859	-65.7063
44.694	114		44.694	109		44.694	108		44.6964	352.412			44.6964	37799		44.6964	-13509.9		44.6964	1049.21	143.195	-151.851	-512.114		44.6964	618.37	70.0433	-26.1859	-69.373
44.7071	101		44.7071	98		44.7071	114		44.7095	356.612			44.7095	44049		44.7095	-16043.2		44.7095	1037.21	138.695	-180.351	-492.614		44.7095	628.37	69.0433	-25.1859	-80.373
44.7203	103		44.7203	95		44.7203	99		44.7227	353.912			44.7227	39049		44.7227	-18843.2		44.7227	1067.21	105.695	-150.351	-519.614		44.7227	623.37	73.5433	-21.6859	-70.373
44.7334	130		44.7334	102		44.7334	110		44.7358	353.612			44.7358	38799		44.7358	-12309.9		44.7358	1046.21	92.1953	-199.851	-482.114		44.7358	635.037	80.5433	-19.6859	-73.7063
44.7465	126		44.7465	104		44.7465	99		44.7489	355.712			44.7489	42049		44.7489	-14576.6		44.7489	1055.21	125.195	-210.351	-494.114		44.7489	635.037	69.5433	-26.1859	-68.0396
44.7597	102		44.7597	104		44.7597	87		44.7621	356.612			44.7621	41299		44.7621	-13776.6		44.7621	1046.21	138.695	-189.351	-506.114		44.7621	610.037	54.5433	-26.6859	-73.7063
44.7728	109		44.7728	114		44.7728	101		44.7752	356.912			44.7752	39549		44.7752	-17243.2		44.7752	1028.21	126.695	-177.351	-513.614		44.7752	620.037	80.0433	-26.1859	-72.373
44.7859	116		44.7859	108		44.7859	76		44.7883	353.912			44.7883	37299		44.7883	-13909.9		44.7883	1052.21	128.195	-153.351	-518.114		44.7883	623.37	78.0433	-39.1859	-68.7063
44.7991	112		44.7991	103		44.7991	118		44.8015	352.412			44.8015	39299		44.8015	-14043.2		44.8015	1070.21	114.695	-165.351	-500.114		44.8015	618.37	75.0433	-37.1859	-75.7063
44.8122	83		44.8122	107		44.8122	100		44.8146	355.412			44.8146	38299		44.8146	-14176.6		44.8146	1064.21	137.195	-204.351	-503.114		44.8146	615.037	69.0433	-27.6859	-64.7063
44.8253	95		44.8253	102		44.8253	108		44.8277	356.012			44.8277	39299		44.8277	-12709.9		44.8277	1085.21	123.695	-180.351	-533.114		44.8277	625.037	57.5433	-32.6859	-70.7063
44.8384	110		44.8384	109		44.8384	118		44.8408	353.612			44.8408	38299		44.8408	-14043.2		44.8408	1001.21	137.195	-180.351	-512.114		44.8408	615.037	71.0433	-29.6859	-71.7063
44.8516	105		44.8516	104		44.8516	87		44.854	352.712			44.854	39799		44.854	-16043.2		44.854	1061.21	126.695	-162.351	-491.114		44.854	610.037	75.5433	-30.6859	-70.373
44.8647	117		44.8647	97		44.8647	96		44.8671	356.312			44.8671	35799		44.8671	-19243.2		44.8671	1076.21	141.695	-172.851	-489.614		44.8671	635.037	85.5433	-16.6859	-73.0396
44.8778	116		44.8778	126		44.8778	85		44.8802	356.012			44.8802	38049		44.8802	-12176.6		44.8802	1052.21	117.695	-186.351	-539.114		44.8802	628.37	83.5433	-27.1859	-65.373
44.891	129		44.891	105		44.891	102		44.8934	359.312			44.8934	37549		44.8934	-16309.9		44.8934	1043.21	117.695	-213.351	-495.614		44.8934	608.37	78.0433	-22.6859	-68.0396
44.9041	107		44.9041	116		44.9041	100		44.9065	359.312			44.9065	36049		44.9065	-14709.9		44.9065	1067.21	125.195	-175.851	-524.114		44.9065	618.37	67.0433	-24.1859	-67.0396
44.9172	87		44.9172	109		44.9172	97		44.9196	359.612			44.9196	35549		44.9196	-16043.2		44.9196	1028.21	122.195	-204.351	-495.614		44.9196	633.37	71.0433	-30.1859	-76.0396
44.9303	106		44.9303	109		44.9303	116		44.9327	354.512			44.9327	39799		44.9327	-11776.6		44.9327	1046.21	114.695	-235.851	-486.614		44.9327	638.37	67.0433	-33.1859	-73.0396
44.9435	102		44.9435	107		44.9435	102		44.9459	355.712			44.9459	37799		44.9459	-15509.9		44.9459	1055.21	123.695	-208.851	-497.114		44.9459	638.37	80.5433	-24.1859	-72.0396
44.9566	96		44.9566	108		44.9566	90		44.959	359.912			44.959	37049		44.959	-15109.9		44.959	1046.21	120.695	-201.351	-483.614		44.959	631.703	78.0433	-20.6859	-71.7063
44.9697	101		44.9697	115		44.9697	102		44.9721	356.612			44.9721	37799		44.9721	-14976.6		44.9721	1079.21	122.195	-165.351	-498.614		44.9721	618.37	66.5433	-24.6859	-67.0396
44.9829	116		44.9829	121		44.9829	108		44.9853	357.512			44.9853	36799		44.9853	-16043.2		44.9853	1061.21	140.195	-165.351	-524.114		44.9853	608.37	79.5433	-22.6859	-71.373
44.996	134		44.996	121		44.996	93		44.9984	353.612			44.9984	37049		44.9984	-19643.2		44.9984	1058.21	126.695	-216.351	-504.614		44.9984	633.37	83.5433	-37.1859	-67.7063
45.0091	104		45.0091	123		45.0091	83		45.0115	355.112			45.0115	39049		45.0115	-12443.2		45.0115	1049.21	129.695	-166.851	-507.614		45.0115	633.37	77.5433	-28.1859	-69.373
45.0223	117		45.0223	98		45.0223	111		45.0247	360.812			45.0247	40299		45.0247	-17509.9		45.0247	1022.21	117.695	-174.351	-524.114		45.0247	655.037	73.5433	-24.1859	-71.373
45.0354	100		45.0354	135		45.0354	99		45.0378	354.812			45.0378	37799		45.0378	-12043.2		45.0378	1070.21	131.195	-144.351	-504.614		45.0378	618.37	77.0433	-20.1859	-78.373
45.0485	119		45.0485	119		45.0485	105		45.0509	354.212			45.0509	38549		45.0509	-16576.6		45.0509	1031.21	120.695	-166.851	-513.614		45.0509	623.37	70.5433	-35.1859	-75.0396
45.0617	112		45.0617	102		45.0617	105		45.0641	356.312			45.0641	37799		45.0641	-14709.9		45.0641	1061.21	129.695	-228.351	-479.114		45.0641	618.37	73.0433	-23.6859	-73.0396
45.0748	93		45.0748	97		45.0748	112		45.0772	354.812			45.0772	40299		45.0772	-13376.6		45.0772	1049.21	123.695	-172.851	-530.114		45.0772	630.037	76.0433	-35.1859	-70.7063
45.0879	117		45.0879	124		45.0879	82		45.0903	354.512			45.0903	39549		45.0903	-16043.2		45.0903	1058.21	120.695	-228.351	-504.614		45.0903	625.037	67.5433	-16.6859	-66.7063
45.1011	107		45.1011	111		45.1011	119		45.1035	359.612			45.1035	39299		45.1035	-13376.6		45.1035	1046.21	126.695	-163.851	-510.614		45.1035	625.037	86.5433	-18.6859	-69.373
45.1142	95		45.1142	99		45.1142	106		45.1166	355.112			45.1166	40049		45.1166	-18043.2		45.1166	1049.21	143.195	-199.851	-525.614		45.1166	623.37	79.5433	-22.1859	-71.0396
45.1273	124		45.1273	103		45.1273	96		45.1297	363.512			45.1297	38549		45.1297	-14309.9		45.1297	1031.21	135.695	-183.351	-501.614		45.1297	625.037	72.0433	-26.6859	-70.7063
45.1404	110		45.1404	108		45.1404	86		45.1428	352.412			45.1428	34549		45.1428	-13109.9		45.1428	1043.21	119.195	-208.851	-465.614		45.1428	621.703	70.5433	-29.1859	-72.373
45.1536	79		45.1536	117		45.1536	111		45.156	359.912			45.156	38049		45.156	-18576.6		45.156	1052.21	135.695	-216.351	-512.114		45.156	601.703	73.5433	-31.1859	-72.0396
45.1667	103		45.1667	116		45.1667	88		45.1691	362.612			45.1691	39799		45.1691	-17109.9		45.1691	1052.21	128.195	-180.351	-521.114		45.1691	611.703	73.5433	-28.6859	-67.7063
45.1798	110		45.1798	120		45.1798	92		45.1822	359.612			45.1822	37299		45.1822	-17376.6		45.1822	1040.21	120.695	-213.351	-536.114		45.1822	625.037	76.5433	-20.1859	-76.0396
45.193	114		45.193	85		45.193	108		45.1954	359.312			45.1954	41799		45.1954	-16443.2		45.1954	1058.21	128.195	-187.851	-519.614		45.1954	646.703	73.5433	-31.1859	-66.0396
45.2061	116		45.2061	92		45.2061	101		45.2085	365.912			45.2085	36049		45.2085	-16176.6		45.2085	1037.21	119.195	-219.351	-513.614		45.2085	625.037	77.5433	-22.1859	-60.0396
45.2192	129		45.2192	90		45.2192	92		45.2216	361.412			45.2216	37799		45.2216	-15643.2		45.2216	1031.21	102.695	-204.351	-527.114		45.2216	603.37	81.5433	-28.1859	-71.7063
45.2323	113		45.2323	91		45.2323	98		45.2347	353.012			45.2347	42549		45.2347	-16443.2		45.2347	1073.21	147.695	-183.351	-537.614		45.2347	625.037	73.5433	-18.1859	-72.0396
45.2455	100		45.2455	100		45.2455	96		45.2479	358.112			45.2479	37299		45.2479	-18576.6		45.2479	1052.21	111.695	-217.851	-561.614		45.2479	628.37	65.0433	-32.6859	-62.373
45.2586	102		45.2586	108		45.2586	106		45.261	360.512			45.261	36549		45.261	-12843.2		45.261	1049.21	119.195	-195.351	-501.614		45.261	620.037	65.5433	-25.6859	-74.7063
45.2717	105		45.2717	97		45.2717	122		45.2741	353.912			45.2741	39299		45.2741	-15376.6		45.2741	1034.21	110.195	-174.351	-498.614		45.2741	620.037	71.5433	-23.6859	-73.373
45.2849	109		45.2849	132		45.2849	110		45.2873	356.612			45.2873	35799		45.2873	-12976.6		45.2873	1037.21	134.195	-132.351	-506.114		45.2873	621.703	78.0433	-19.1859	-78.7063
45.298	120		45.298	122		45.298	103		45.3004	358.112			45.3004	40049		45.3004	-15776.6		45.3004	1049.21	132.695	-199.851	-495.614		45.3004	615.037	57.5433	-36.6859	-68.0396
45.3111	114		45.3111	106		45.3111	92		45.3135	365.312			45.3135	42549		45.3135	-11776.6		45.3135	1046.21	92.1953	-145.851	-498.614		45.3135	611.703	73.5433	-27.1859	-77.373
45.3243	114		45.3243	101		45.3243	94		45.3267	359.912			45.3267	38299		45.3267	-17109.9		45.3267	1064.21	107.195	-216.351	-516.614		45.3267	630.037	77.5433	-29.6859	-74.7063
45.3374	98		45.3374	120		45.3374	111		45.3398	356.612			45.3398	35799		45.3398	-18843.2		45.3398	1043.21	120.695	-208.851	-545.114		45.3398	618.37	67.5433	-25.6859	-72.0396
45.3505	123		45.3505	84		45.3505	116		45.3529	354.812			45.3529	35799		45.3529	-18576.6		45.3529	1046.21	129.695	-205.851	-525.614		45.3529	615.037	68.0433	-36.1859	-70.7063
45.3636	117		45.3636	105		45.3636	81		45.3661	361.112			45.3661	35799		45.3661	-14576.6		45.3661	1055.21	140.195	-183.351	-524.114		45.3661	626.703	71.5433	-29.6859	-70.373
45.3768	109		45.3768	107		45.3768	96		45.3792	357.812			45.3792	39299		45.3792	-17776.6		45.3792	1043.21	132.695	-177.351	-482.114		45.3792	635.037	66.5433	-37.6859	-66.373
45.3899	98		45.3899	117		45.3899	107		45.3923	357.812			45.3923	40049		45.3923	-14843.2		45.3923	1019.21	116.195	-196.851	-518.114		45.3923	620.037	72.0433	-27.6859	-70.0396
45.403	107		45.403	117		45.403	114		45.4054	356.612			45.4054	38799		45.4054	-15909.9		45.4054	1052.21	129.695	-225.351	-525.614		45.4054	620.037	79.5433	-28.6859	-67.0396
45.4162	110		45.4162	101		45.4162	82		45.4186	359.612			45.4186	41049		45.4186	-17909.9		45.4186	1058.21	111.695	-171.351	-521.114		45.4186	635.037	70.5433	-28.6859	-73.0396
45.4293	120		45.4293	85		45.4293	103		45.4317	360.512			45.4317	38299		45.4317	-15376.6		45.4317	1028.21	117.695	-204.351	-504.614		45.4317	638.37	75.0433	-31.6859	-69.7063
45.4424	100		45.4424	111		45.4424	98		45.4448	356.912			45.4448	35549		45.4448	-19509.9		45.4448	1010.21	128.195	-166.851	-515.114		45.4448	630.037	72.0433	-31.1859	-68.373
45.4556	118		45.4556	102		45.4556	107		45.458	358.112			45.458	36049		45.458	-16443.2		45.458	1043.21	126.695	-169.851	-524.114		45.458	613.37	73.5433	-28.6859	-70.7063
45.4687	108		45.4687	97		45.4687	84		45.4711	361.712			45.4711	40799		45.4711	-15243.2		45.4711	1064.21	128.195	-190.851	-506.114		45.4711	608.37	74.5433	-31.1859	-74.0396
45.4818	122		45.4818	110		45.4818	114		45.4842	359.612			45.4842	38549		45.4842	-15376.6		45.4842	1025.21	128.195	-195.351	-518.114		45.4842	615.037	76.0433	-23.6859	-72.7063
45.495	111		45.495	106		45.495	94		45.4974	356.912			45.4974	36799		45.4974	-17909.9		45.4974	1040.21	161.195	-229.851	-525.614		45.4974	600.037	73.0433	-38.6859	-60.373
45.5081	83		45.5081	101		45.5081	99		45.5105	361.112			45.5105	38049		45.5105	-17376.6		45.5105	1037.21	113.195	-162.351	-522.614		45.5105	613.37	73.5433	-33.1859	-71.0396
45.5212	104		45.5212	118		45.5212	94		45.5236	355.712			45.5236	41049		45.5236	-17109.9		45.5236	1034.21	129.695	-187.851	-516.614		45.5236	625.037	70.0433	-20.6859	-75.373
45.5344	121		45.5344	110		45.5344	104		45.5367	360.512			45.5367	38299		45.5367	-16443.2		45.5367	1040.21	128.195	-169.851	-480.614		45.5367	631.703	69.0433	-20.6859	-59.7063
45.5475	107		45.5475	107		45.5475	112		45.5499	362.612			45.5499	37299		45.5499	-15776.6		45.5499	1049.21	140.195	-180.351	-518.114		45.5499	630.037	76.5433	-35.1859	-68.7063
45.5606	98		45.5606	97		45.5606	104		45.563	358.712			45.563	34299		45.563	-16176.6		45.563	1049.21	122.195	-177.351	-479.114		45.563	628.37	68.0433	-29.1859	-68.7063
45.5737	129		45.5737	111		45.5737	84		45.5761	359.312			45.5761	38049		45.5761	-15109.9		45.5761	1034.21	92.1953	-157.851	-467.114		45.5761	623.37	75.5433	-25.1859	-76.0396
45.5869	115		45.5869	103		45.5869	78		45.5893	360.812			45.5893	36799		45.5893	-15109.9		45.5893	1061.21	117.695	-166.851	-495.614		45.5893	625.037	79.0433	-23.1859	-62.373
45.6	123		45.6	96		45.6	86		45.6024	360.212			45.6024	38299		45.6024	-15509.9		45.6024	1043.21	128.195	-187.851	-536.114		45.6024	630.037	76.5433	-17.1859	-72.373
45.6131	111		45.6131	95		45.6131	116		45.6155	359.312			45.6155	36049		45.6155	-17776.6		45.6155	1013.21	132.695	-220.851	-516.614		45.6155	613.37	66.0433	-29.1859	-75.7063
45.6263	106		45.6263	86		45.6263	88		45.6287	352.712			45.6287	41799		45.6287	-14576.6		45.6287	1049.21	147.695	-201.351	-512.114		45.6287	616.703	85.0433	-27.6859	-68.7063
45.6394	110		45.6394	128		45.6394	105		45.6418	359.612			45.6418	37549		45.6418	-18043.2		45.6418	1055.21	104.195	-151.851	-524.114		45.6418	616.703	71.5433	-29.6859	-69.0396
45.6525	105		45.6525	109		45.6525	90		45.6549	356.012			45.6549	41799		45.6549	-18443.2		45.6549	1046.21	122.195	-204.351	-479.114		45.6549	638.37	70.0433	-33.6859	-77.373
45.6656	107		45.6656	107		45.6656	92		45.6681	356.612			45.6681	38799		45.6681	-17376.6		45.6681	1043.21	132.695	-205.851	-504.614		45.6681	616.703	67.0433	-22.1859	-77.0396
45.6788	100		45.6788	95		45.6788	97		45.6812	359.012			45.6812	40049		45.6812	-14976.6		45.6812	1064.21	134.195	-189.351	-507.614		45.6812	611.703	78.0433	-27.6859	-66.7063
45.6919	109		45.6919	100		45.6919	88		45.6943	358.412			45.6943	38549		45.6943	-12843.2		45.6943	1040.21	105.695	-187.851	-512.114		45.6943	618.37	76.5433	-38.1859	-67.0396
45.705	112		45.705	106		45.705	84		45.7074	362.912			45.7074	39799		45.7074	-19243.2		45.7074	1046.21	114.695	-190.851	-506.114		45.7074	618.37	77.0433	-34.6859	-77.373
45.7182	105		45.7182	124		45.7182	76		45.7206	357.212			45.7206	41799		45.7206	-19109.9		45.7206	1049.21	123.695	-177.351	-513.614		45.7206	616.703	76.0433	-27.1859	-67.7063
45.7313	112		45.7313	117		45.7313	101		45.7337	358.412			45.7337	40549		45.7337	-15109.9		45.7337	1049.21	134.195	-210.351	-498.614		45.7337	630.037	79.5433	-27.1859	-66.0396
45.7444	117		45.7444	120		45.7444	92		45.7468	359.012			45.7468	38799		45.7468	-19776.6		45.7468	1067.21	102.695	-205.851	-504.614		45.7468	611.703	63.5433	-38.6859	-70.373
45.7576	114		45.7576	118		45.7576	110		45.76	357.212			45.76	37549		45.76	-12043.2		45.76	1025.21	120.695	-189.351	-503.114		45.76	616.703	80.0433	-20.6859	-70.7063
45.7707	100		45.7707	116		45.7707	95		45.7731	357.812			45.7731	37799		45.7731	-15509.9		45.7731	1025.21	146.195	-205.851	-519.614		45.7731	620.037	82.5433	-25.1859	-77.0396
45.7838	102		45.7838	113		45.7838	86		45.7862	362.312			45.7862	37799		45.7862	-16443.2		45.7862	1019.21	125.195	-223.851	-506.114		45.7862	606.703	75.5433	-26.1859	-73.0396
45.797	98		45.797	121		45.797	89		45.7993	362.312			45.7993	37799		45.7993	-18043.2		45.7993	1043.21	128.195	-199.851	-495.614		45.7993	616.703	68.0433	-17.6859	-70.0396
45.8101	97		45.8101	104		45.8101	91		45.8125	362.912			45.8125	37549		45.8125	-18443.2		45.8125	1055.21	107.195	-169.851	-521.114		45.8125	628.37	77.0433	-28.1859	-71.373
45.8232	109		45.8232	94		45.8232	105		45.8256	361.712			45.8256	37799		45.8256	-16309.9		45.8256	1019.21	125.195	-193.851	-501.614		45.8256	643.37	71.5433	-37.6859	-75.7063
45.8363	105		45.8363	127		45.8363	105		45.8387	363.812			45.8387	39799		45.8387	-19776.6		45.8387	1055.21	111.695	-184.851	-506.114		45.8387	628.37	71.5433	-38.1859	-75.373
45.8495	125		45.8495	98		45.8495	86		45.8519	365.912			45.8519	37549		45.8519	-12709.9		45.8519	1019.21	108.695	-141.351	-530.114		45.8519	636.703	70.0433	-29.6859	-69.0396
45.8626	107		45.8626	113		45.8626	111		45.865	358.712			45.865	37799		45.865	-19909.9		45.865	1055.21	122.195	-198.351	-531.614		45.865	620.037	78.5433	-36.1859	-65.7063
45.8757	108		45.8757	111		45.8757	104		45.8781	360.812			45.8781	36549		45.8781	-16576.6		45.8781	1031.21	123.695	-240.351	-500.114		45.8781	648.37	77.0433	-25.6859	-71.0396
45.8889	119		45.8889	103		45.8889	114		45.8913	362.912			45.8913	38049		45.8913	-17776.6		45.8913	1061.21	120.695	-211.851	-515.114		45.8913	625.037	65.5433	-26.1859	-75.373
45.902	105		45.902	114		45.902	77		45.9044	366.512			45.9044	34799		45.9044	-18709.9		45.9044	1052.21	104.195	-181.851	-500.114		45.9044	623.37	68.5433	-21.1859	-77.0396
45.9151	127		45.9151	110		45.9151	112		45.9175	365.312			45.9175	36299		45.9175	-16843.2		45.9175	1034.21	92.1953	-157.851	-516.614		45.9175	621.703	69.0433	-29.1859	-72.373
45.9283	107		45.9283	130		45.9283	98		45.9307	364.412			45.9307	35799		45.9307	-17643.2		45.9307	1037.21	119.195	-228.351	-525.614		45.9307	621.703	74.5433	-27.6859	-66.373
45.9414	119		45.9414	125		45.9414	93		45.9438	359.312			45.9438	37049		45.9438	-17243.2		45.9438	1070.21	105.695	-222.351	-531.614		45.9438	608.37	86.0433	-31.1859	-72.7063
45.9545	114		45.9545	123		45.9545	112		45.9569	363.212			45.9569	41049		45.9569	-17376.6		45.9569	1037.21	126.695	-198.351	-513.614		45.9569	613.37	74.0433	-32.6859	-64.0396
45.9676	131		45.9676	88		45.9676	84		45.9701	363.512			45.9701	37049		45.9701	-14176.6		45.9701	1040.21	113.195	-210.351	-506.114		45.9701	630.037	69.0433	-23.1859	-70.0396
45.9808	116		45.9808	113		45.9808	96		45.9832	364.712			45.9832	36549		45.9832	-16976.6		45.9832	1046.21	111.695	-187.851	-494.114		45.9832	620.037	67.0433	-33.1859	-77.7063
45.9939	95		45.9939	113		45.9939	109		45.9963	369.212			45.9963	40049		45.9963	-17109.9		45.9963	1058.21	117.695	-219.351	-509.114		45.9963	623.37	70.0433	-27.1859	-70.0396
46.007	129		46.007	129		46.007	92		46.0094	359.912			46.0094	36299		46.0094	-12976.6		46.0094	1070.21	125.195	-229.851	-506.114		46.0094	631.703	71.0433	-39.1859	-64.373
46.0202	109		46.0202	104		46.0202	102		46.0226	368.312			46.0226	35299		46.0226	-16443.2		46.0226	1040.21	107.195	-195.351	-549.614		46.0226	623.37	75.5433	-33.6859	-73.0396
46.0333	125		46.0333	92		46.0333	110		46.0357	368.012			46.0357	36549		46.0357	-15776.6		46.0357	1079.21	101.195	-201.351	-522.614		46.0357	615.037	76.0433	-34.1859	-73.373
46.0464	126		46.0464	127		46.0464	128		46.0488	363.512			46.0488	37299		46.0488	-18976.6		46.0488	1055.21	101.195	-202.851	-536.114		46.0488	630.037	89.5433	-43.1859	-76.373
46.0596	115		46.0596	104		46.0596	112		46.062	360.812			46.062	36049		46.062	-16443.2		46.062	1052.21	140.195	-166.851	-530.114		46.062	621.703	79.0433	-21.1859	-65.7063
46.0727	98		46.0727	134		46.0727	90		46.0751	359.012			46.0751	36049		46.0751	-17643.2		46.0751	1055.21	134.195	-172.851	-552.614		46.0751	625.037	83.5433	-27.6859	-76.373
46.0858	101		46.0858	123		46.0858	98		46.0882	367.112			46.0882	37049		46.0882	-17376.6		46.0882	1046.21	104.195	-207.351	-536.114		46.0882	618.37	77.0433	-37.1859	-71.0396
46.099	115		46.099	134		46.099	98		46.1013	363.212			46.1013	39549		46.1013	-16976.6		46.1013	1052.21	132.695	-165.351	-500.114		46.1013	613.37	75.5433	-27.1859	-67.0396
46.1121	107		46.1121	136		46.1121	93		46.1145	369.512			46.1145	33549		46.1145	-16576.6		46.1145	1049.21	114.695	-132.351	-524.114		46.1145	618.37	82.0433	-37.1859	-77.373
46.1252	117		46.1252	108		46.1252	108		46.1276	360.812			46.1276	36549		46.1276	-16843.2		46.1276	1025.21	117.695	-178.851	-542.114		46.1276	626.703	76.0433	-39.6859	-72.0396
46.1383	109		46.1383	110		46.1383	98		46.1407	362.612			46.1407	37549		46.1407	-19243.2		46.1407	1025.21	132.695	-196.851	-510.614		46.1407	620.037	74.0433	-41.6859	-79.0396
46.1515	133		46.1515	98		46.1515	97		46.1539	362.312			46.1539	36299		46.1539	-16443.2		46.1539	1031.21	114.695	-208.851	-534.614		46.1539	608.37	76.0433	-42.1859	-76.373
46.1646	124		46.1646	121		46.1646	107		46.167	367.712			46.167	36049		46.167	-18176.6		46.167	1055.21	143.195	-225.351	-560.114		46.167	630.037	77.0433	-21.1859	-75.7063
46.1777	121		46.1777	107		46.1777	115		46.1801	371.912			46.1801	38049		46.1801	-16976.6		46.1801	1028.21	102.695	-193.851	-497.114		46.1801	621.703	76.0433	-25.6859	-74.373
46.1909	125		46.1909	96		46.1909	101		46.1933	367.712			46.1933	38799		46.1933	-19776.6		46.1933	1055.21	96.6953	-199.851	-554.114		46.1933	610.037	69.0433	-42.1859	-74.373
46.204	112		46.204	125		46.204	107		46.2064	365.612			46.2064	38049		46.2064	-16176.6		46.2064	1052.21	122.195	-190.851	-521.114		46.2064	606.703	83.0433	-32.1859	-65.7063
46.2171	138		46.2171	117		46.2171	108		46.2195	370.412			46.2195	42299		46.2195	-19109.9		46.2195	1043.21	101.195	-205.851	-533.114		46.2195	613.37	70.0433	-35.6859	-72.373
46.2302	123		46.2302	114		46.2302	106		46.2326	370.112			46.2326	32549		46.2326	-17643.2		46.2326	1037.21	158.195	-169.851	-525.614		46.2326	620.037	74.5433	-34.1859	-74.7063
46.2434	108		46.2434	135		46.2434	106		46.2458	369.512			46.2458	35549		46.2458	-17376.6		46.2458	1055.21	108.695	-229.851	-519.614		46.2458	616.703	72.0433	-33.1859	-67.373
[truncated: 3,332 more rows]
