# Supplementary material for: Effect of peptide secondary structure on calcium phosphate mineralization for bone regeneration
Source: Royal Society of Chemistry journal article supplement (doi:10.1039/d4nj04145c), 2025-01-01
Supplement: d4nj04145c2.pdf [file d4nj04145c2.pdf]

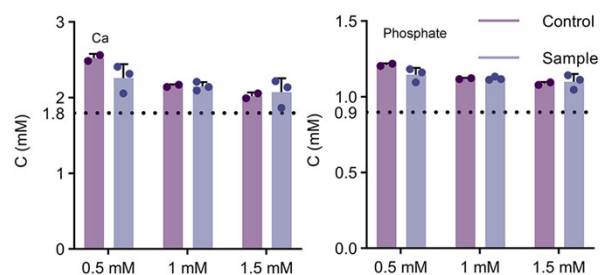

Fig. S1. Ion concentration in the extract. The blank group had 1.8 mM Ca and 0.9 mM phosphate.

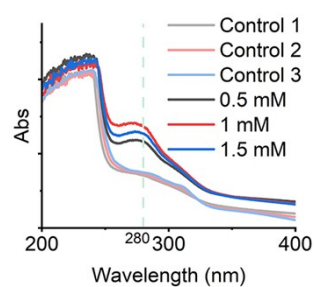

Fig. S2. UV-vis spectrum of the extract. The peaks at 280 nm indicate the presence of P<sub>11</sub>-4 in the extract, with the extract from the 1 mM group showing the highest P<sub>11</sub>-4 concentration.
